# Supplementary material
Source: PubMed Central journal article supplement (PMC4063998)

Patient Name: **Protocol ID: , Patient ID:**

Date / Time: Mon Oct 7 13:47:43 2013

Revision:

MRN:

Comment:

Planner:

Plan Name:

Physician / Physicist:

Institution:

Trial Name:

Pinnacle ID:

Links: [planDB](#)

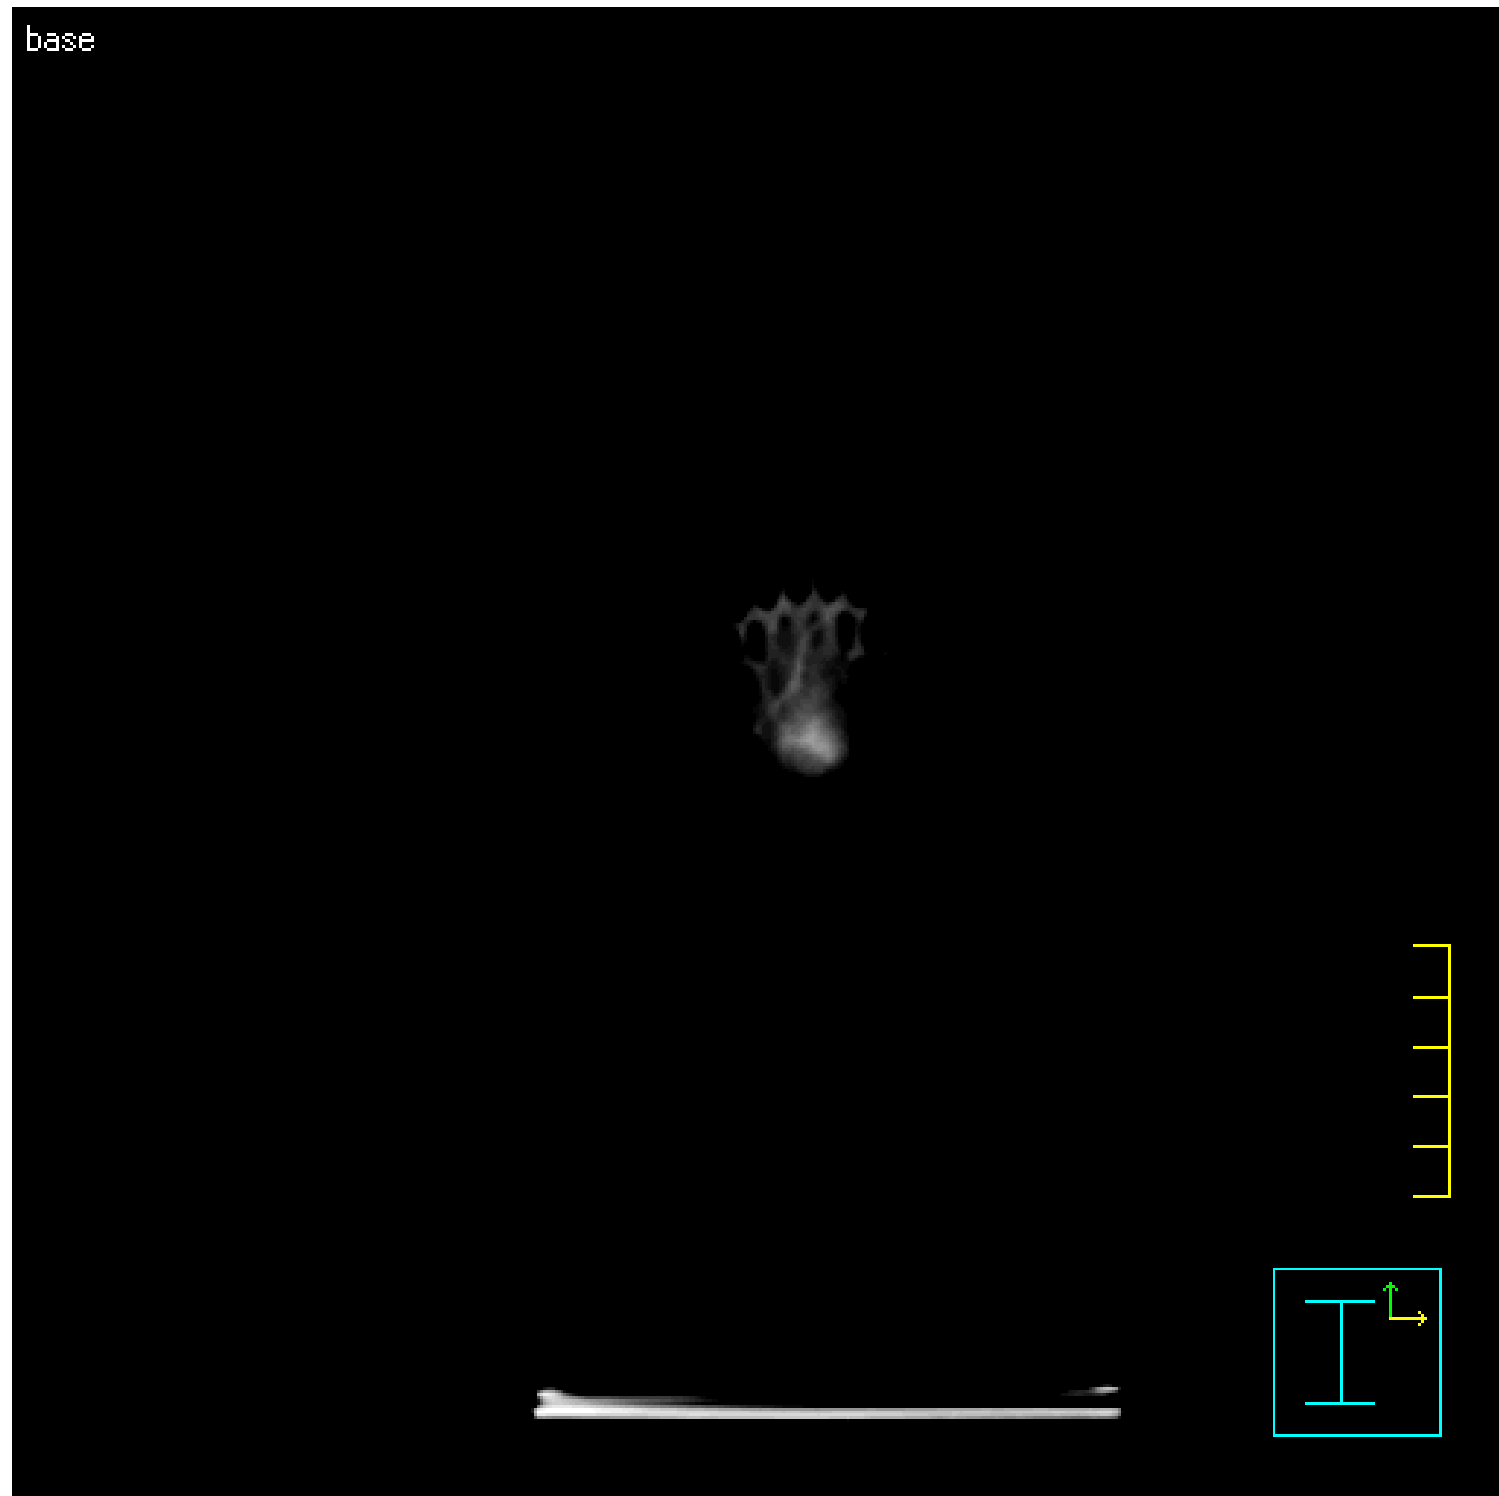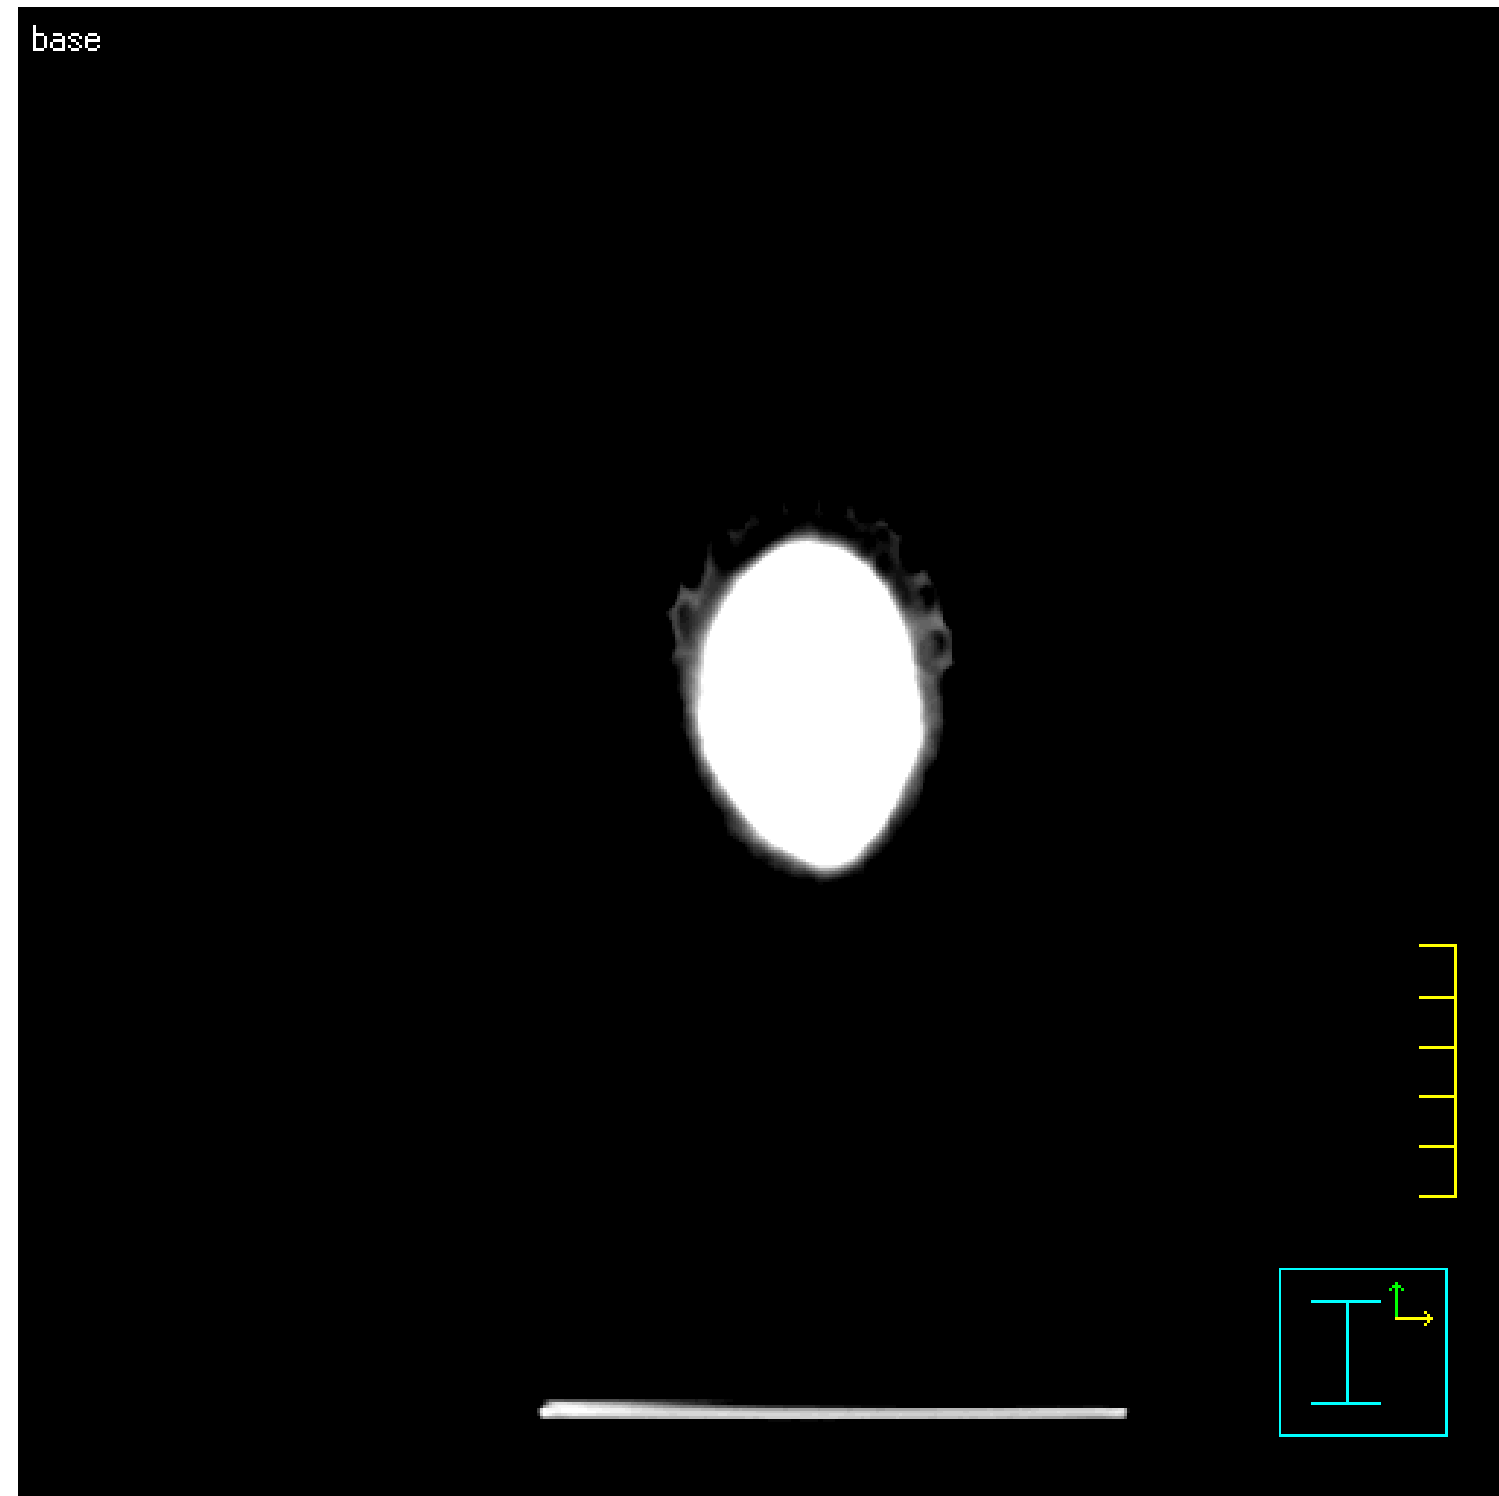

Patient Name: **Protocol ID: , Patient ID:**

Date / Time: Mon Oct 7 13:47:43 2013

Revision:

MRN:

Comment:

Planner:

Plan Name:

Physician / Physicist:

Institution:

Trial Name:

Pinnacle ID:

Links: [planDB](#)

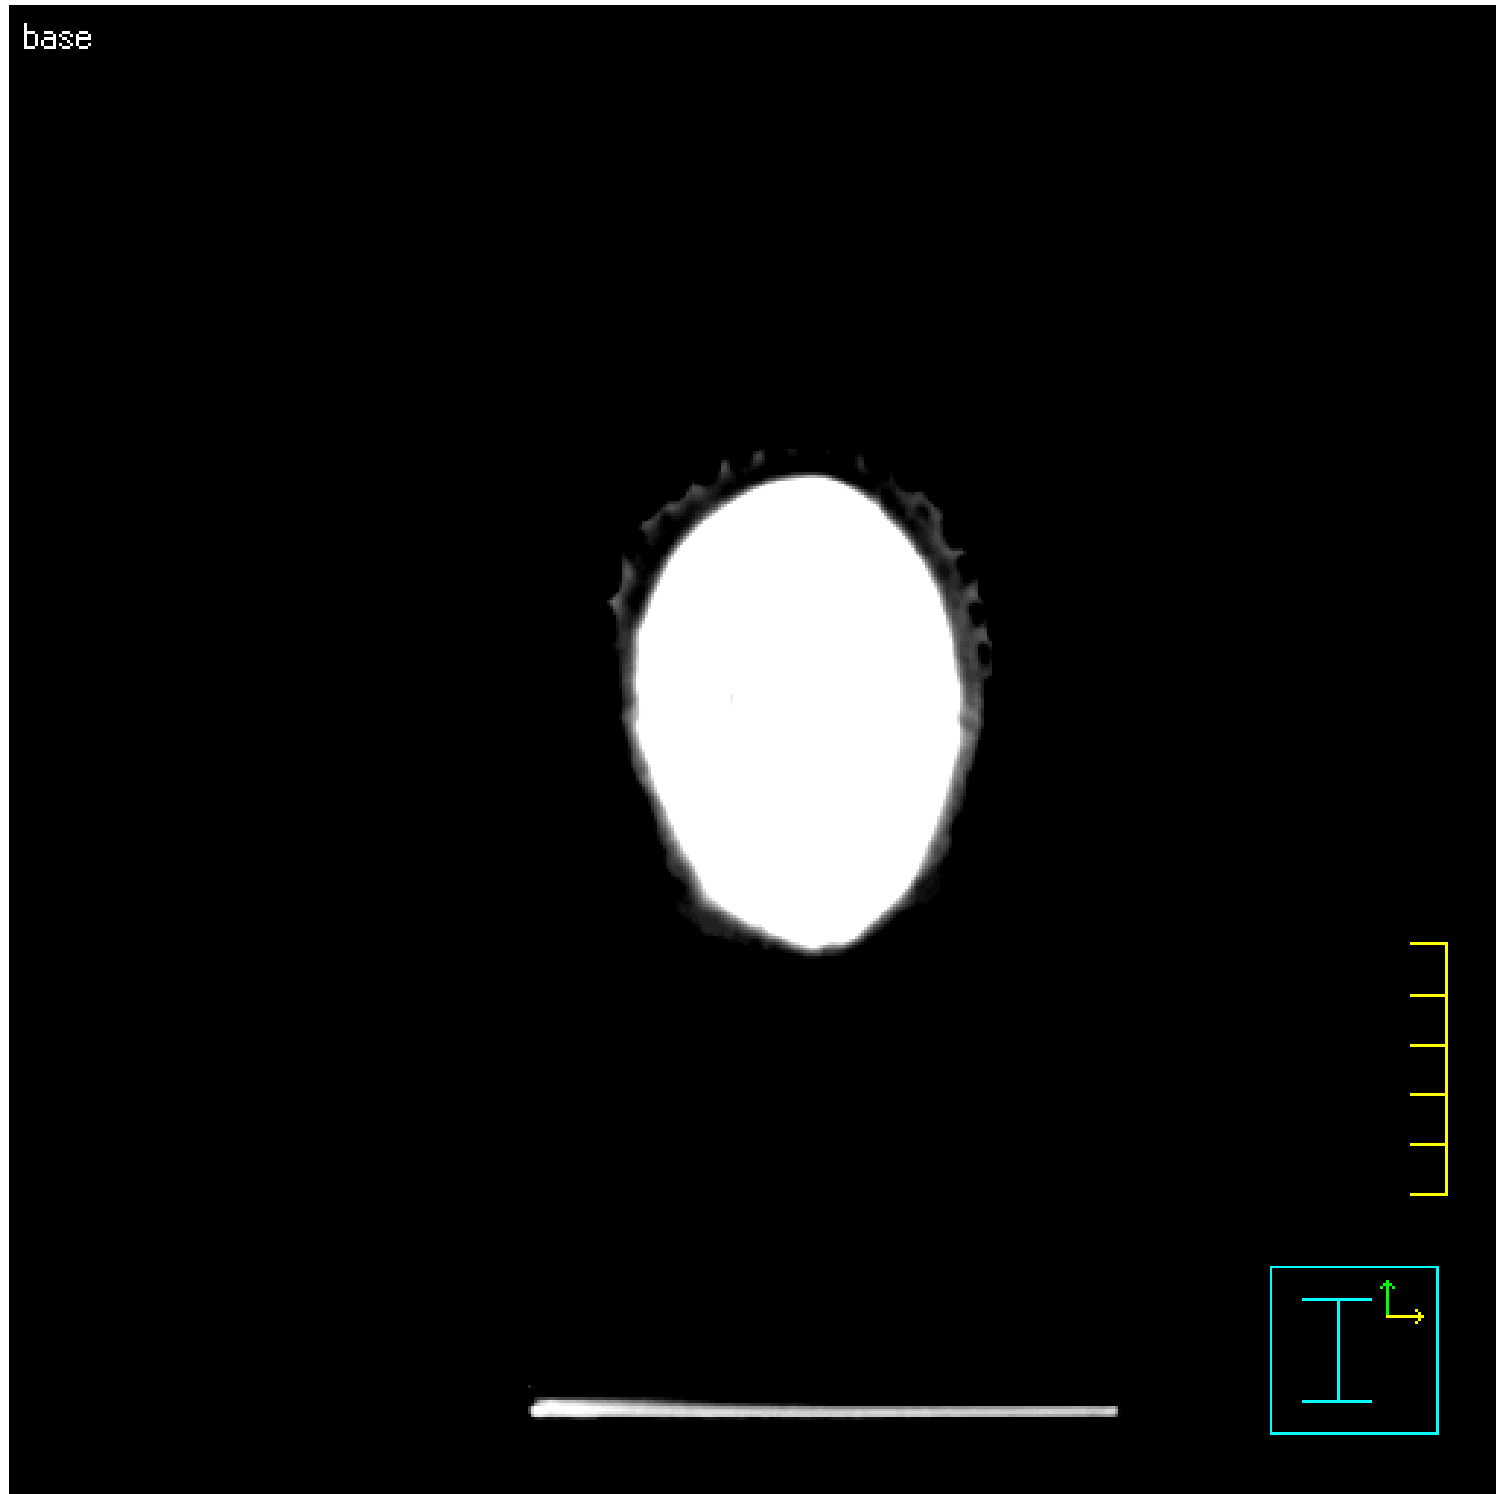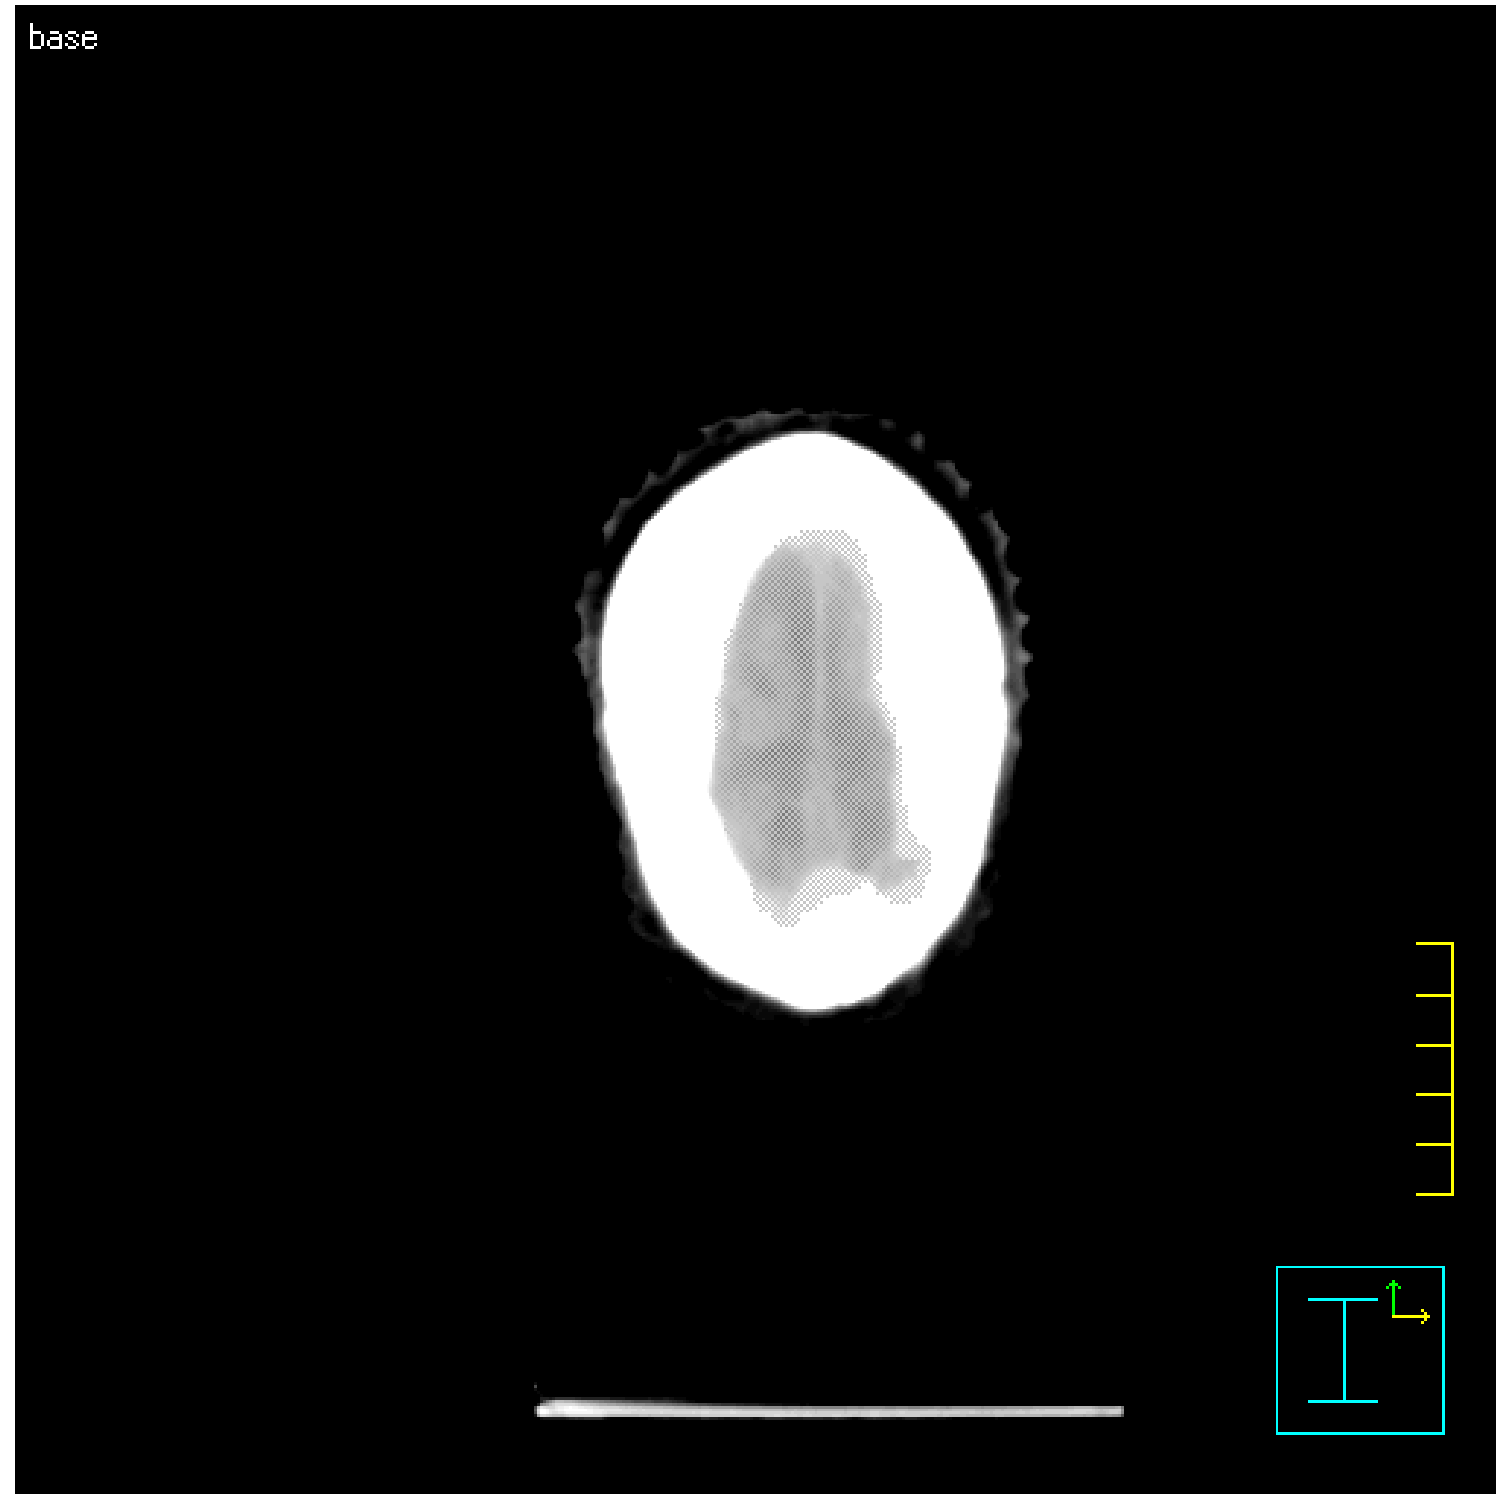

Patient Name: **Protocol ID: , Patient ID:**

Date / Time: Mon Oct 7 13:47:43 2013

Revision:

MRN:

Comment:

Planner:

Plan Name:

Physician / Physicist:

Institution:

Trial Name:

Pinnacle ID:

Links: [planDB](#)

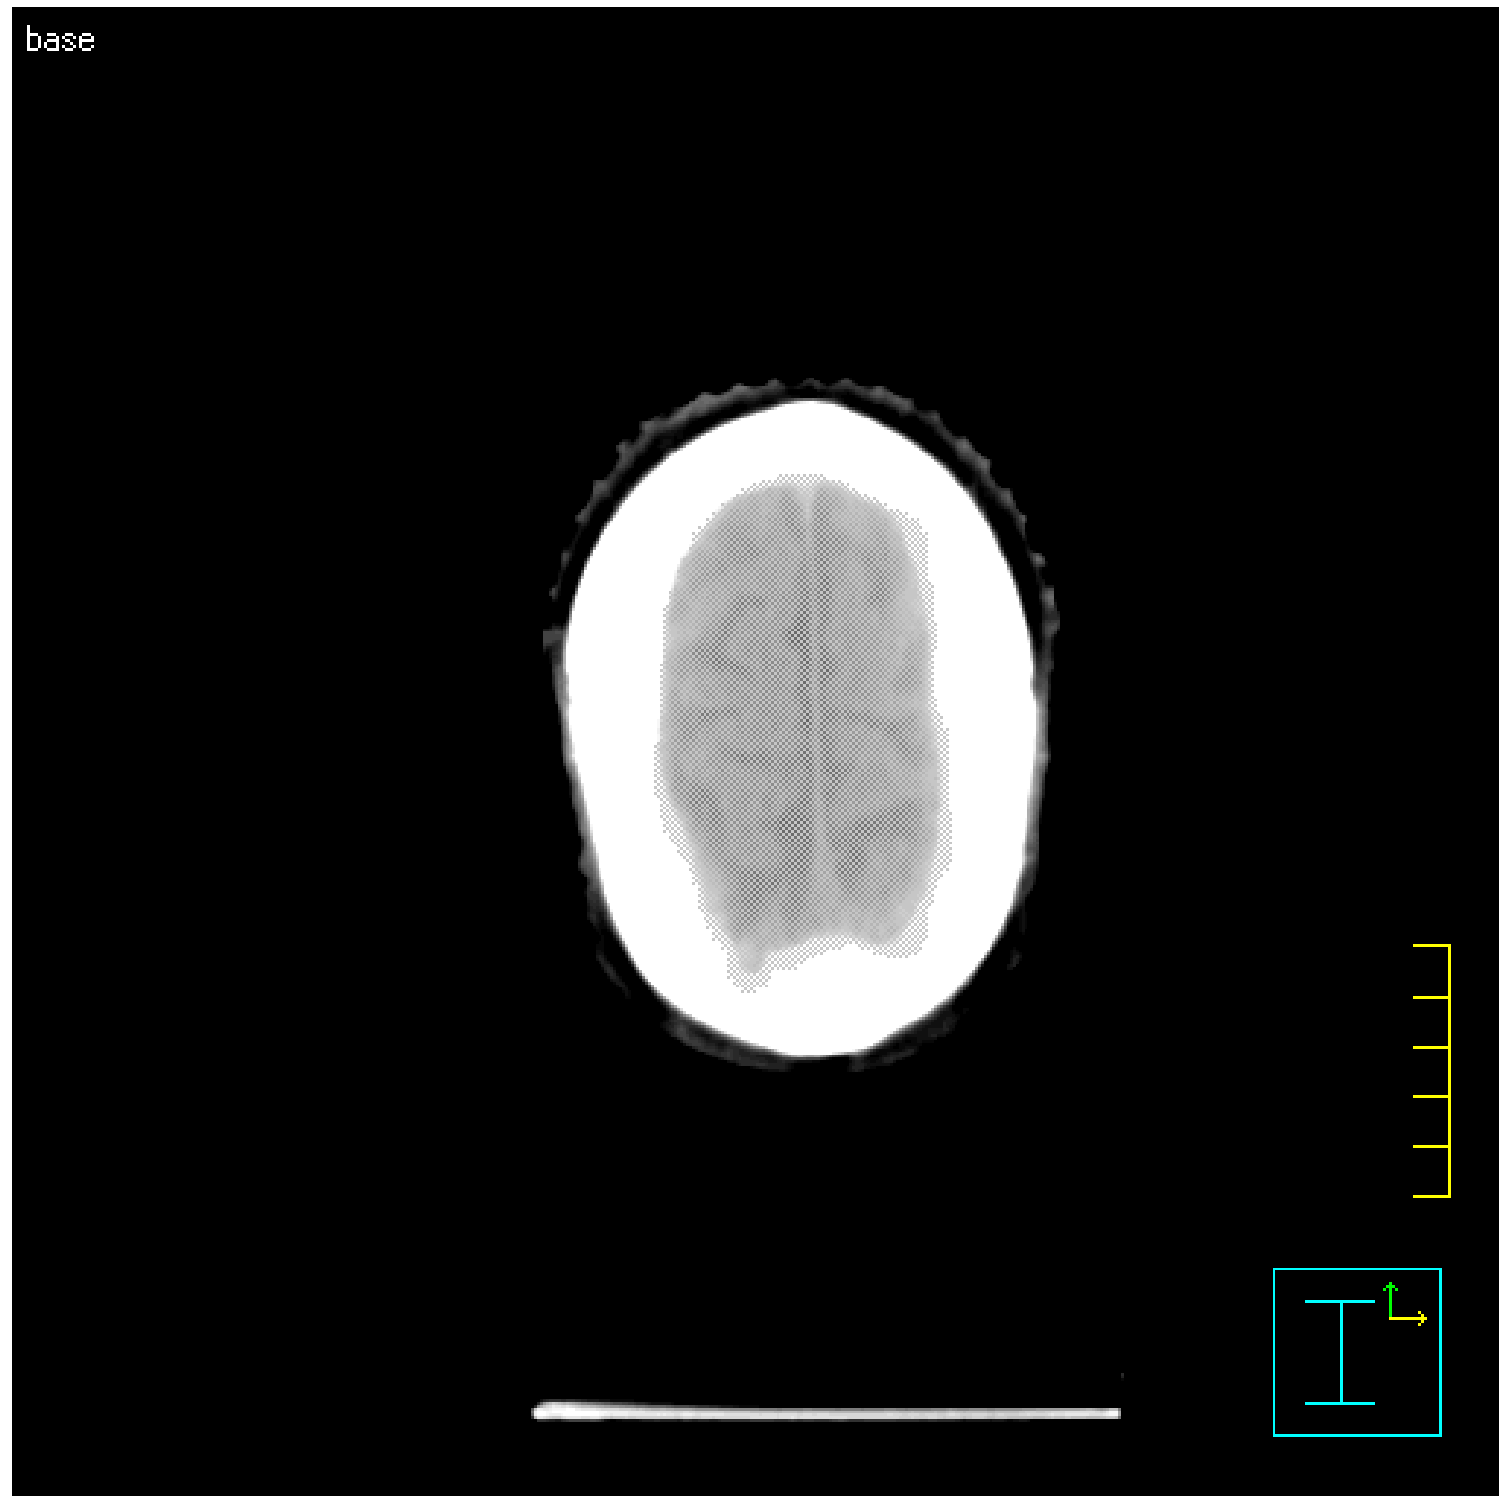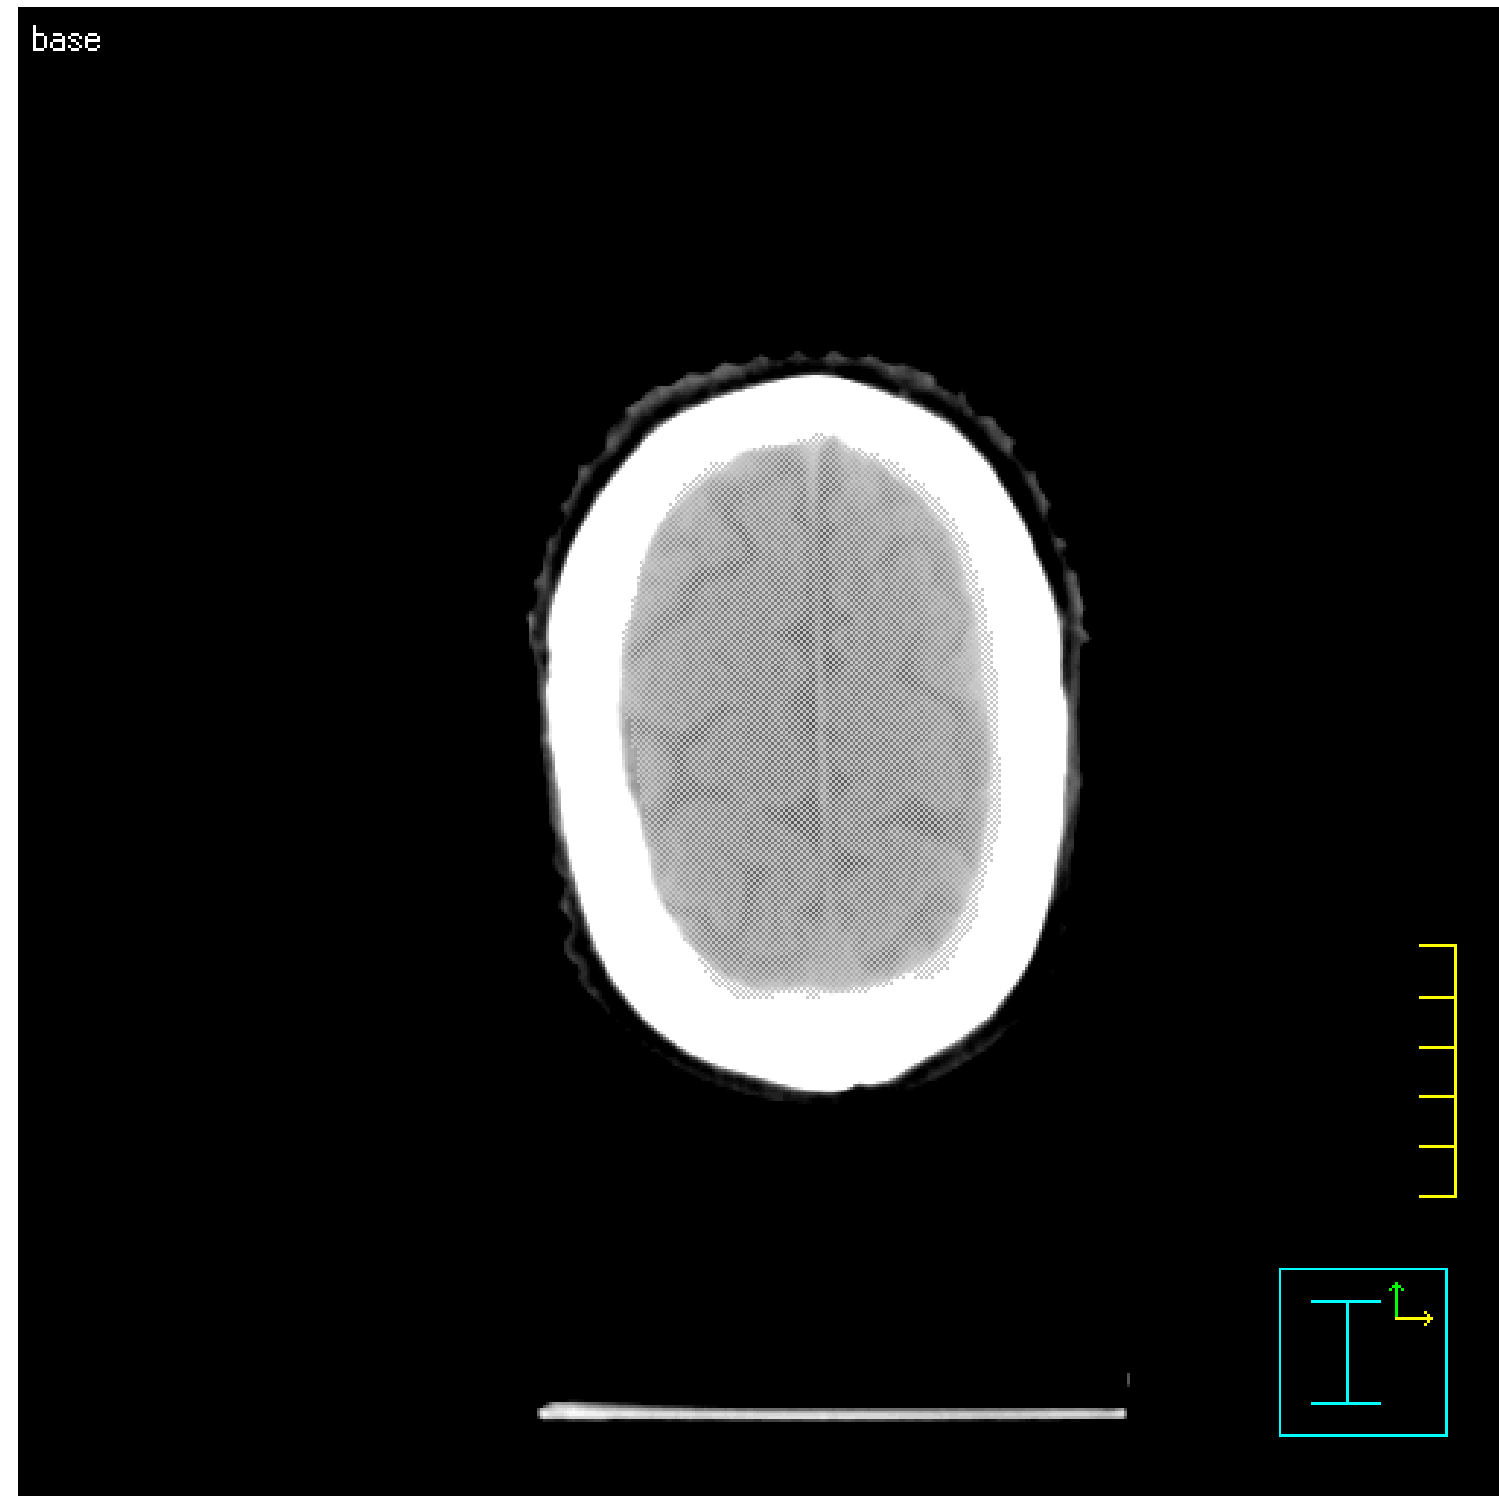

Patient Name: **Protocol ID: , Patient ID:**

Date / Time: Mon Oct 7 13:47:43 2013

Revision:

MRN:

Comment:

Planner:

Plan Name:

Physician / Physicist:

Institution:

Trial Name:

Pinnacle ID:

Links: [planDB](#)

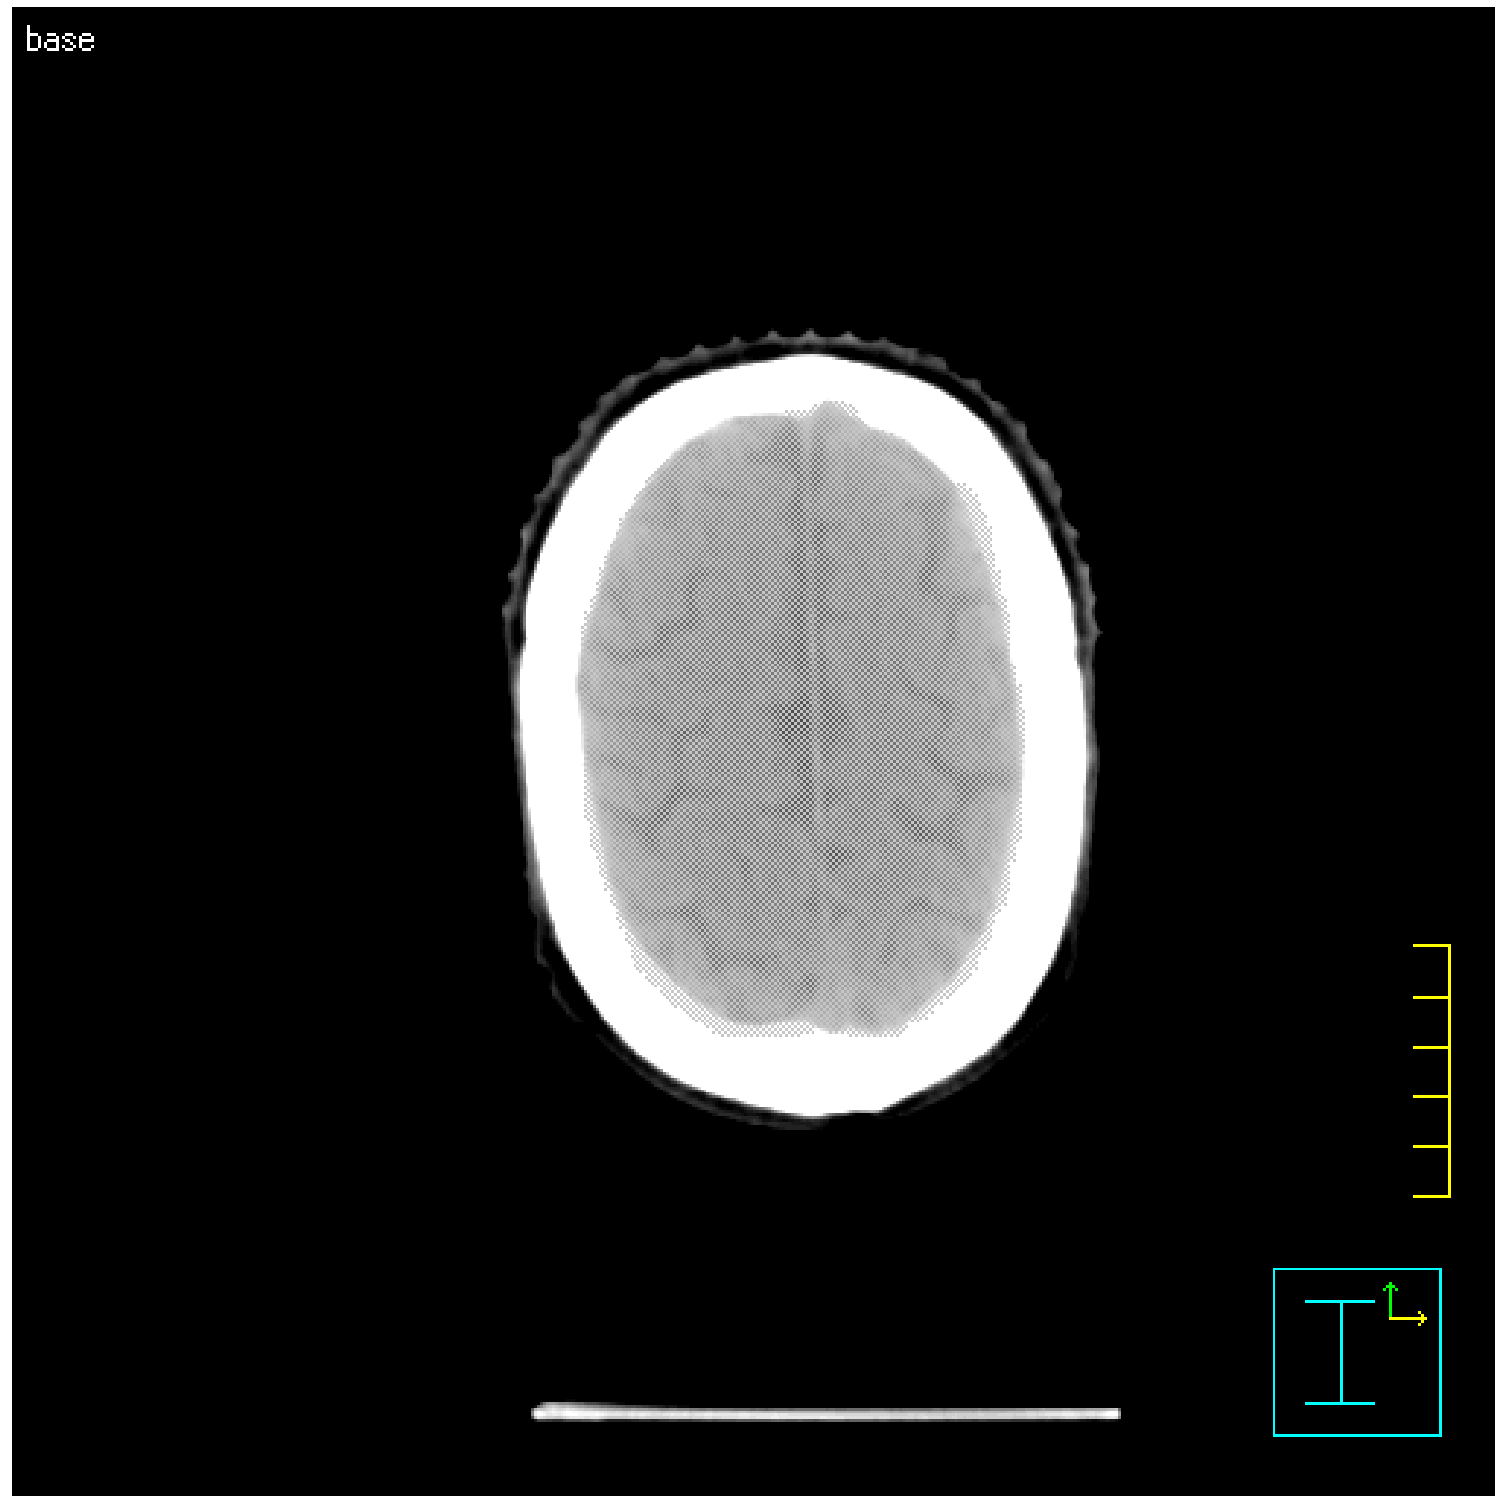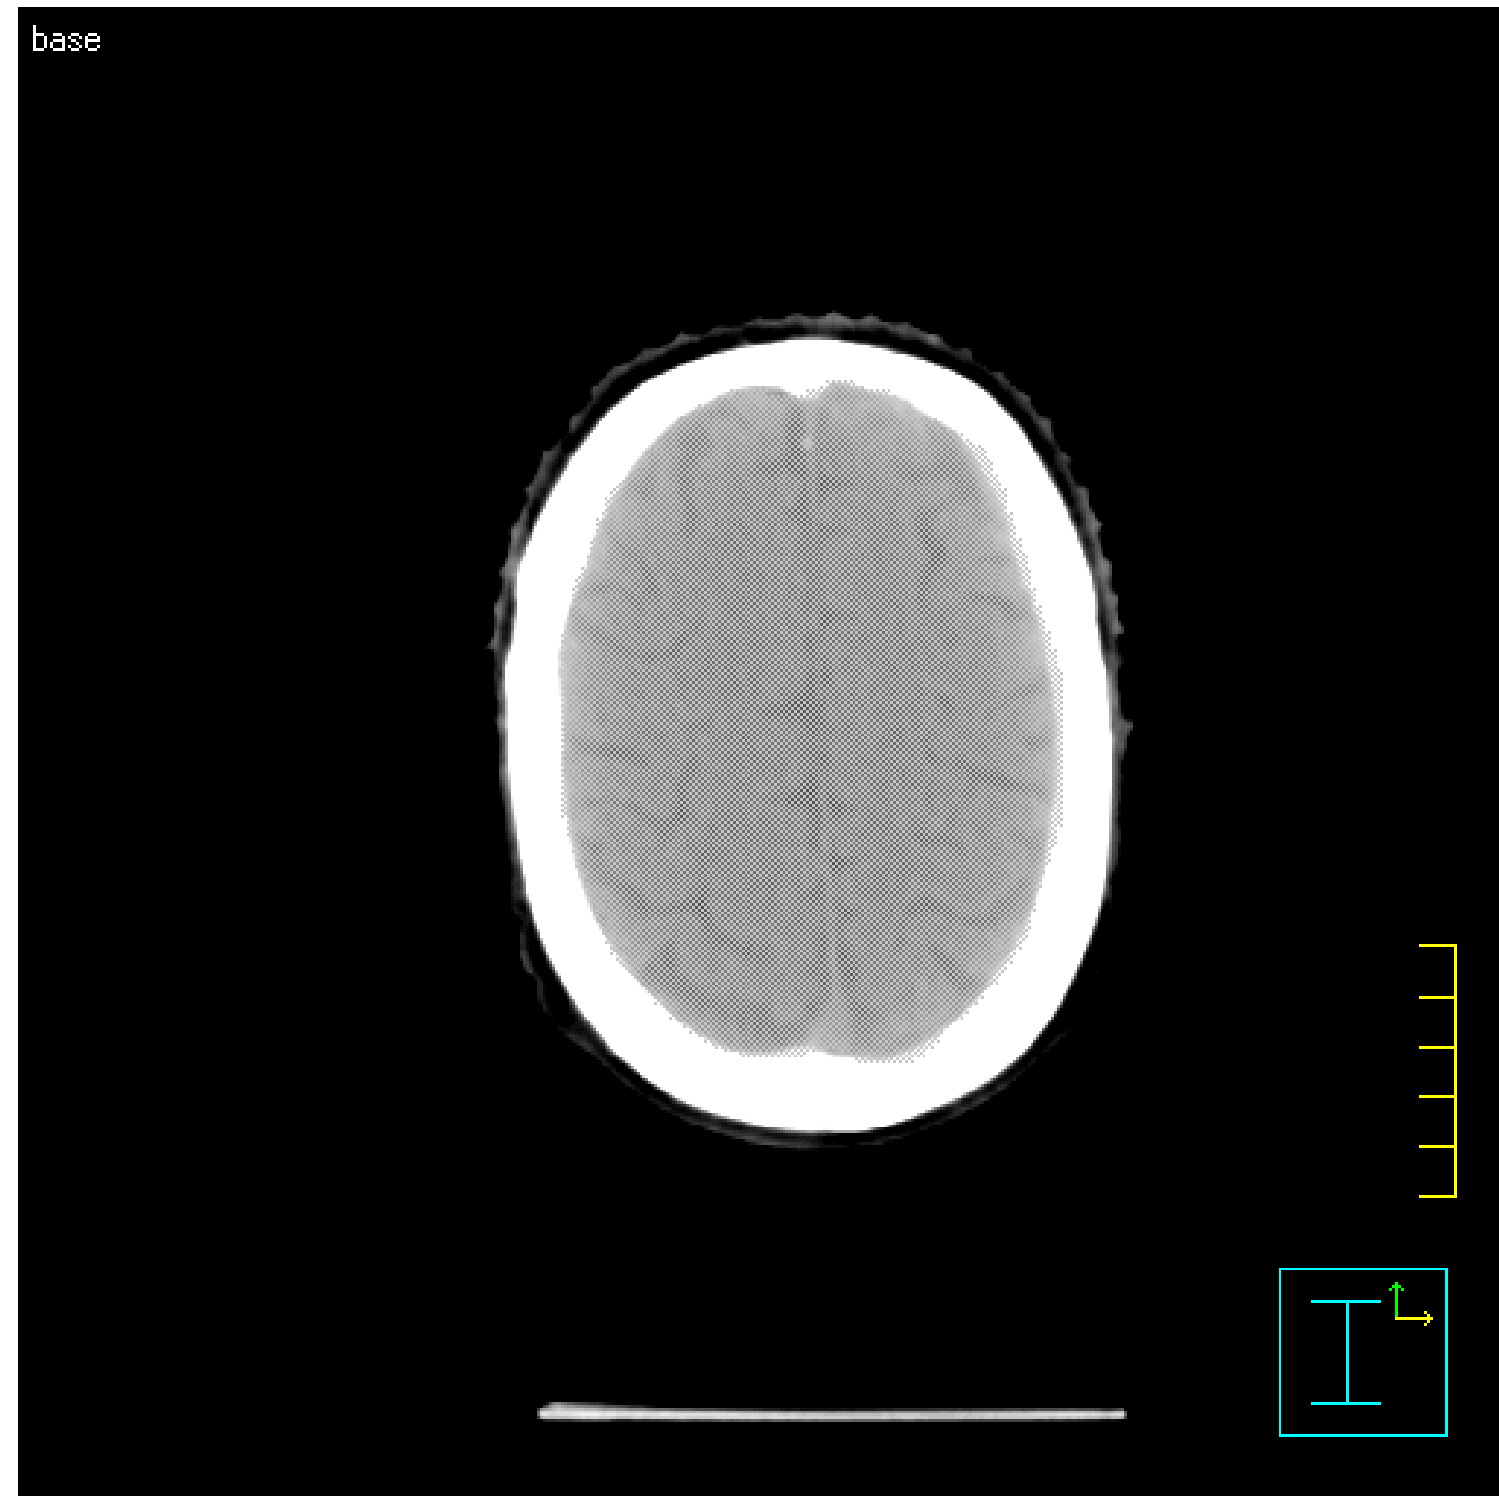

Patient Name: **Protocol ID: , Patient ID:**

Date / Time: Mon Oct 7 13:47:43 2013

Revision:

MRN:

Comment:

Planner:

Plan Name:

Physician / Physicist:

Institution:

Trial Name:

Pinnacle ID:

Links: [planDB](#)

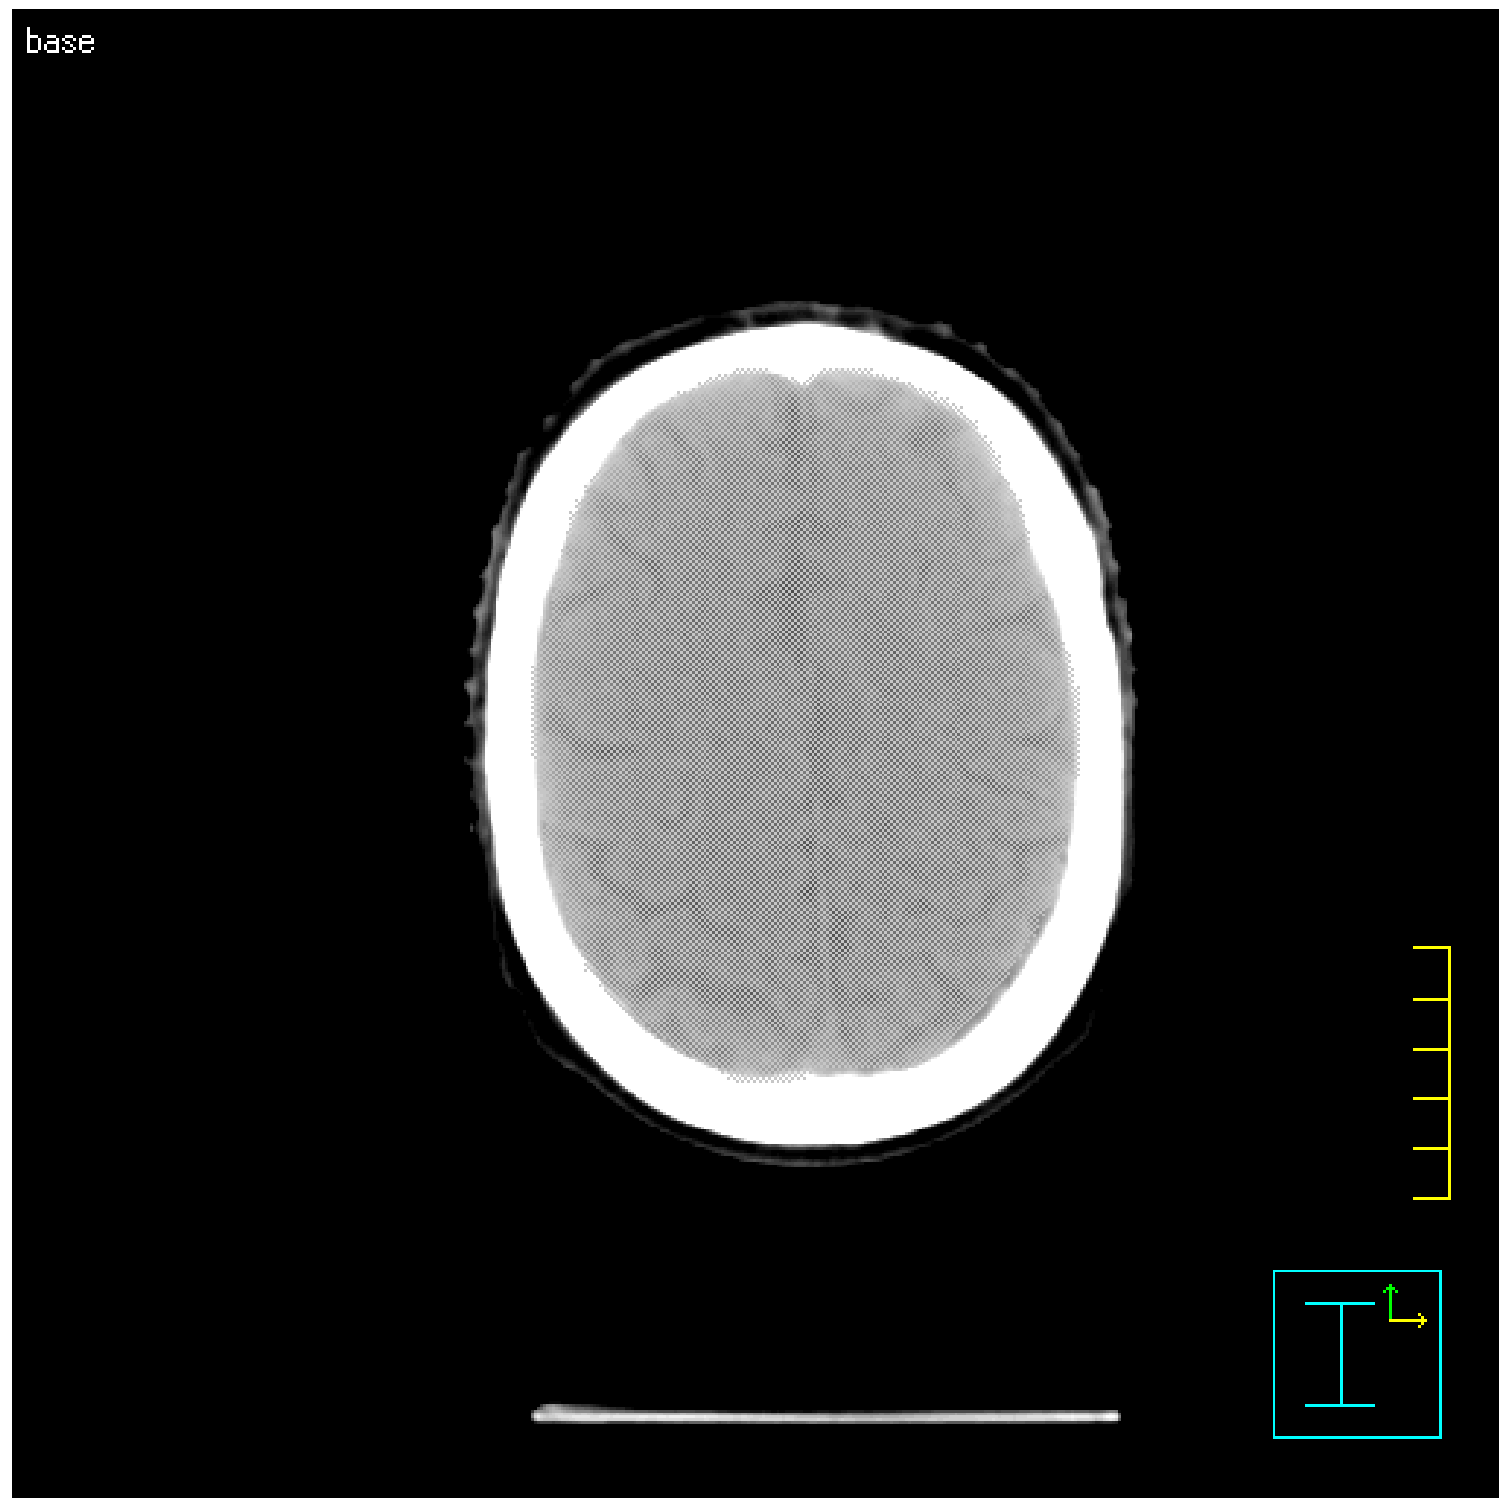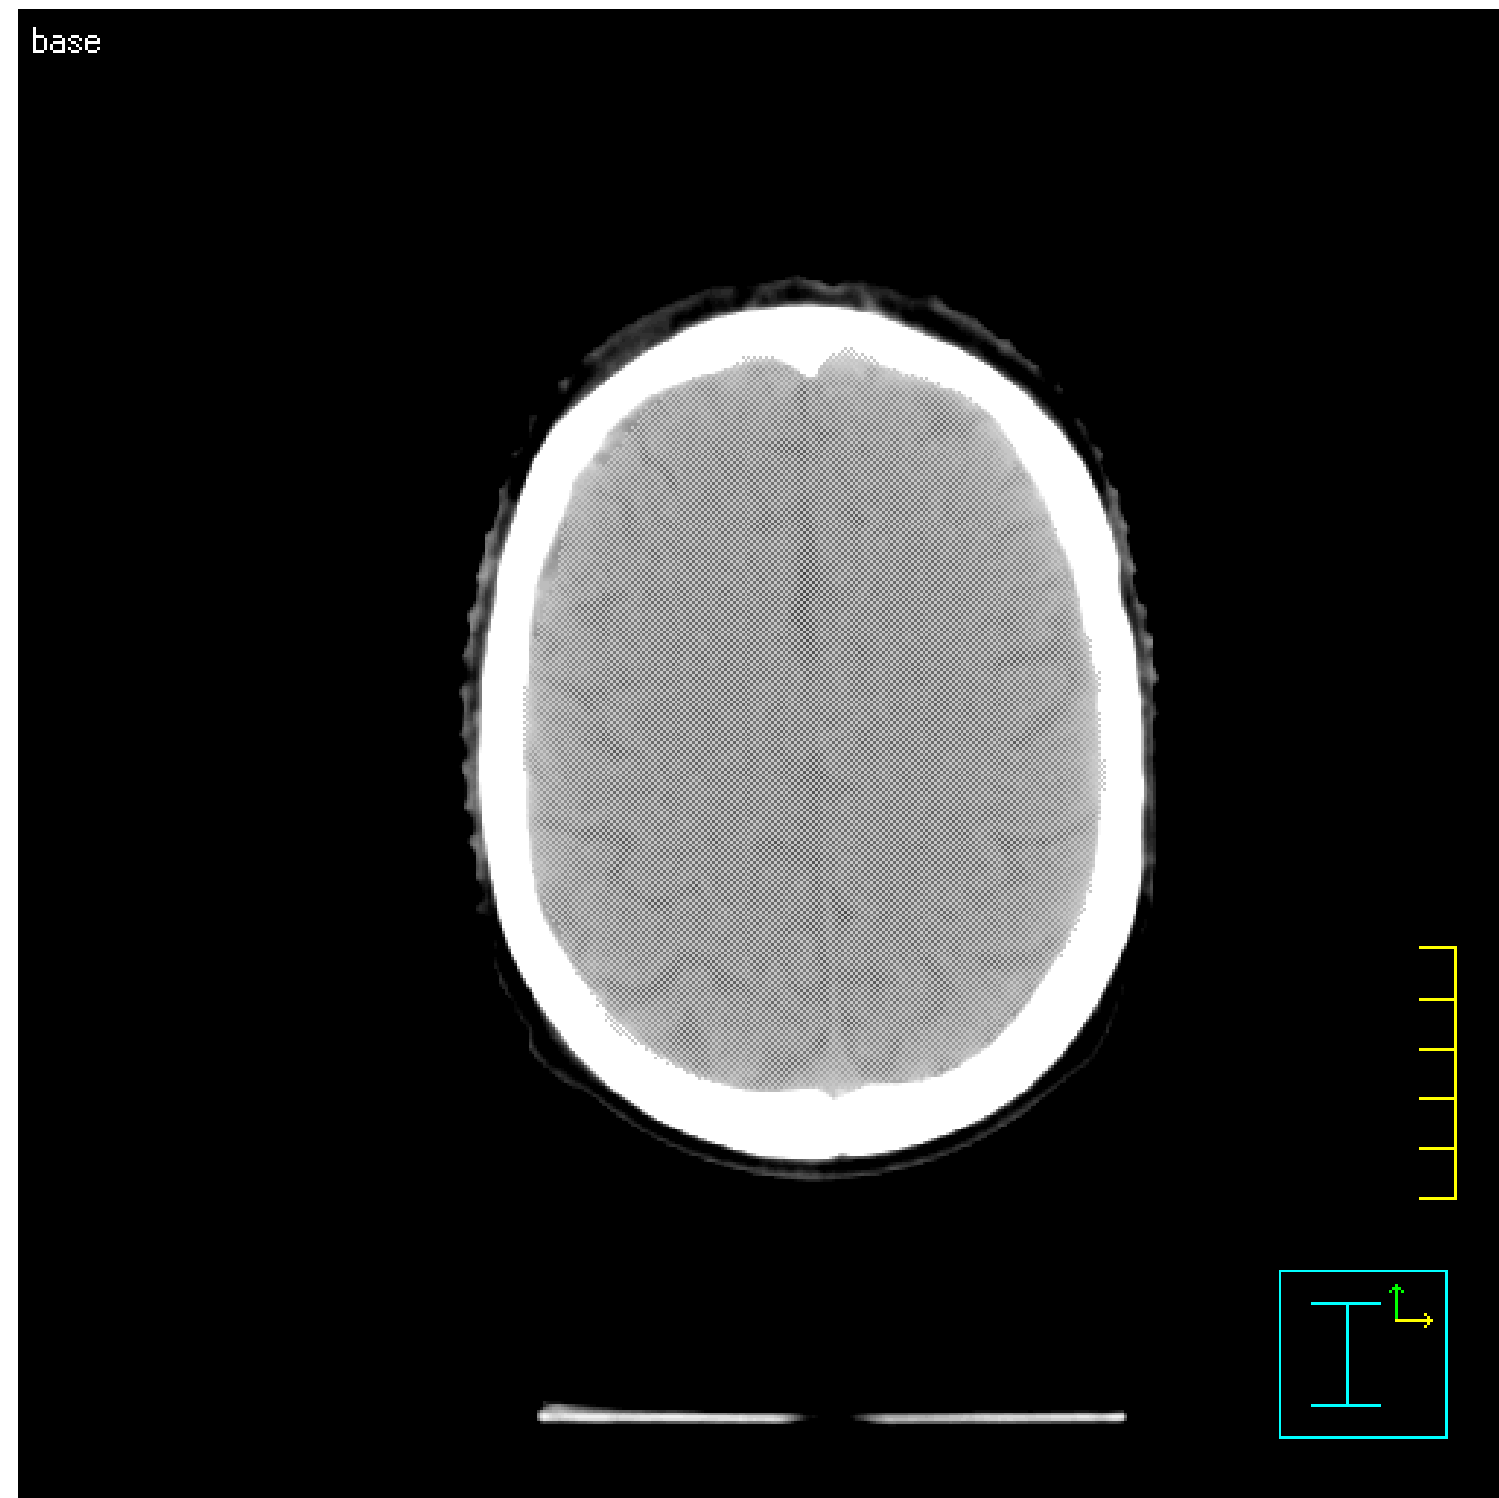

Patient Name: **Protocol ID: , Patient ID:**

Date / Time: Mon Oct 7 13:47:43 2013

Revision:

MRN:

Comment:

Planner:

Plan Name:

Physician / Physicist:

Institution:

Trial Name:

Pinnacle ID:

Links: [planDB](#)

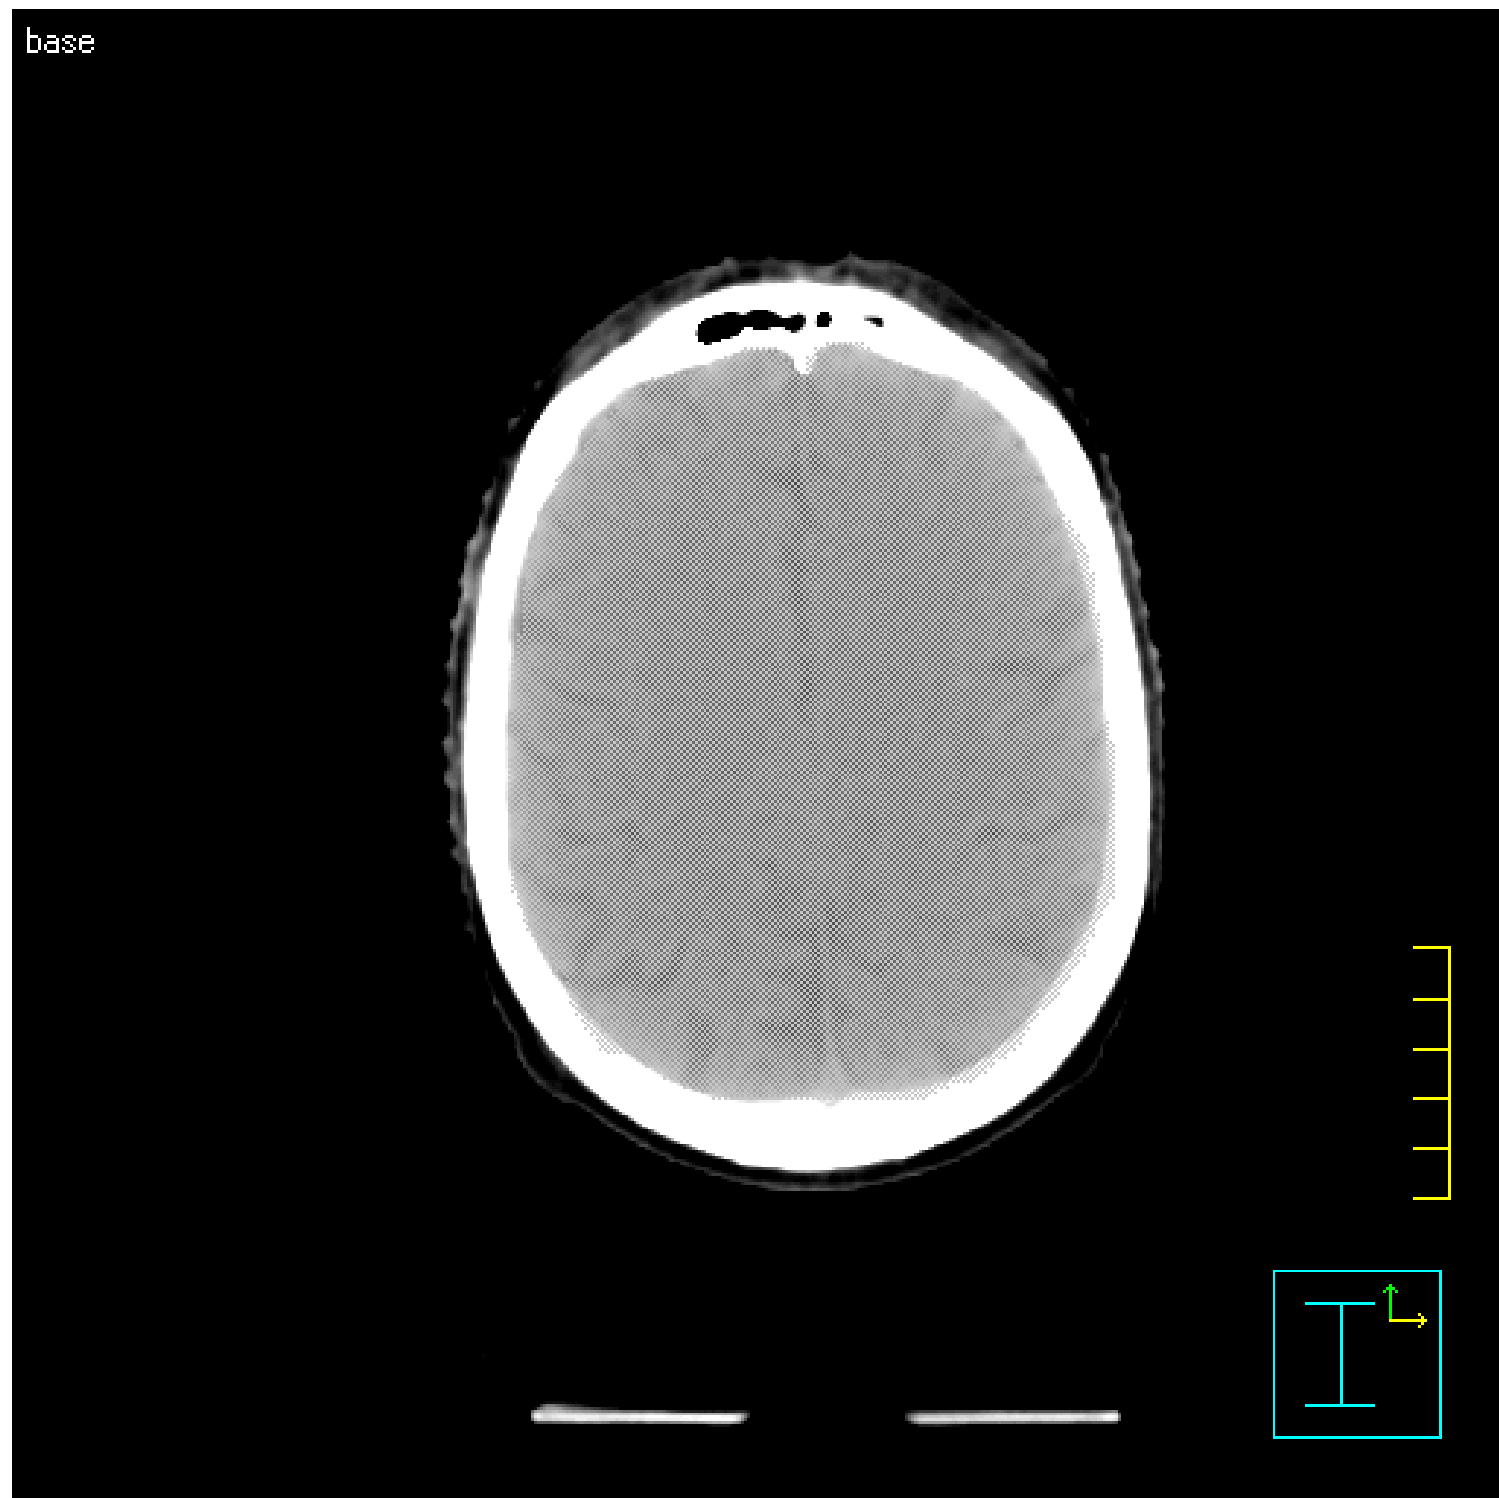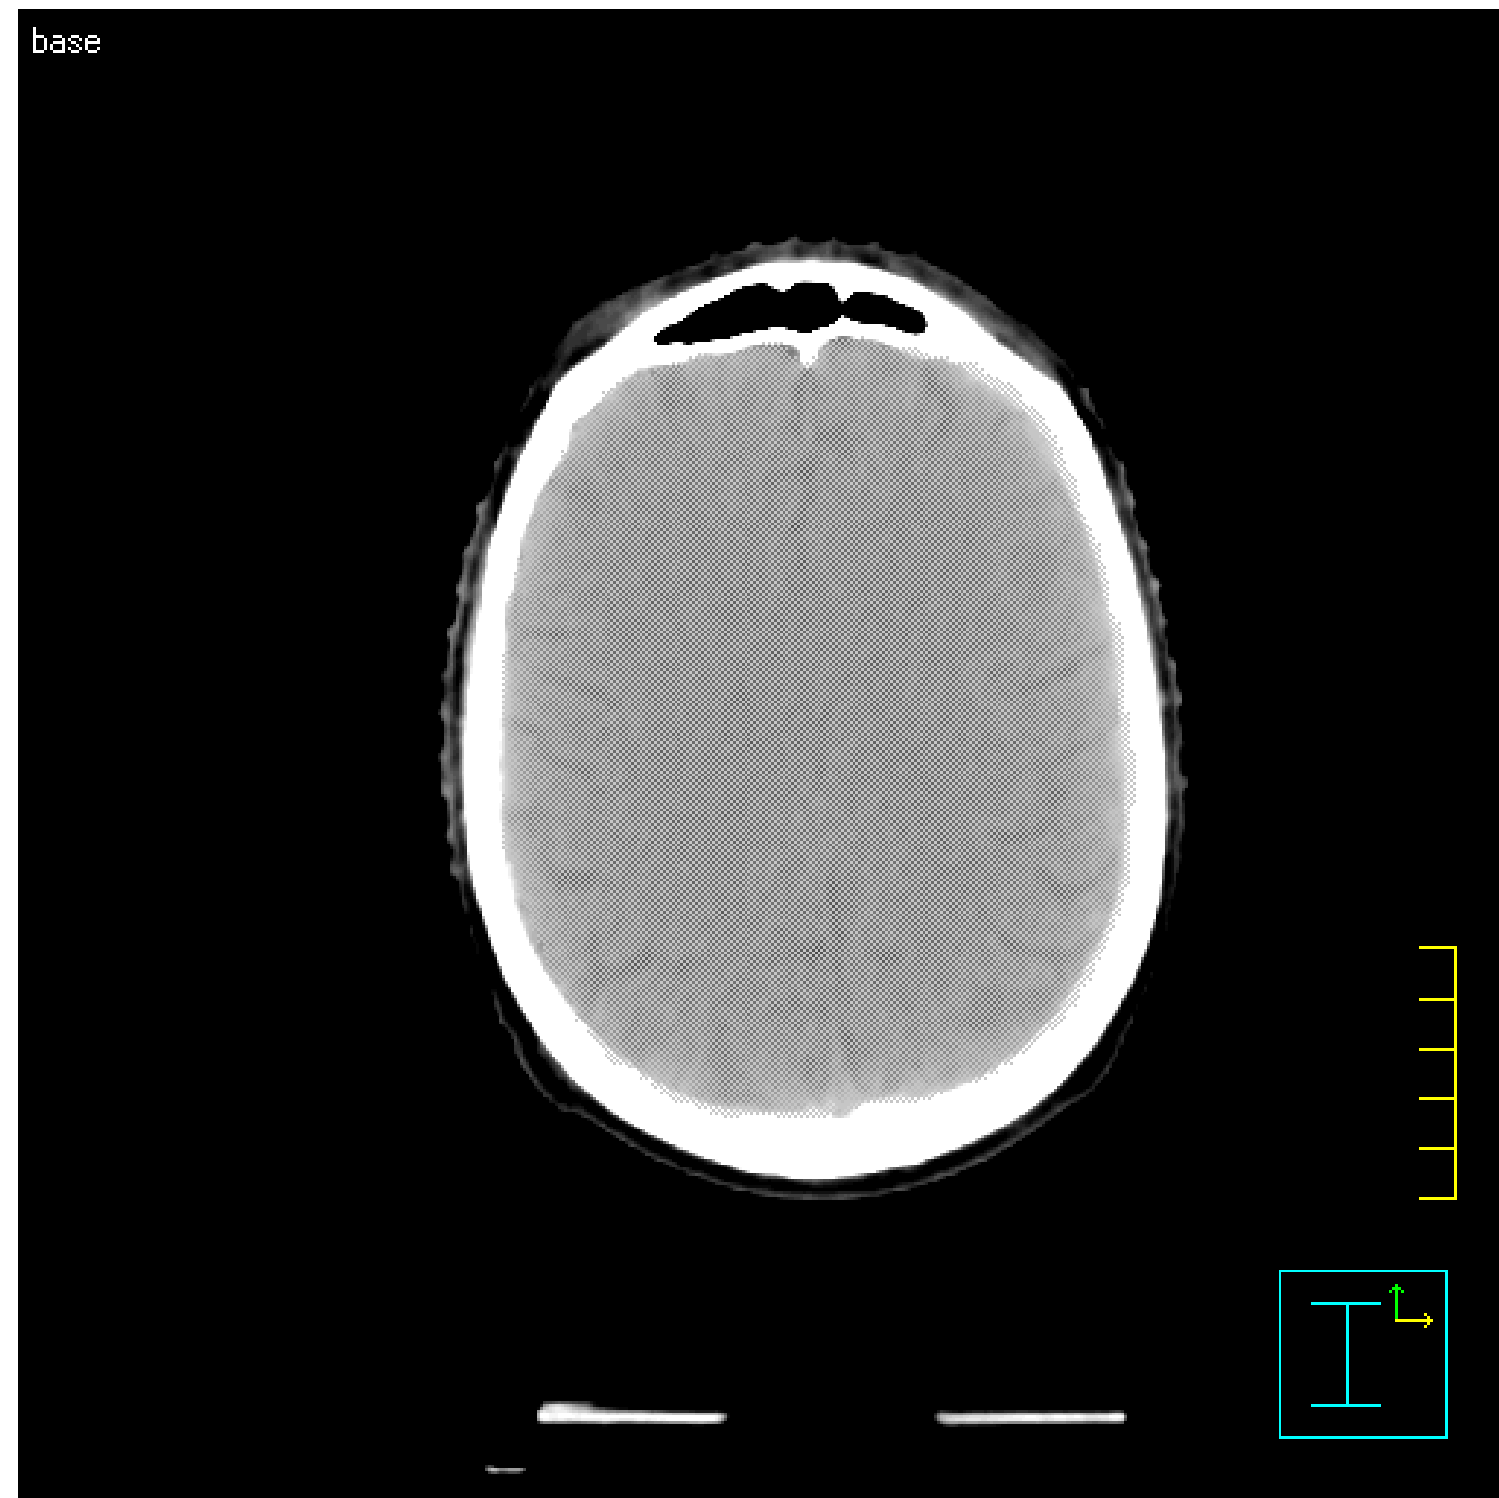

Patient Name: Protocol ID: , Patient ID:

Date / Time: Mon Oct 7 13:47:43 2013

Revision:

MRN:

Comment:

Planner:

Plan Name:

Physician / Physicist:

Institution:

Trial Name:

Pinnacle ID:

Links: [planDB](#)

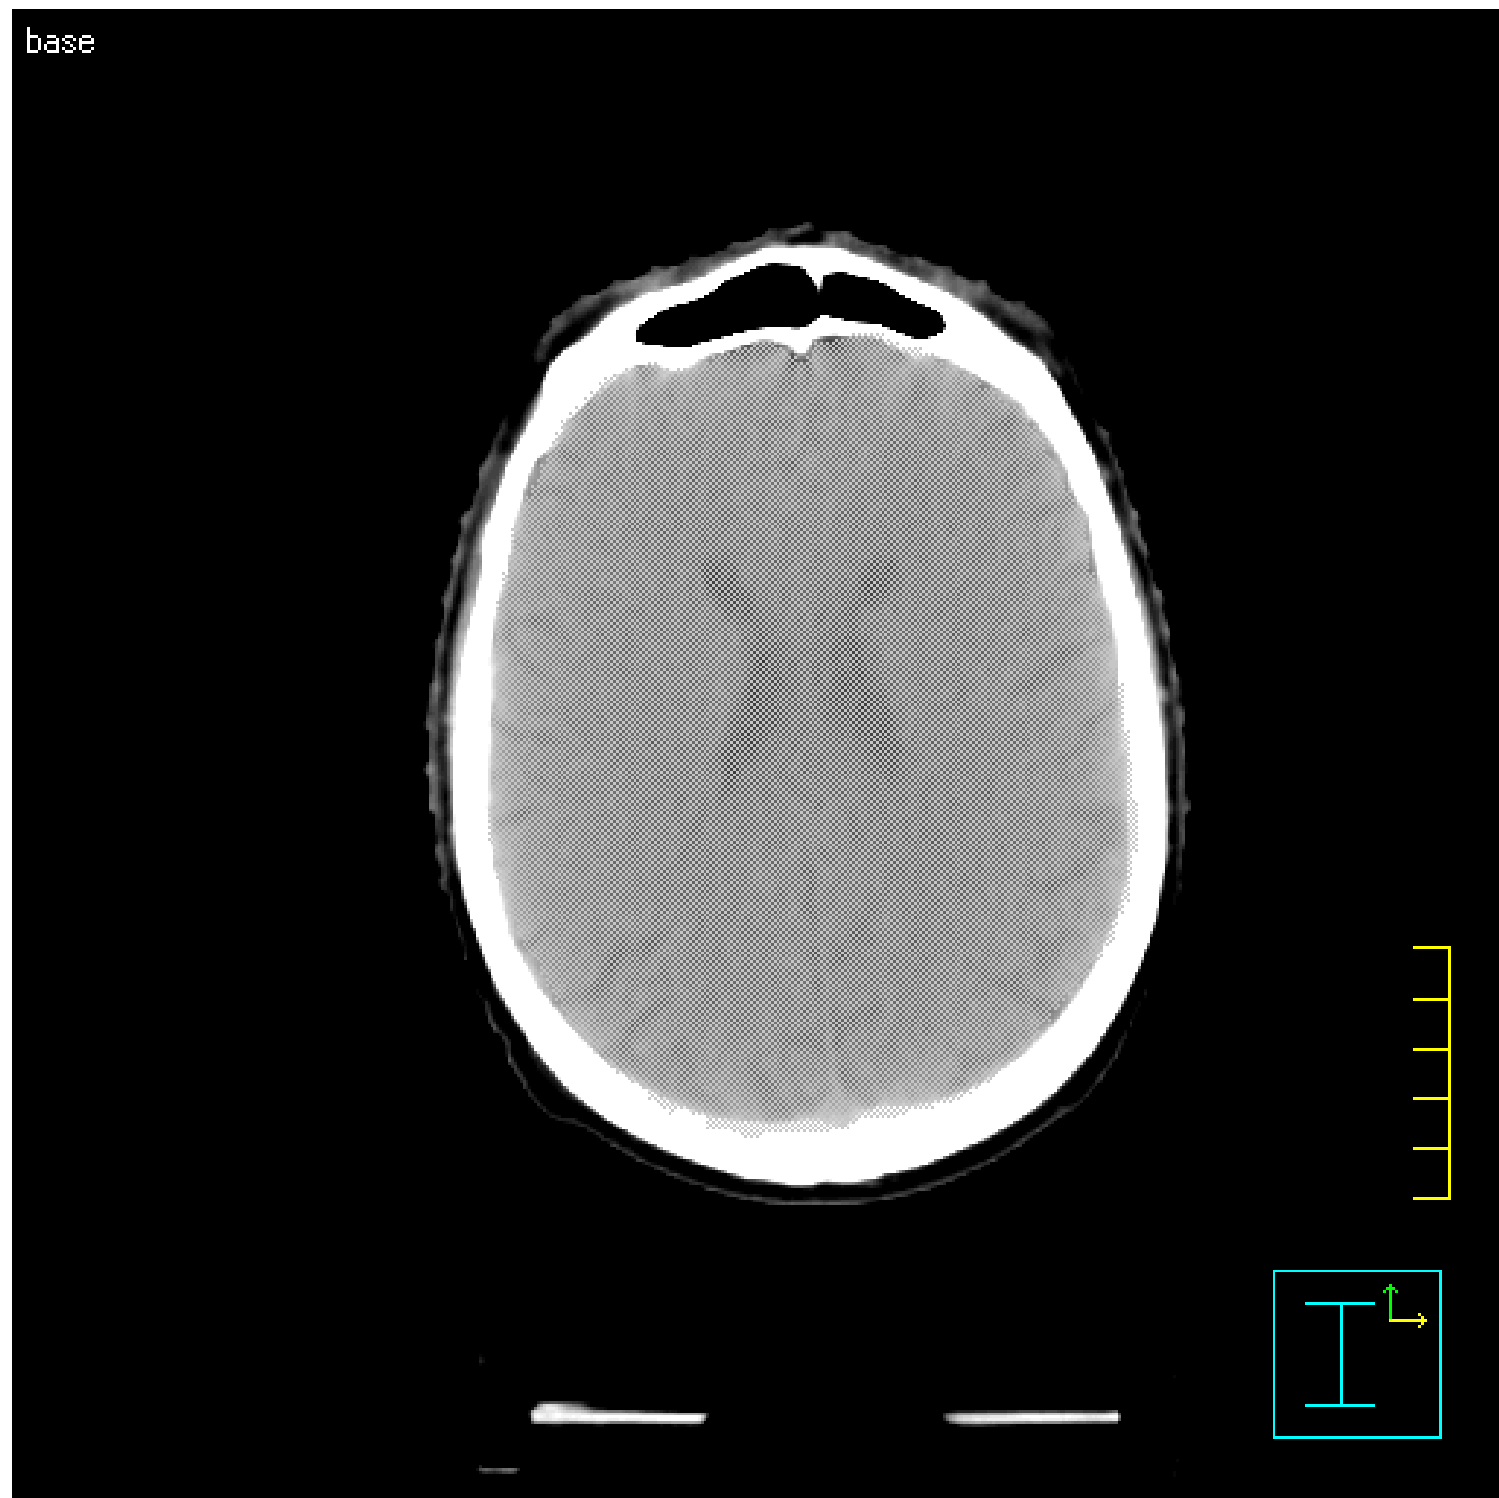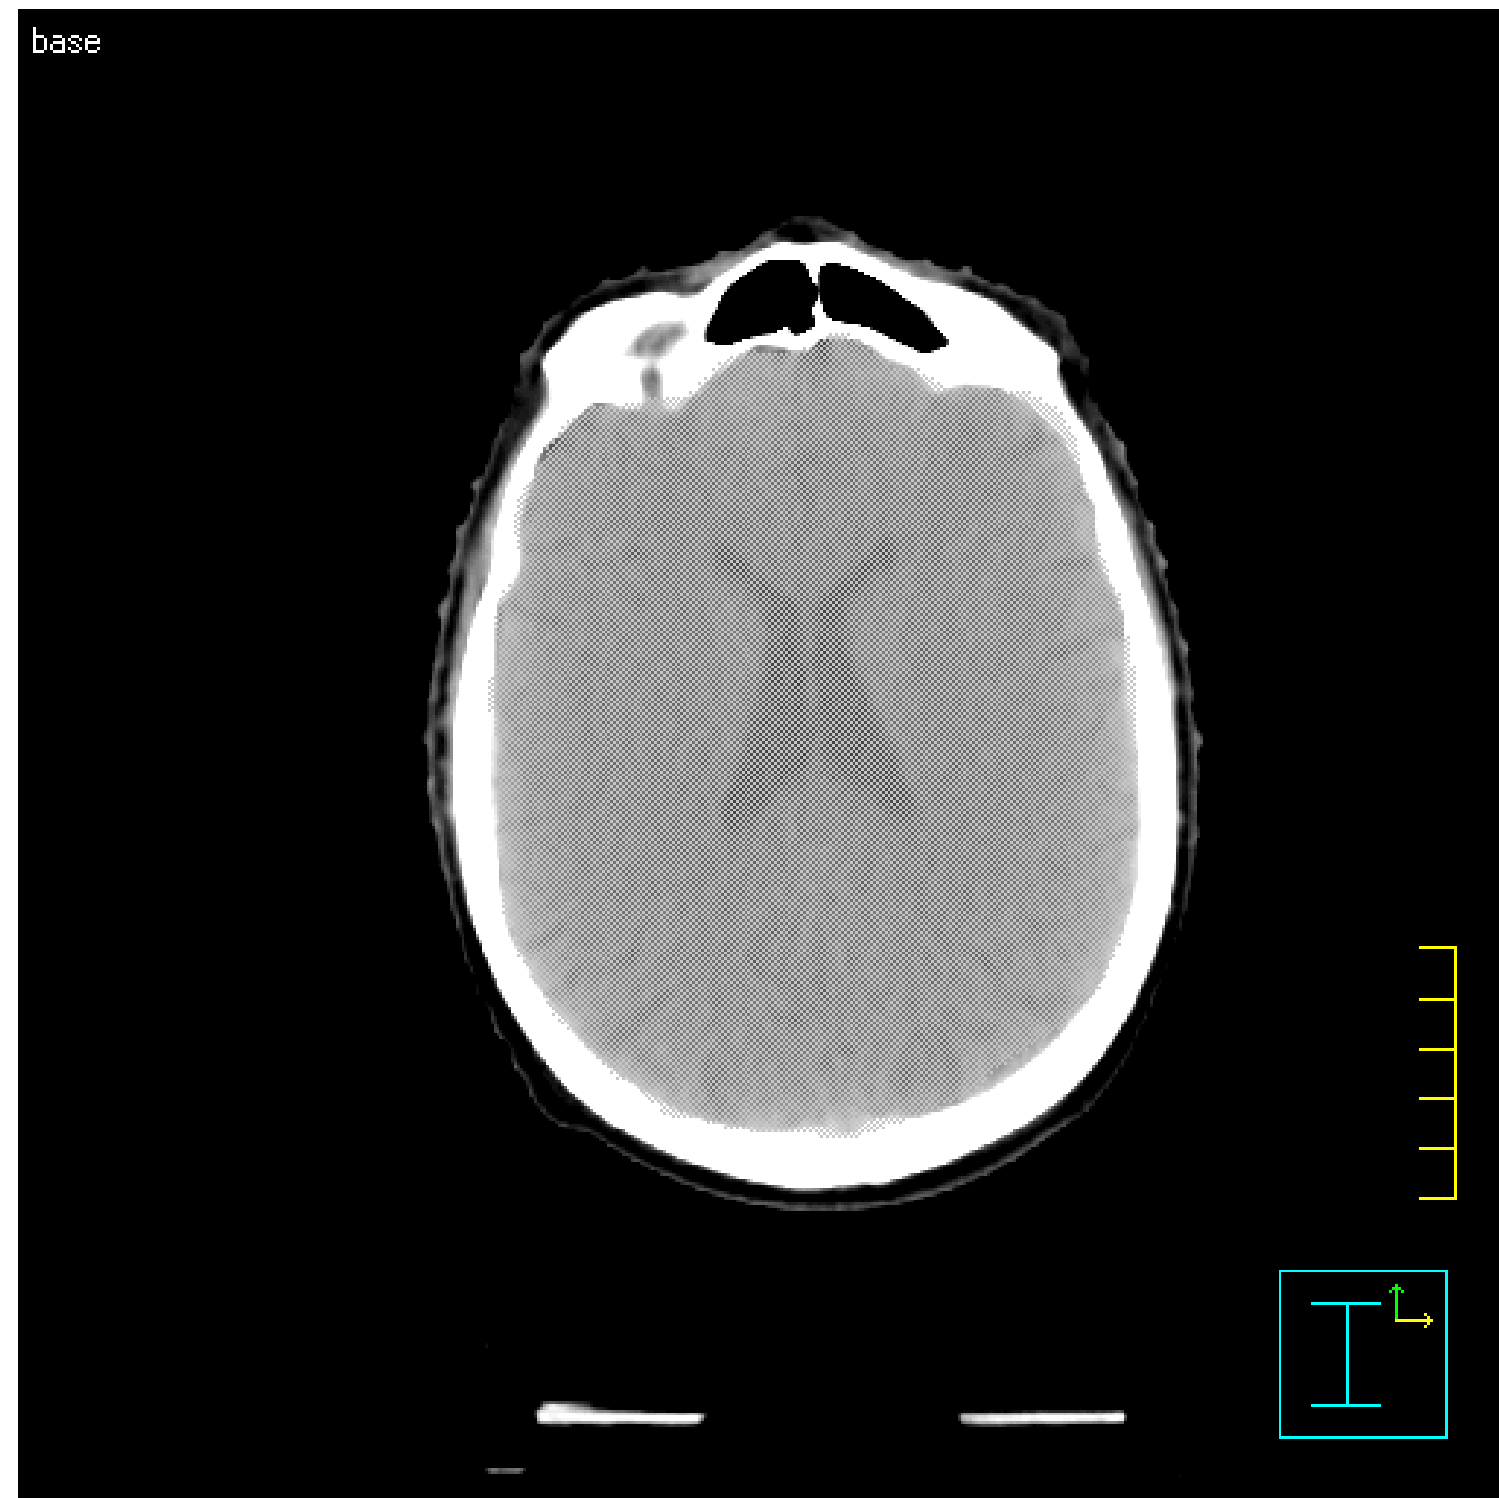

Patient Name: Protocol ID: , Patient ID:

Date / Time: Mon Oct 7 13:47:43 2013

Revision:

MRN:

Comment:

Planner:

Plan Name:

Physician / Physicist:

Institution:

Trial Name:

Pinnacle ID:

Links: [planDB](#)

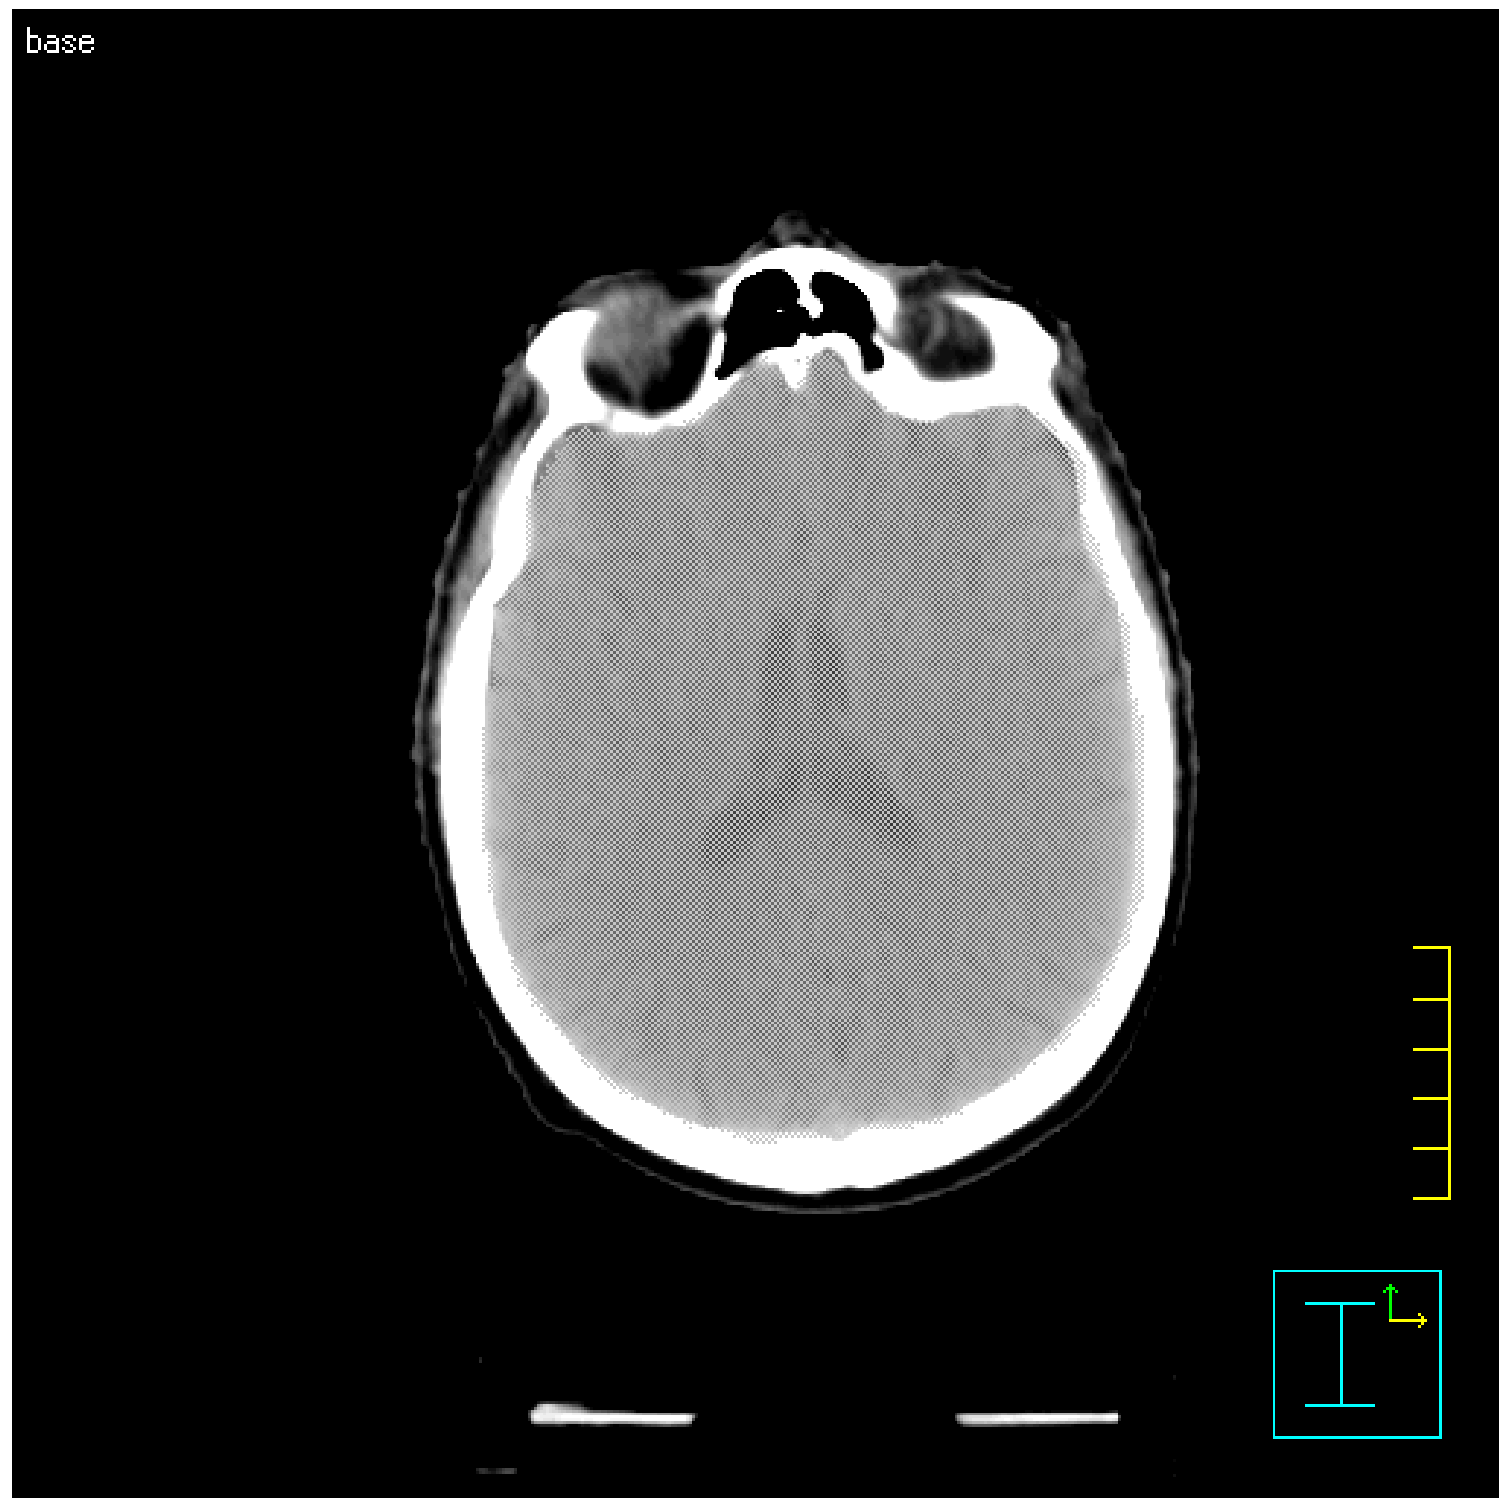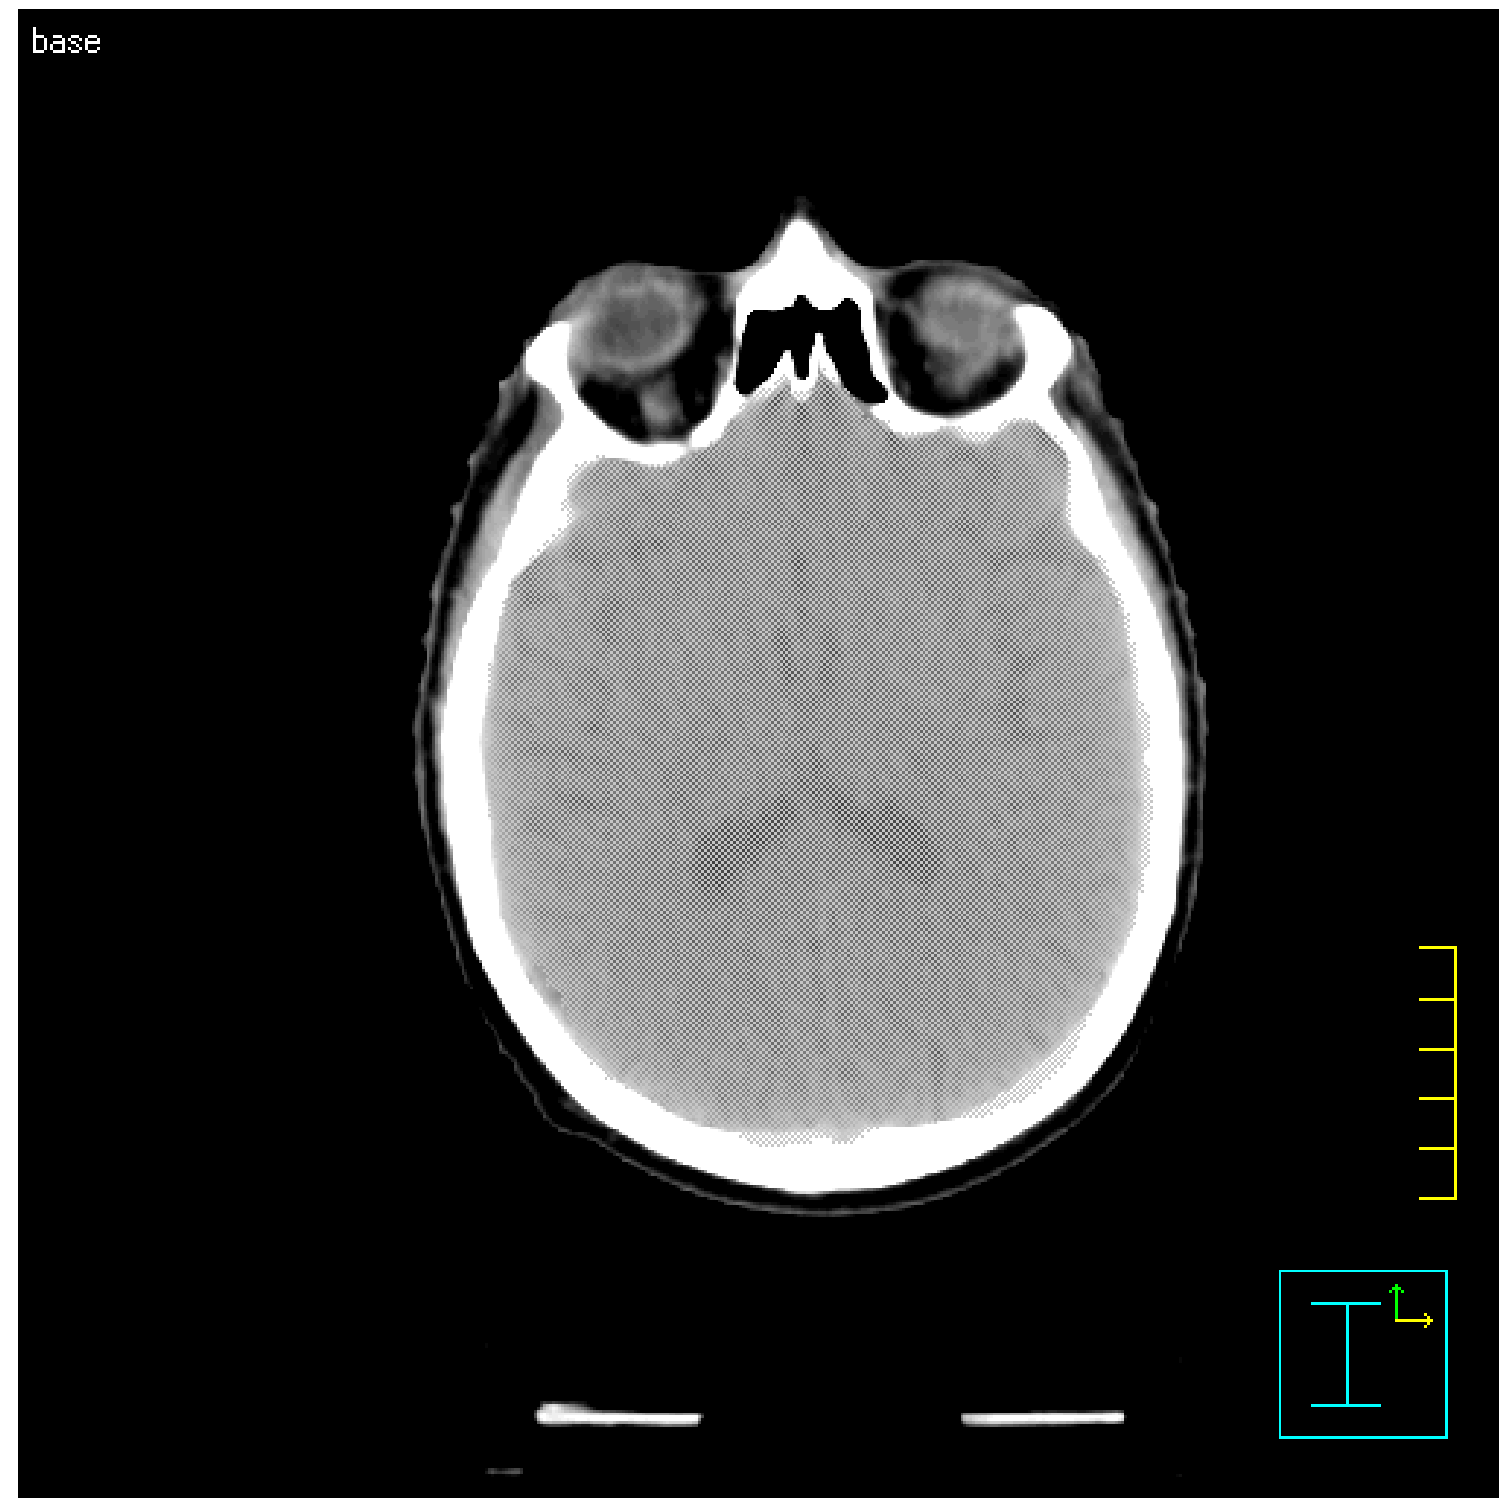



Patient Name: **Protocol ID: , Patient ID:**

Date / Time: Mon Oct 7 13:47:43 2013

Revision:

MRN:

Comment:

Planner:

Plan Name:

Physician / Physicist:

Institution:

Trial Name:

Pinnacle ID:

Links: [planDB](#)

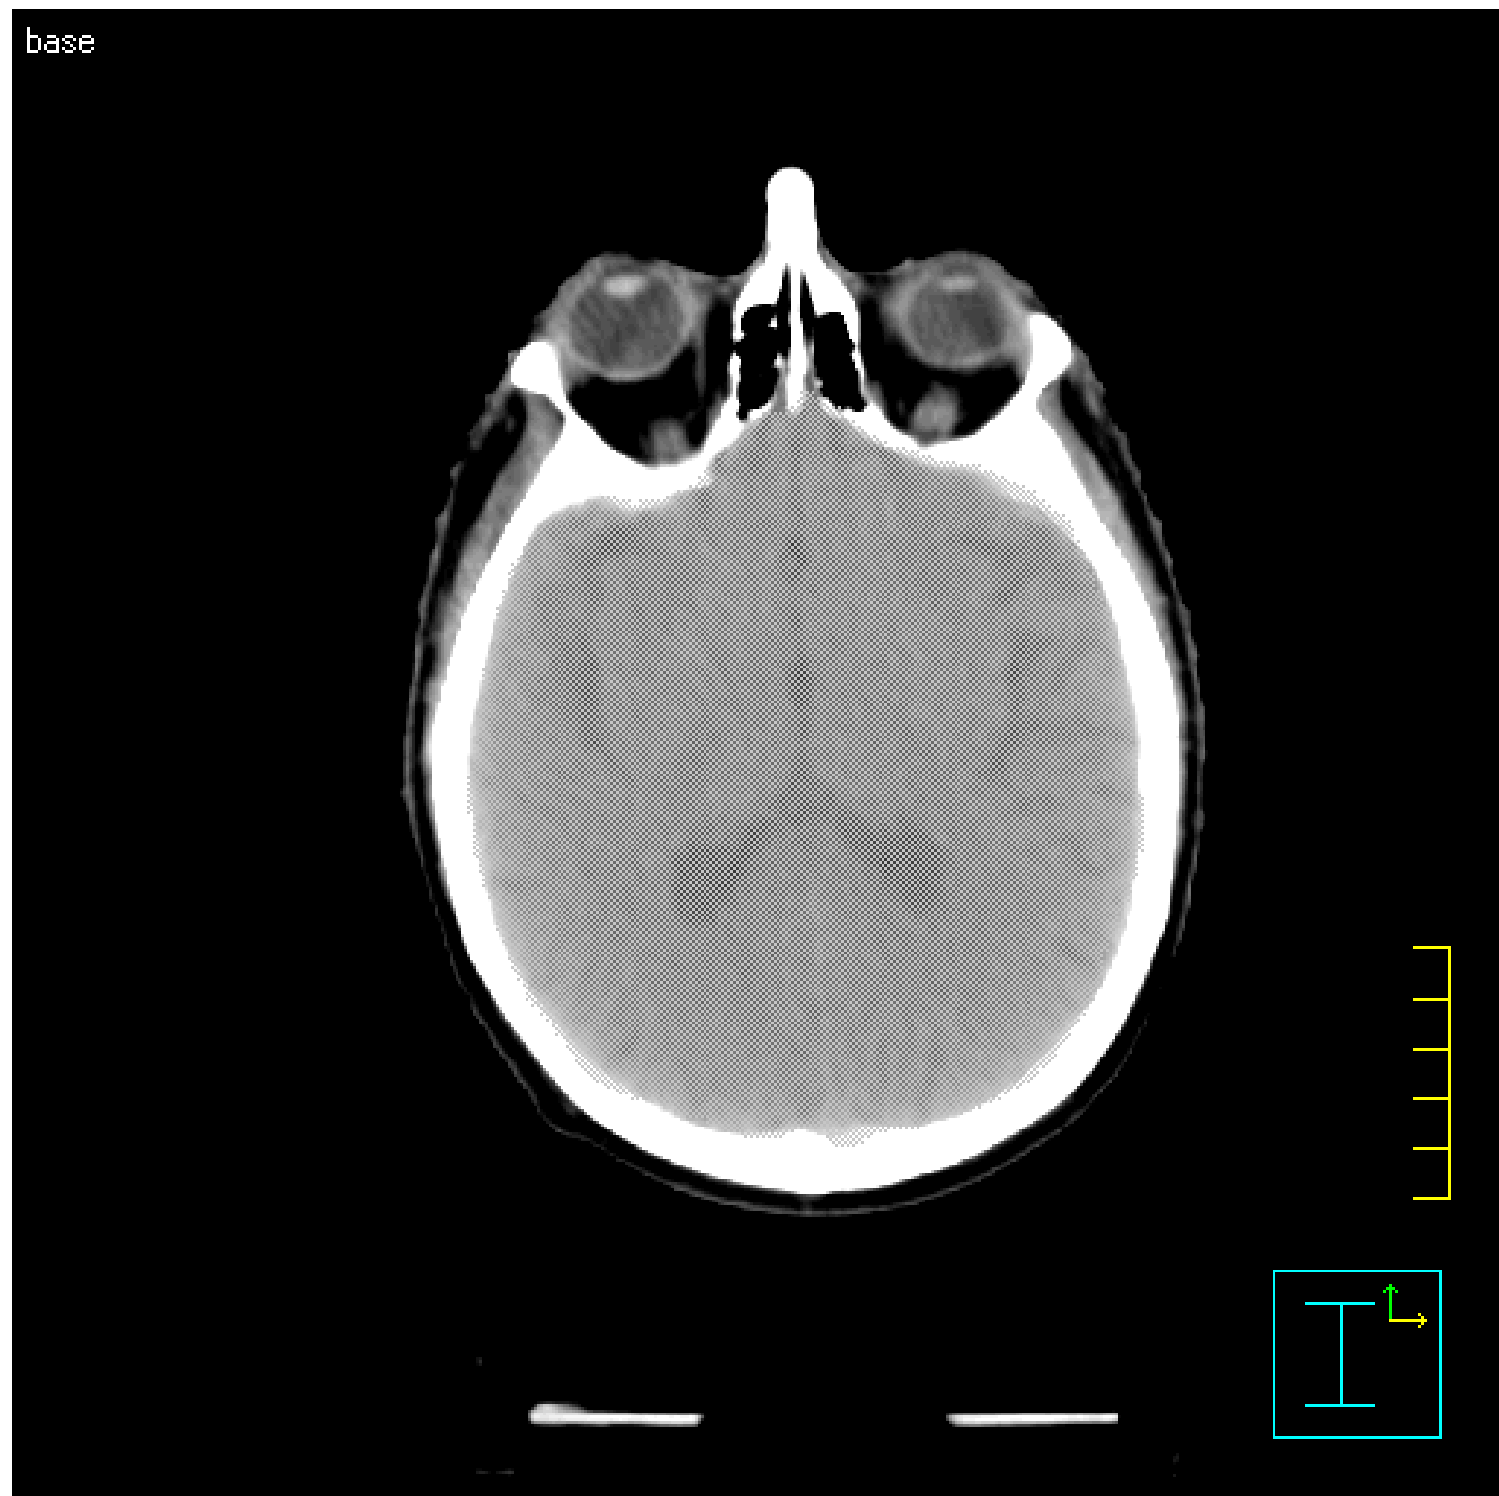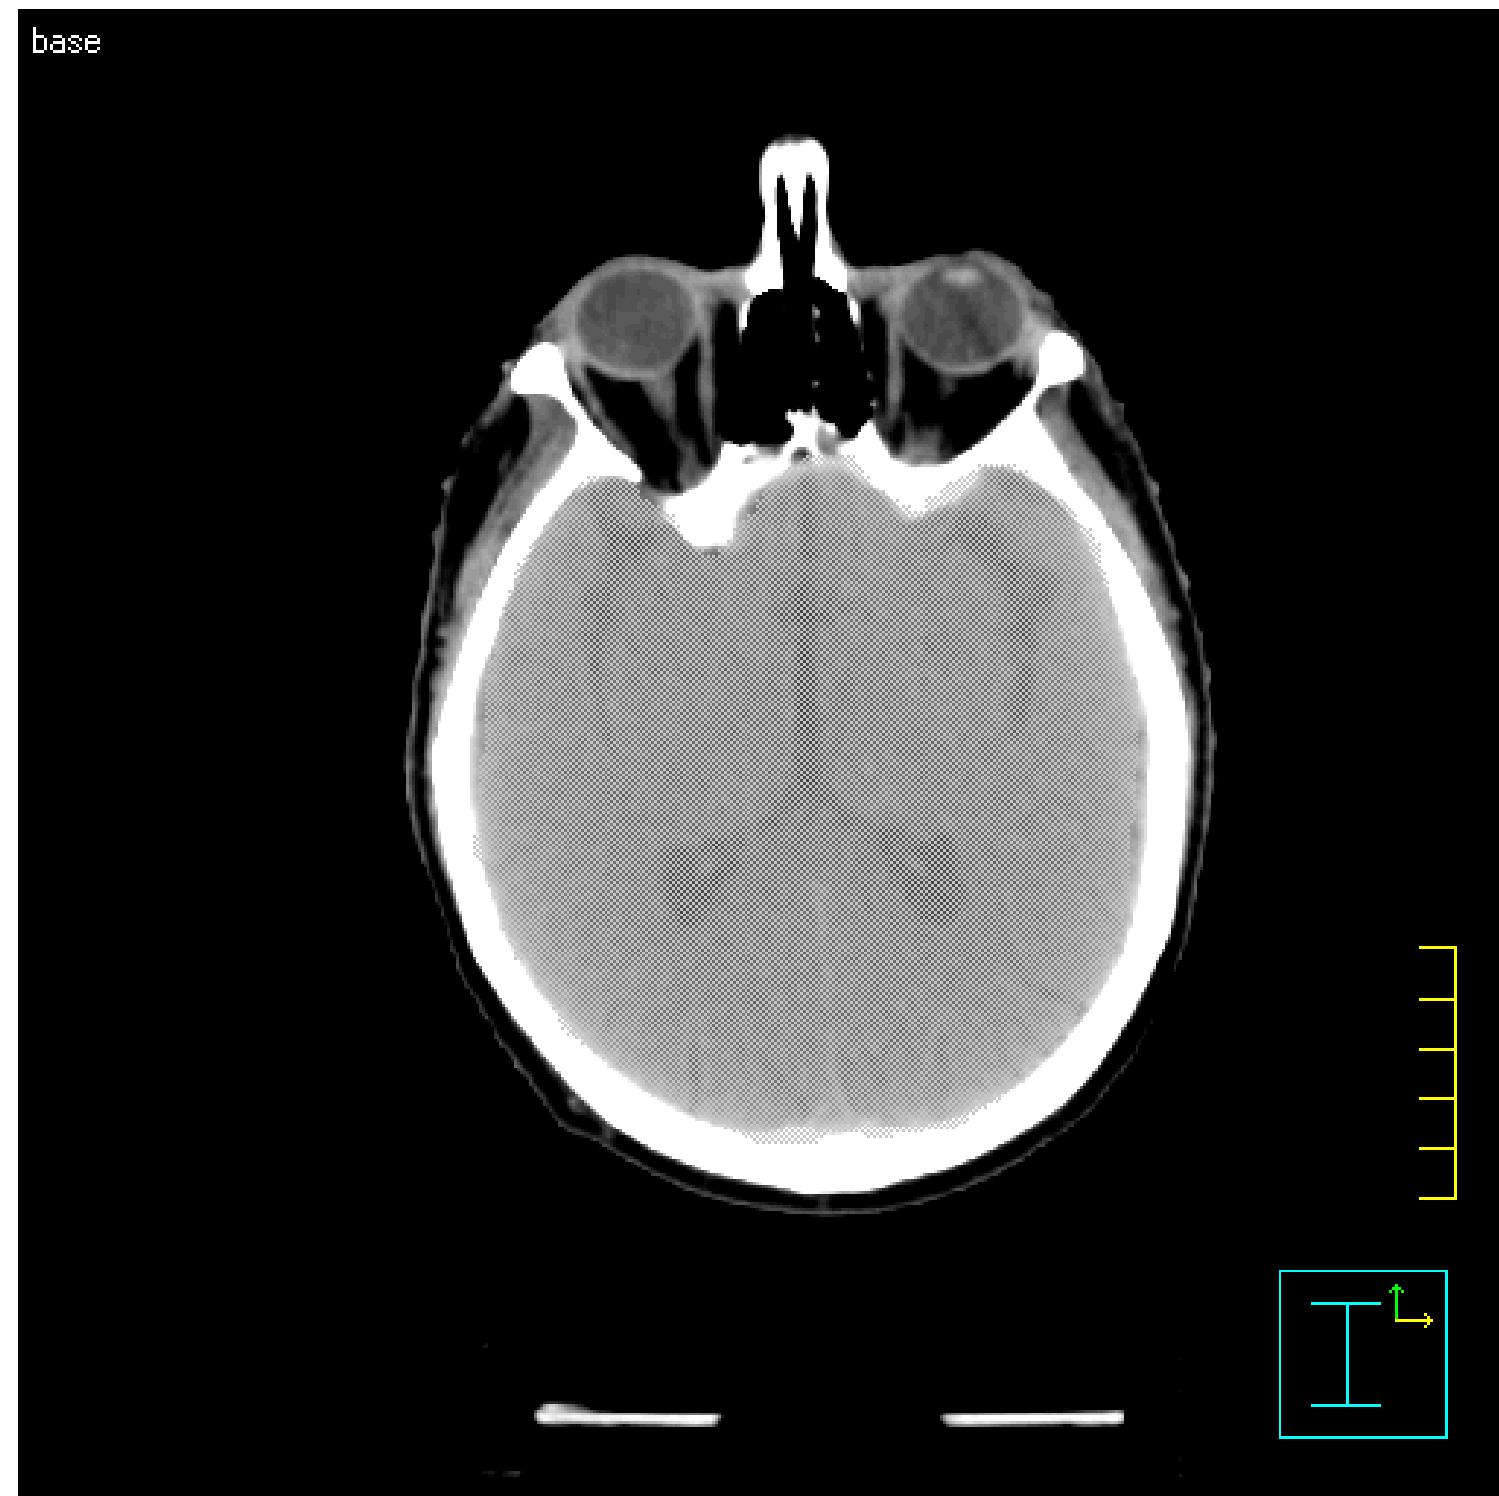

Patient Name: Protocol ID: , Patient ID:

Date / Time: Mon Oct 7 13:47:43 2013

Revision:

MRN:

Comment:

Planner:

Plan Name:

Physician / Physicist:

Institution:

Trial Name:

Pinnacle ID:

Links: [planDB](#)

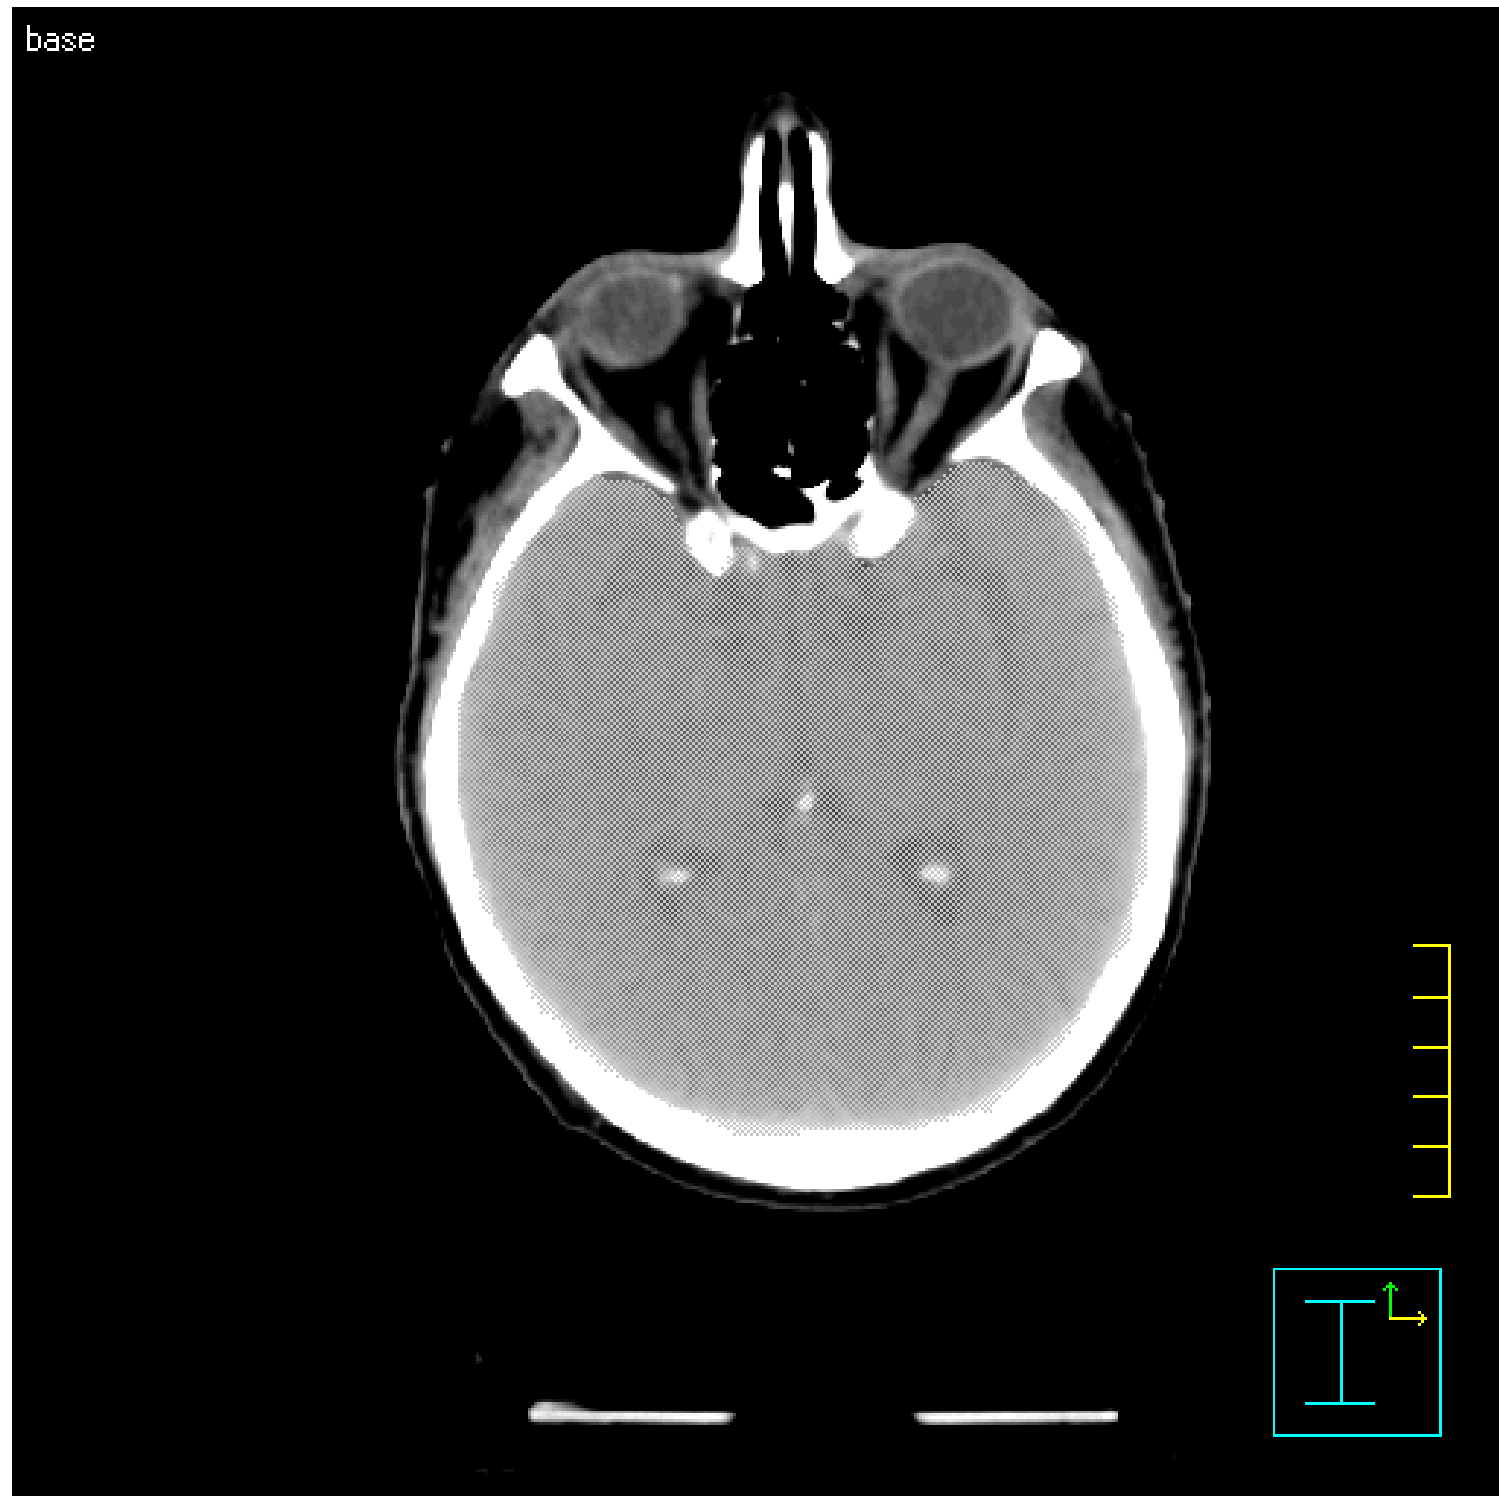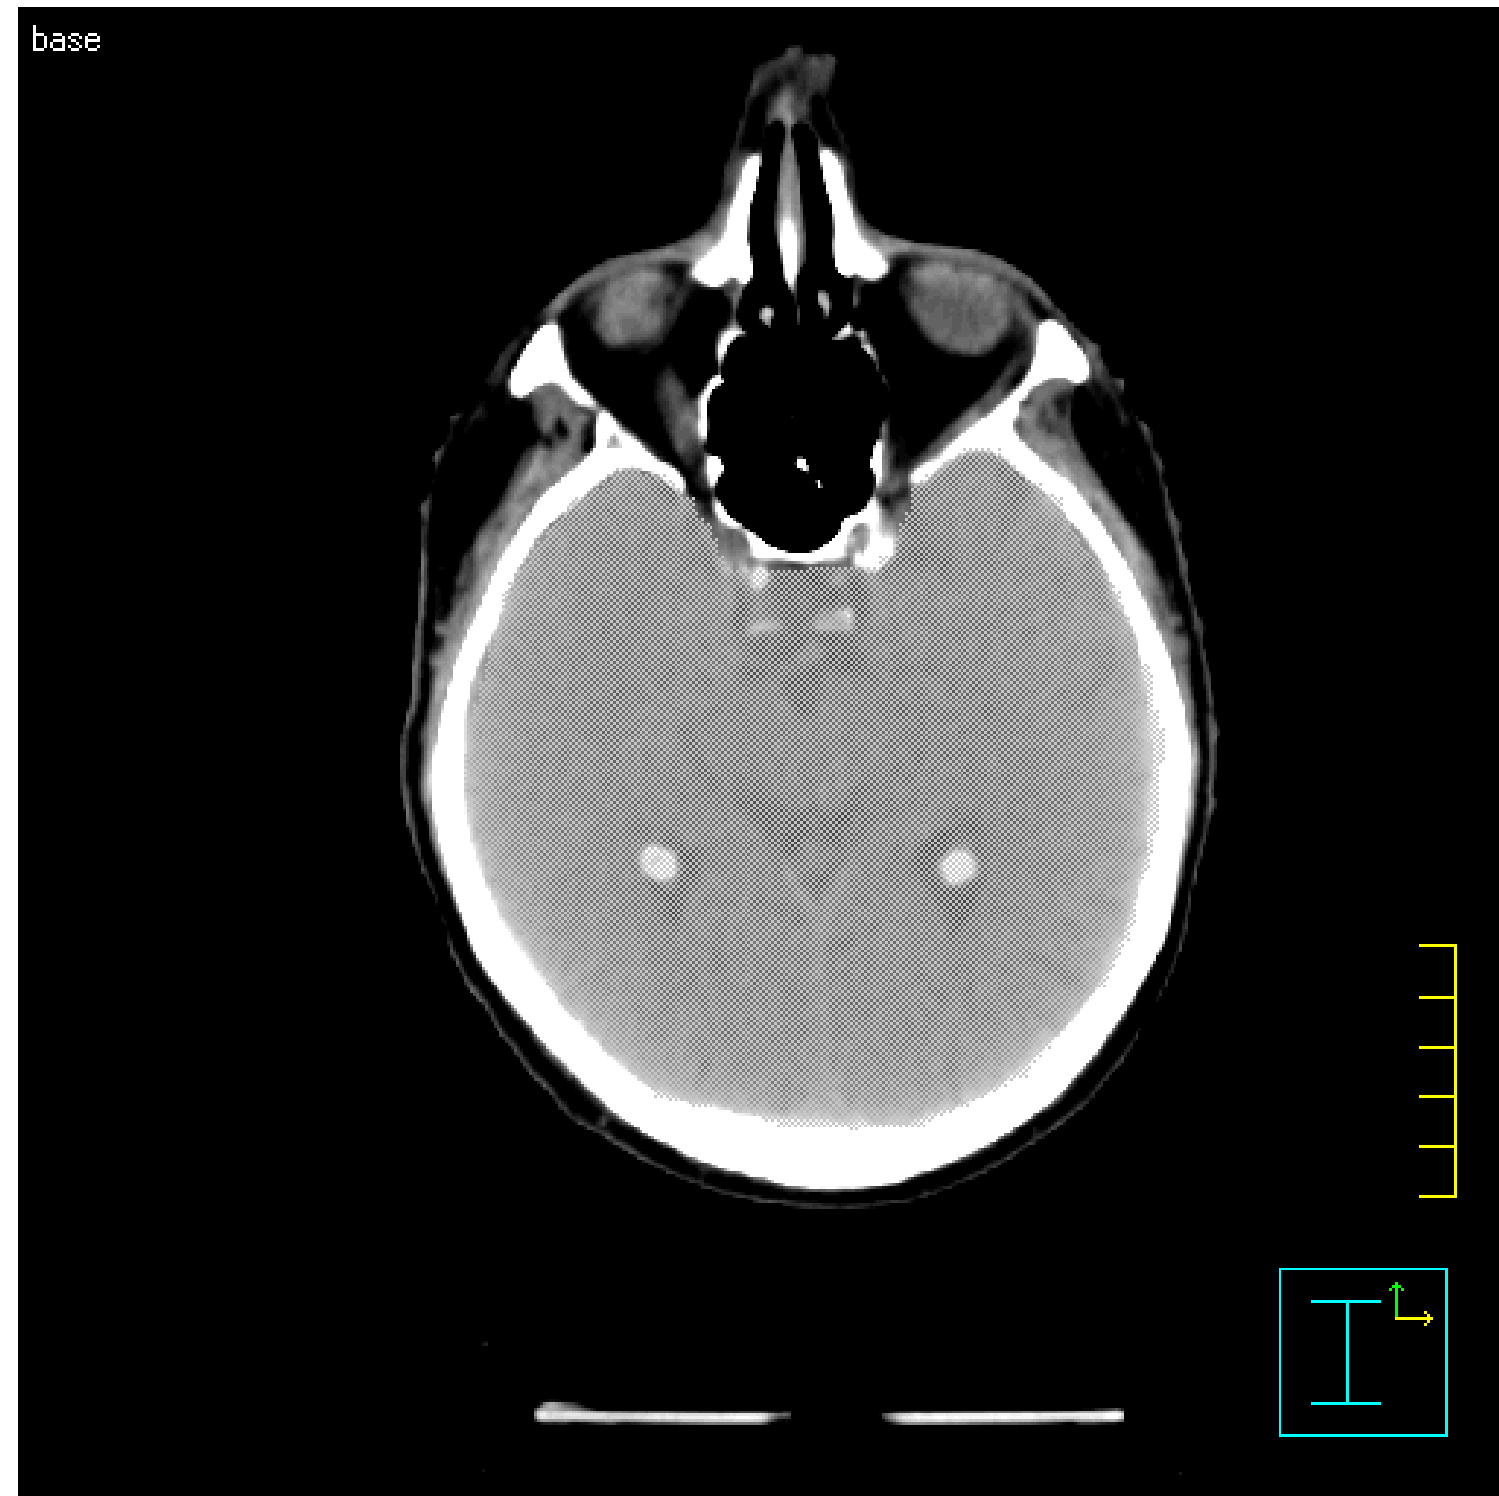

Patient Name: Protocol ID: , Patient ID:

Date / Time: Mon Oct 7 13:47:43 2013

Revision:

MRN:

Comment:

Planner:

Plan Name:

Physician / Physicist:

Institution:

Trial Name:

Pinnacle ID:

Links: [planDB](#)

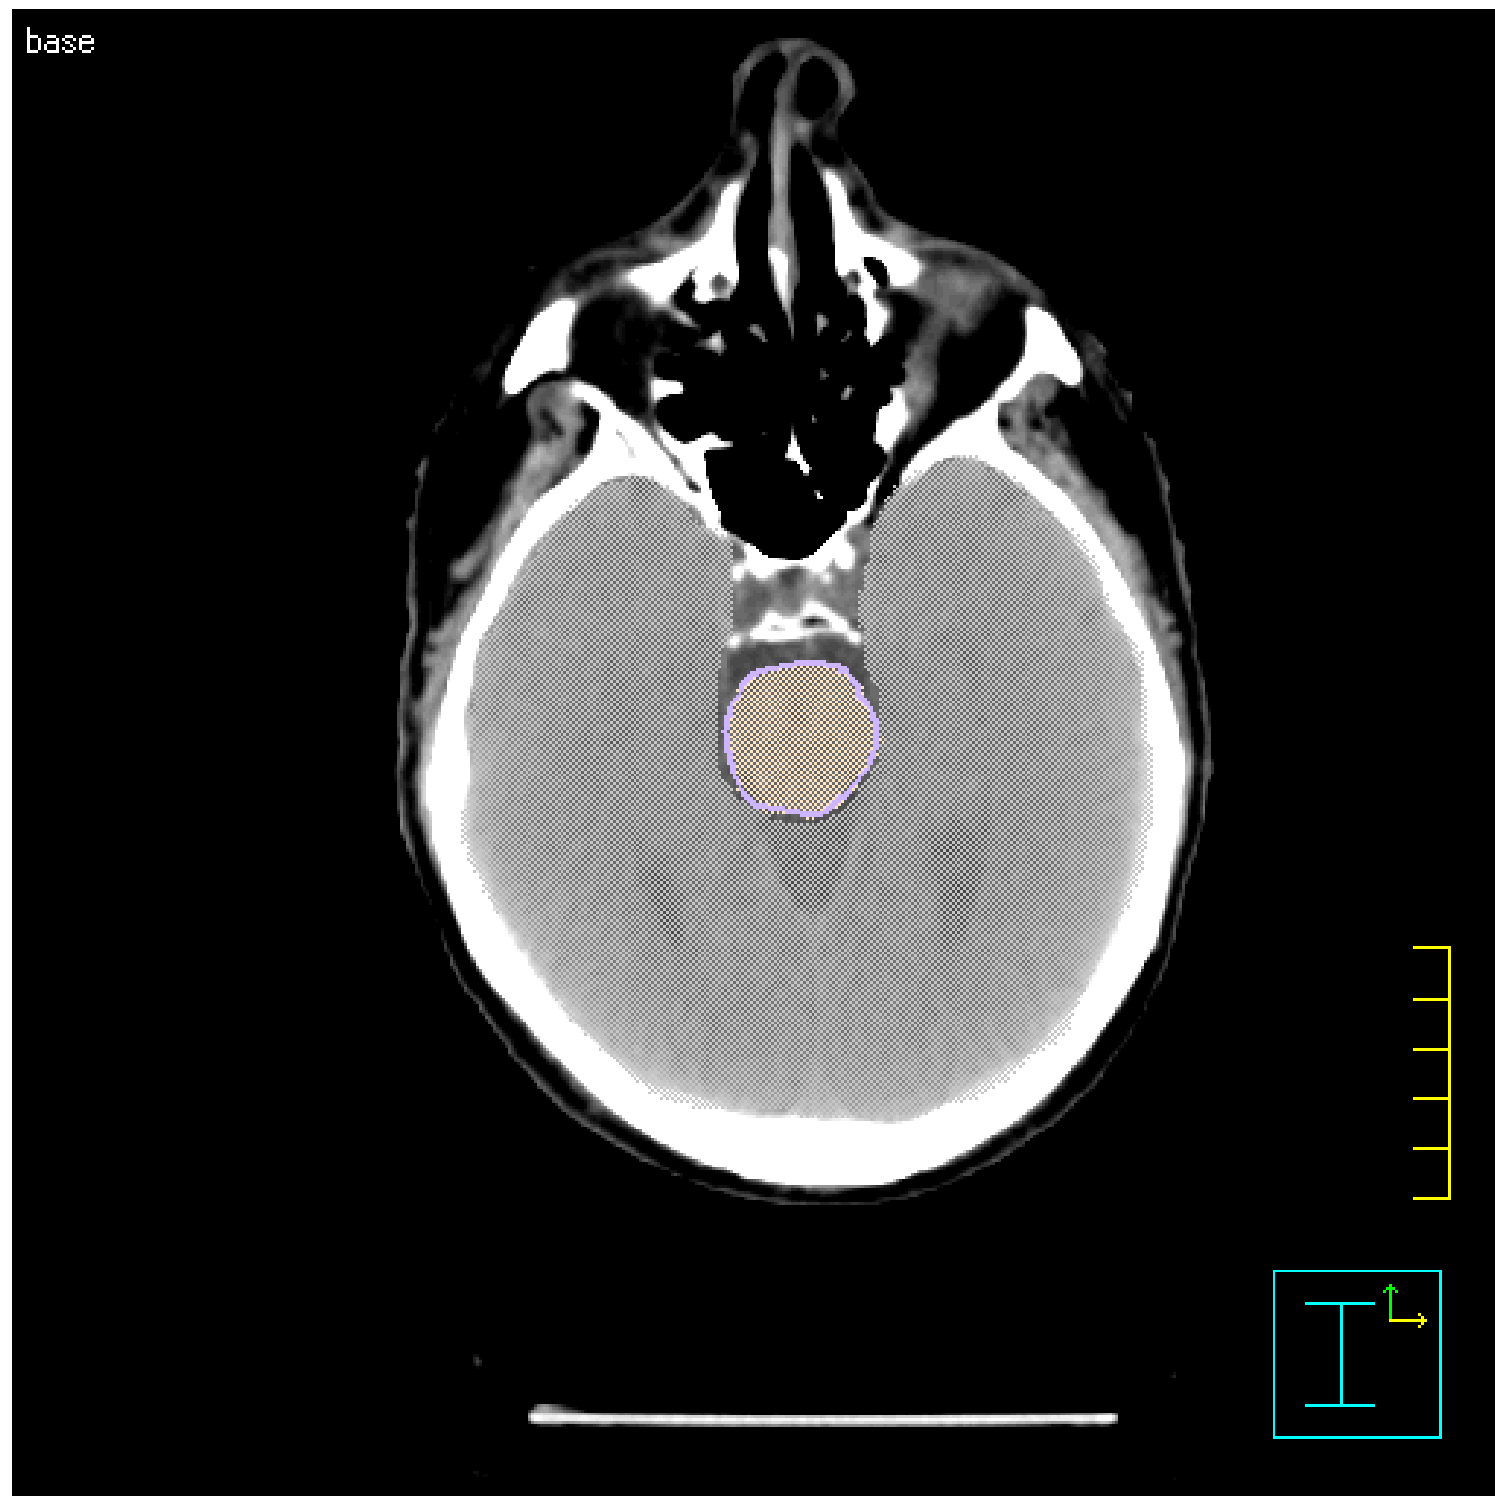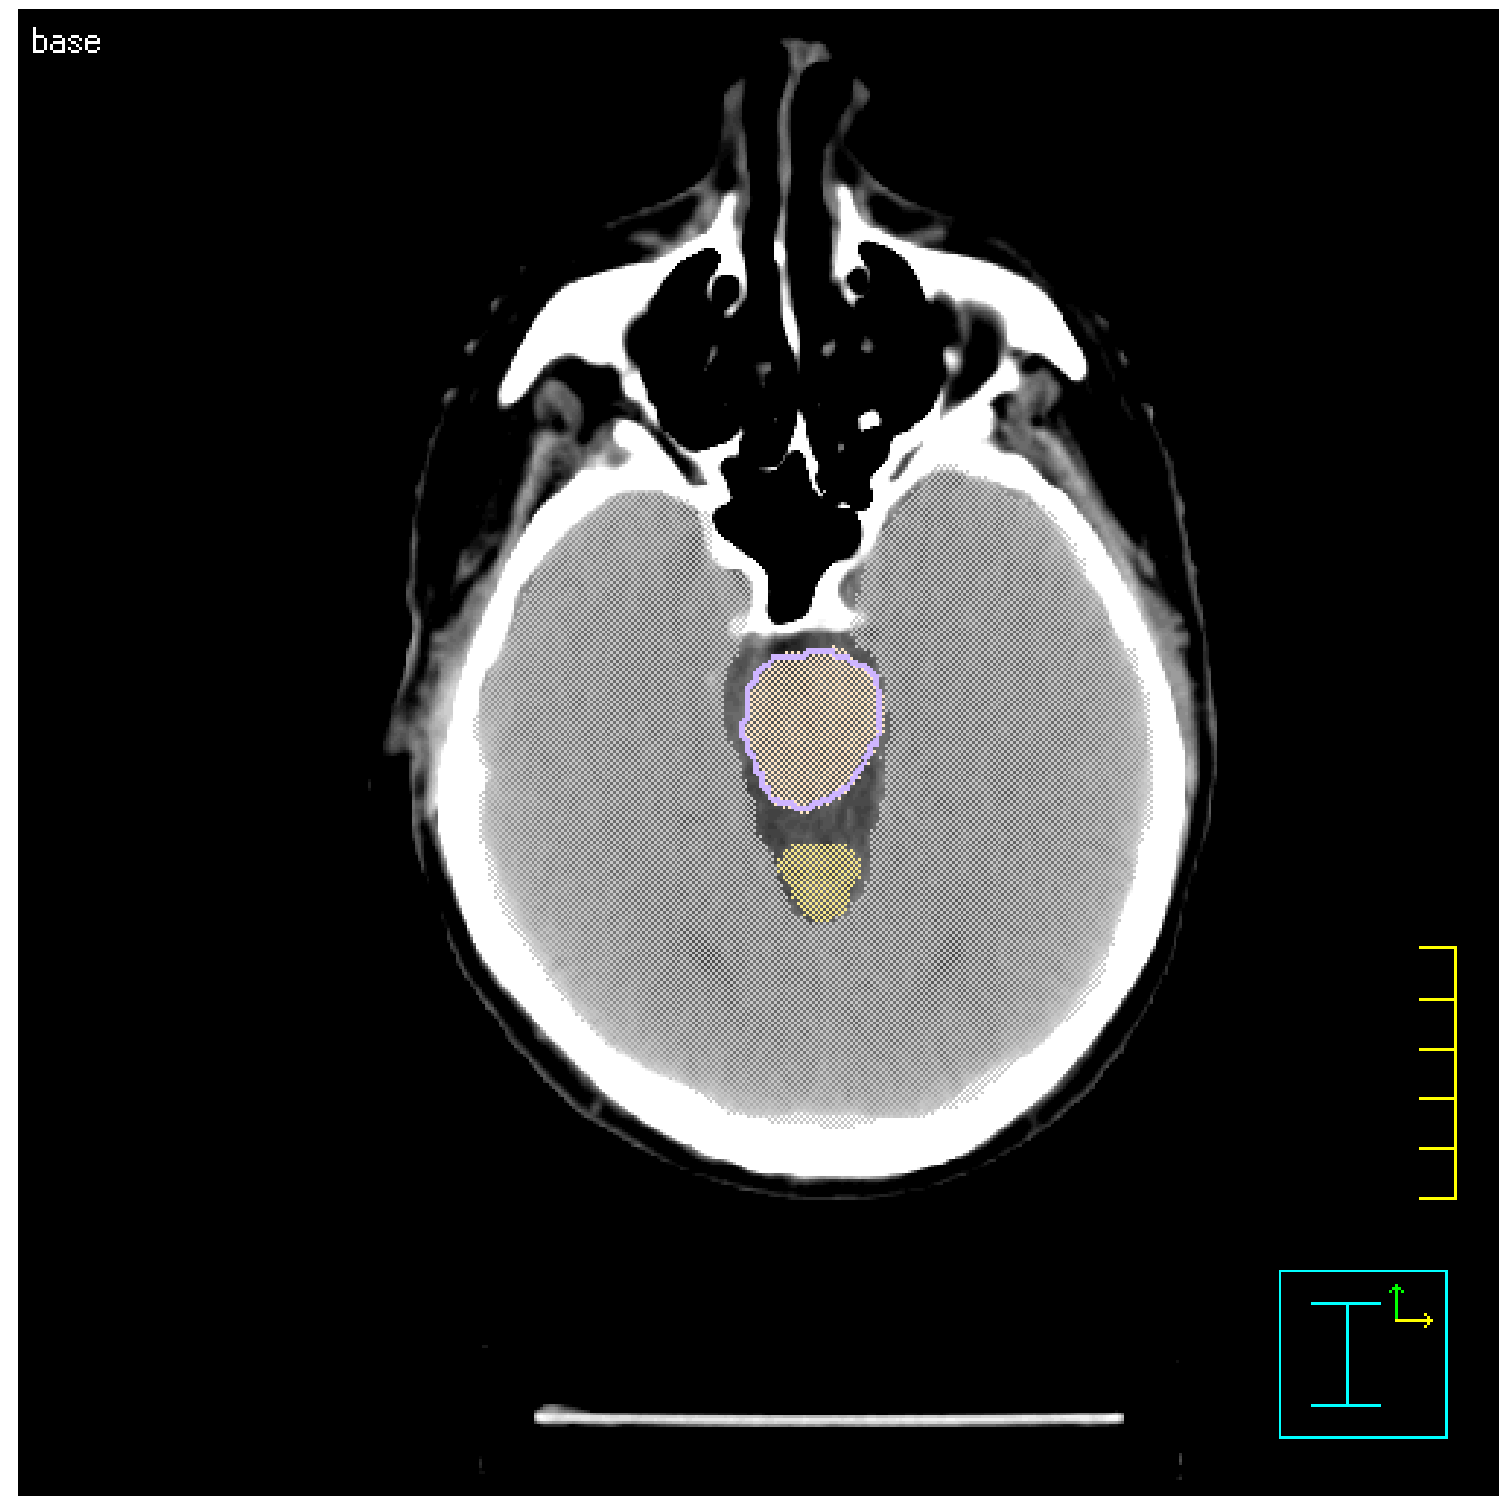

Patient Name: Protocol ID: , Patient ID:

Date / Time: Mon Oct 7 13:47:43 2013

Revision:

MRN:

Comment:

Planner:

Plan Name:

Physician / Physicist:

Institution:

Trial Name:

Pinnacle ID:

Links: [planDB](#)

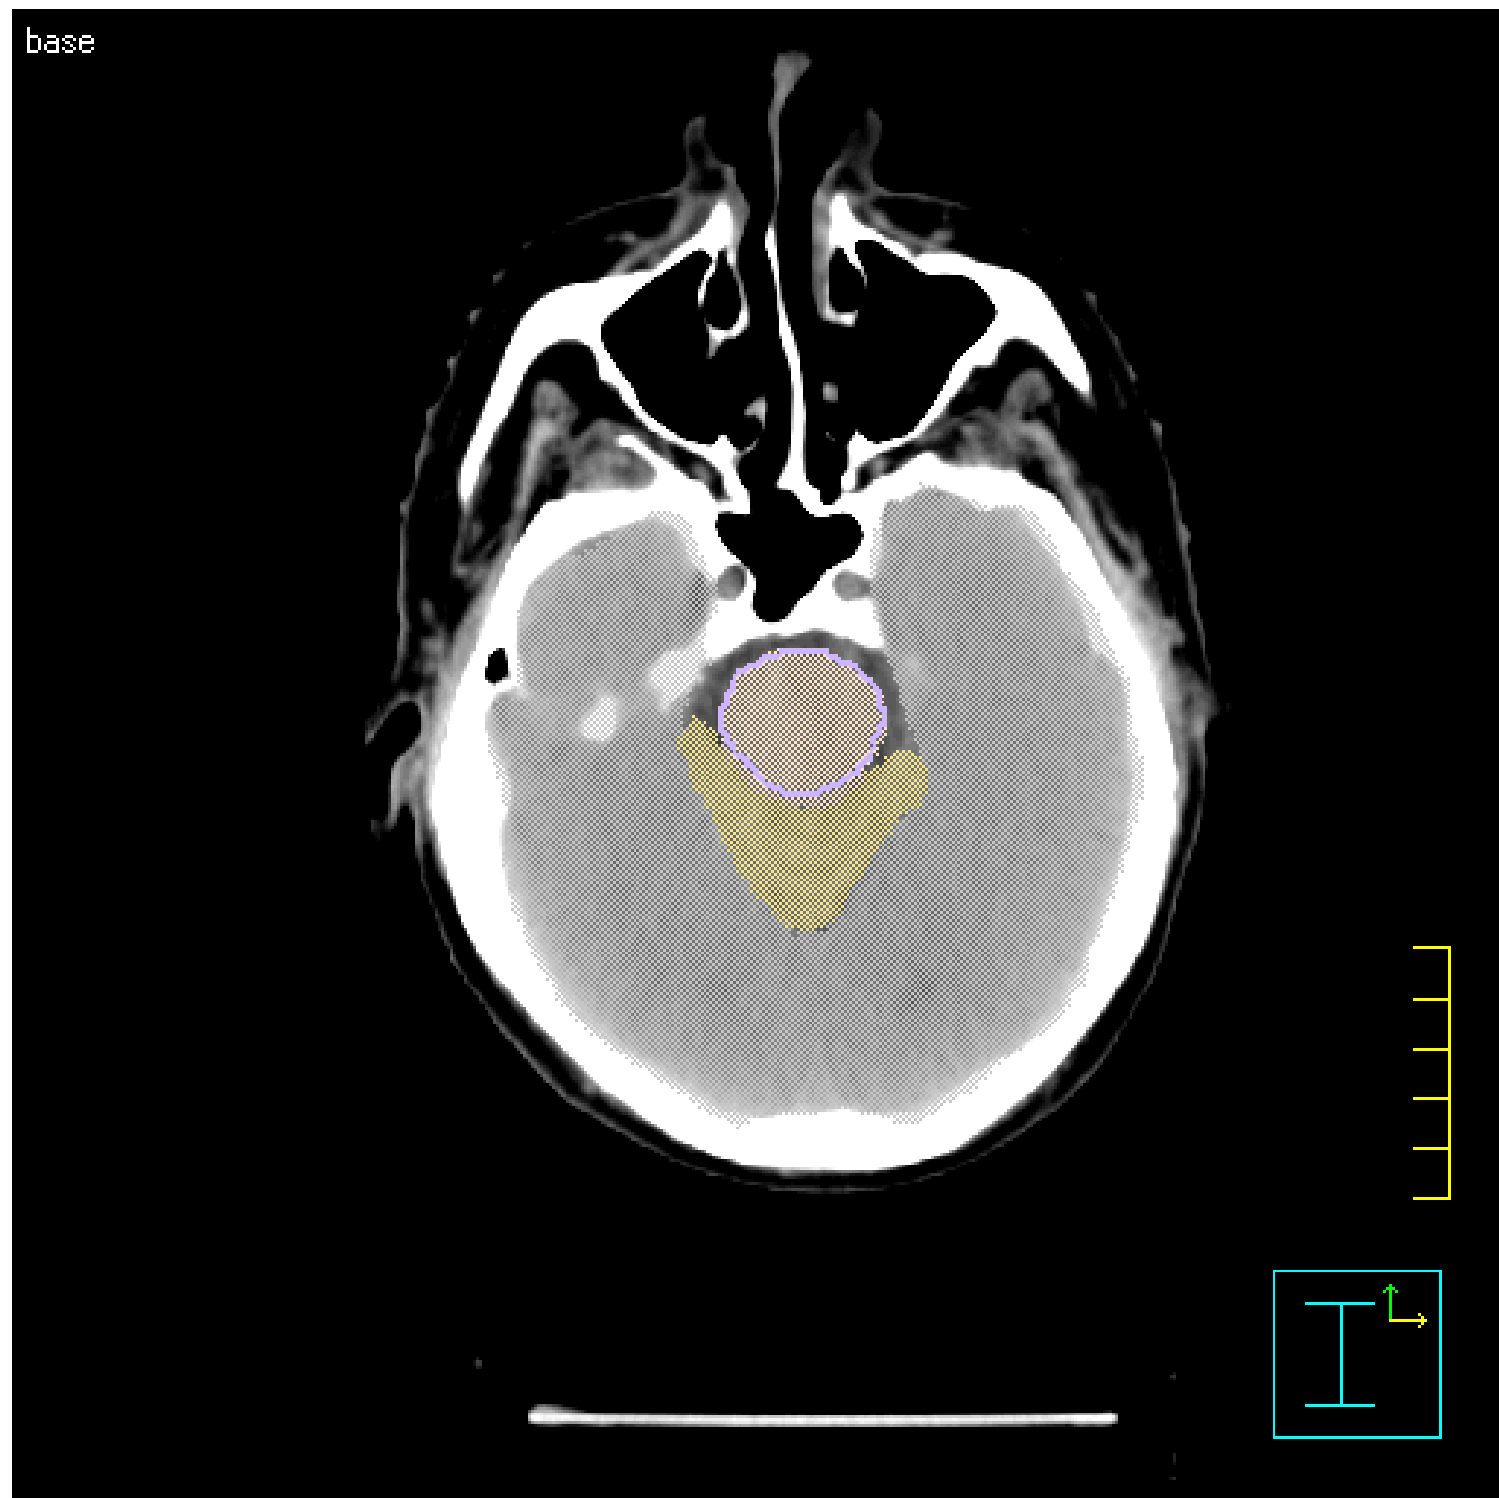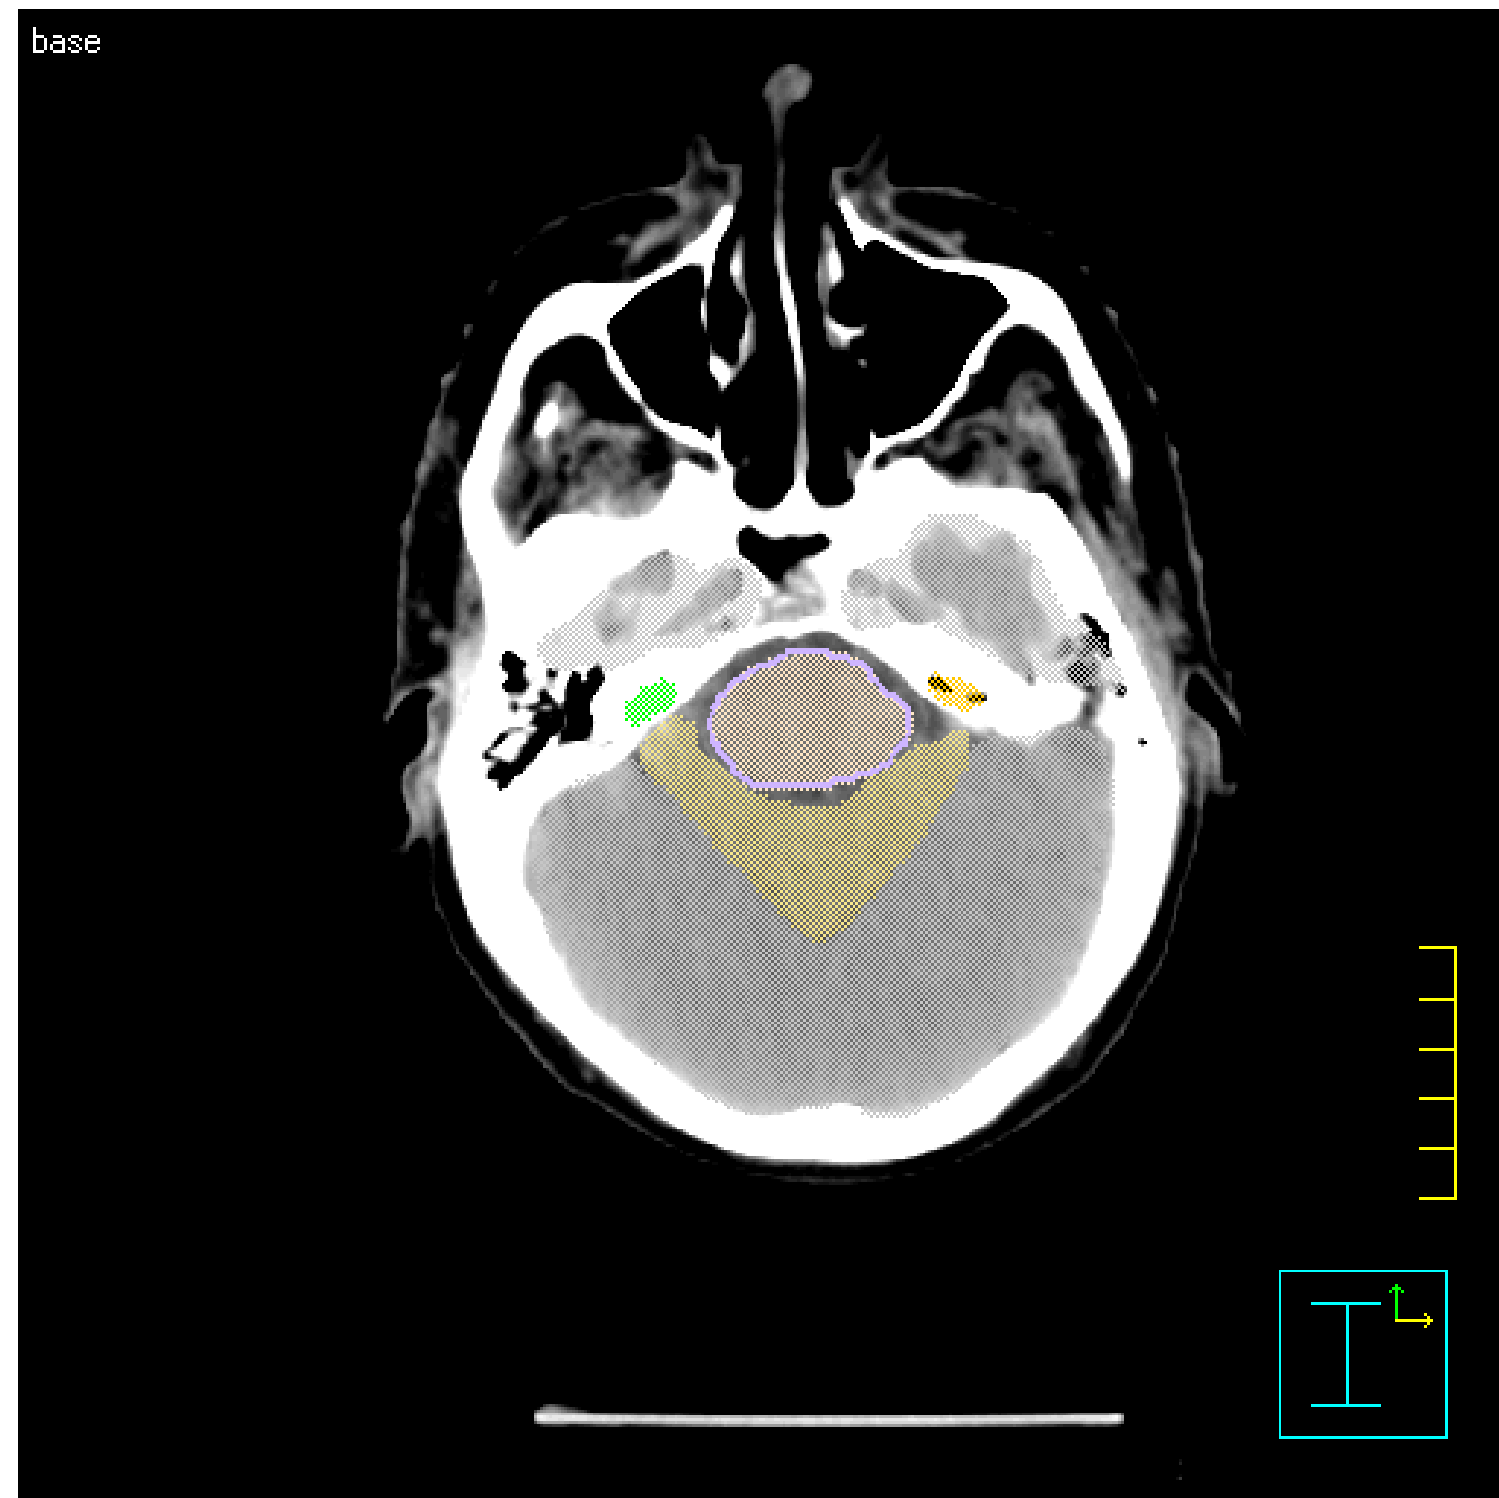

Patient Name: Protocol ID: , Patient ID:

Date / Time: Mon Oct 7 13:47:43 2013

Revision:

MRN:

Comment:

Planner:

Plan Name:

Physician / Physicist:

Institution:

Trial Name:

Pinnacle ID:

Links: [planDB](#)

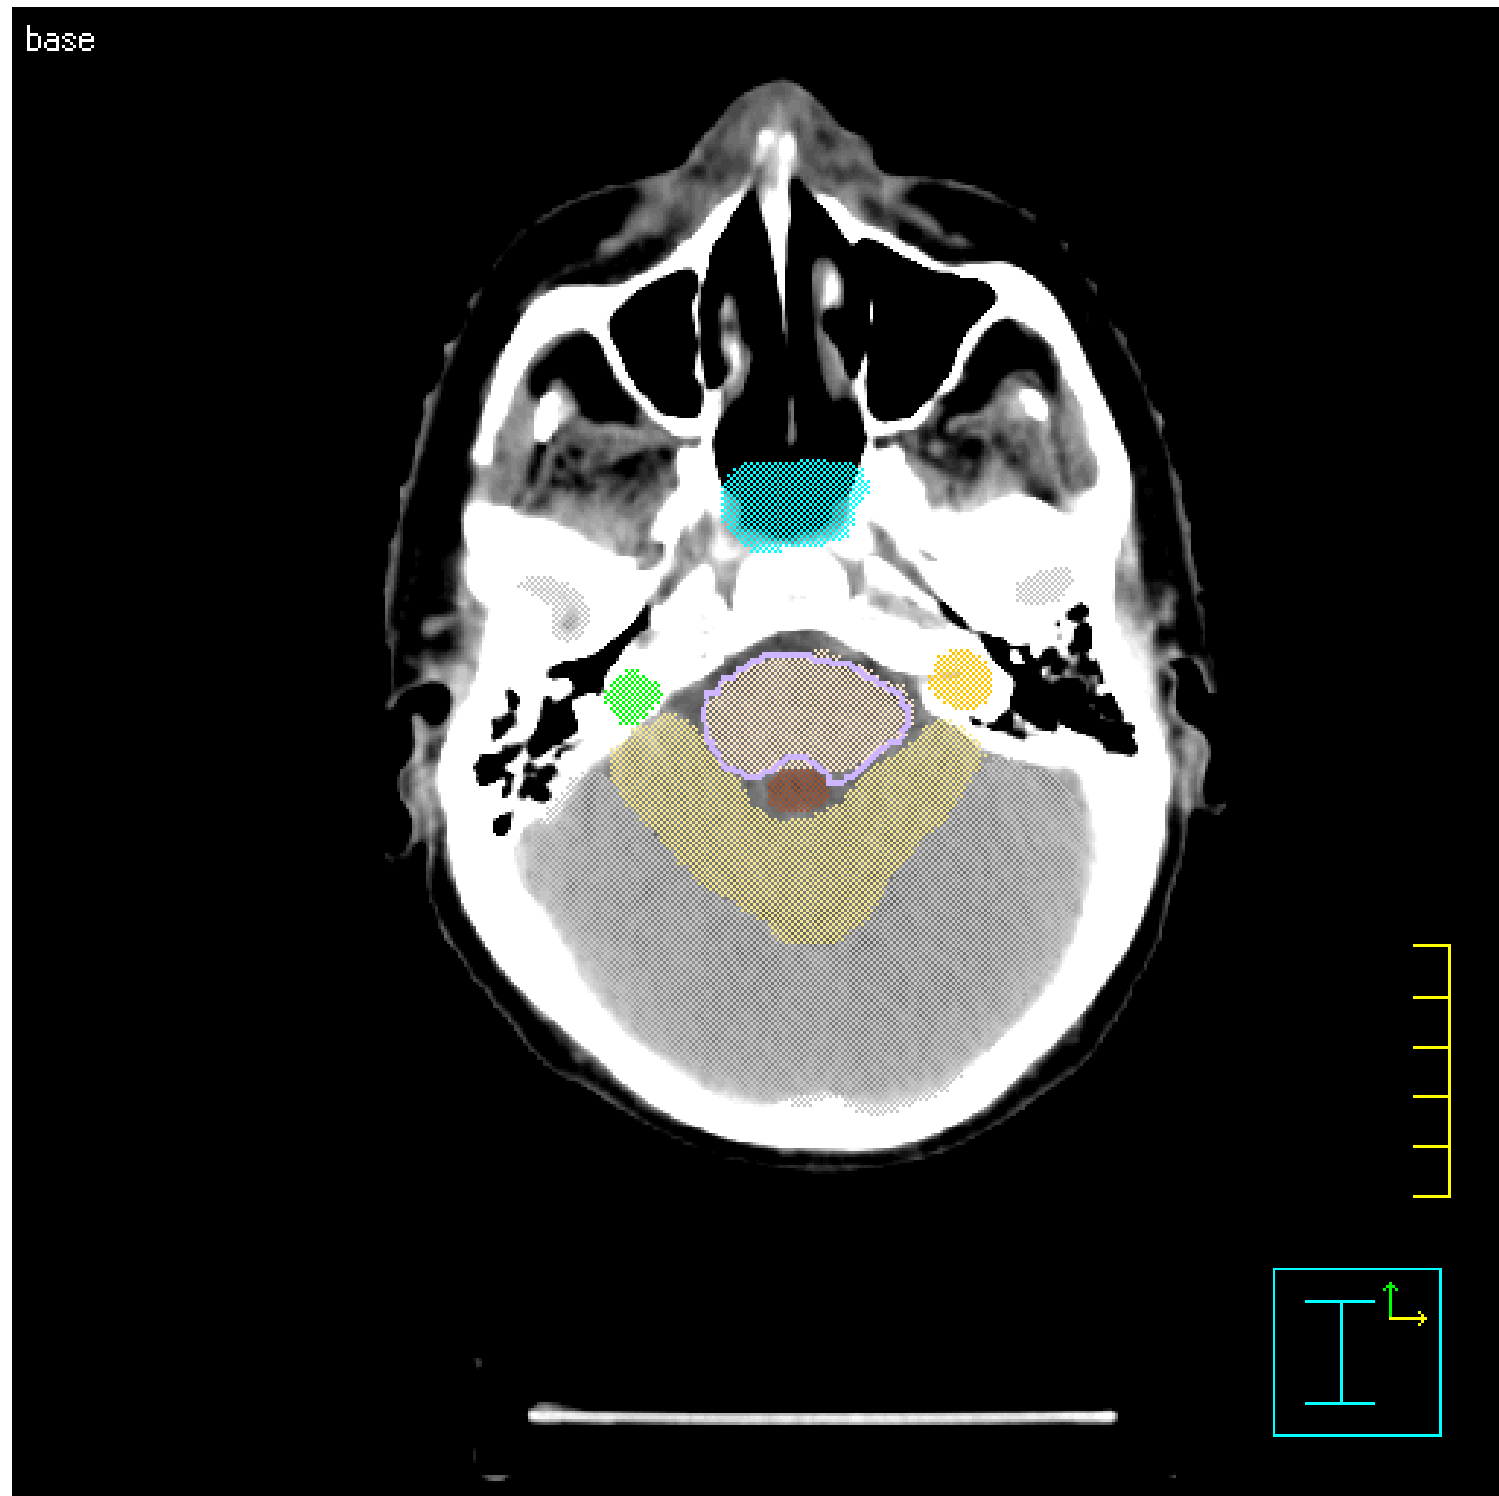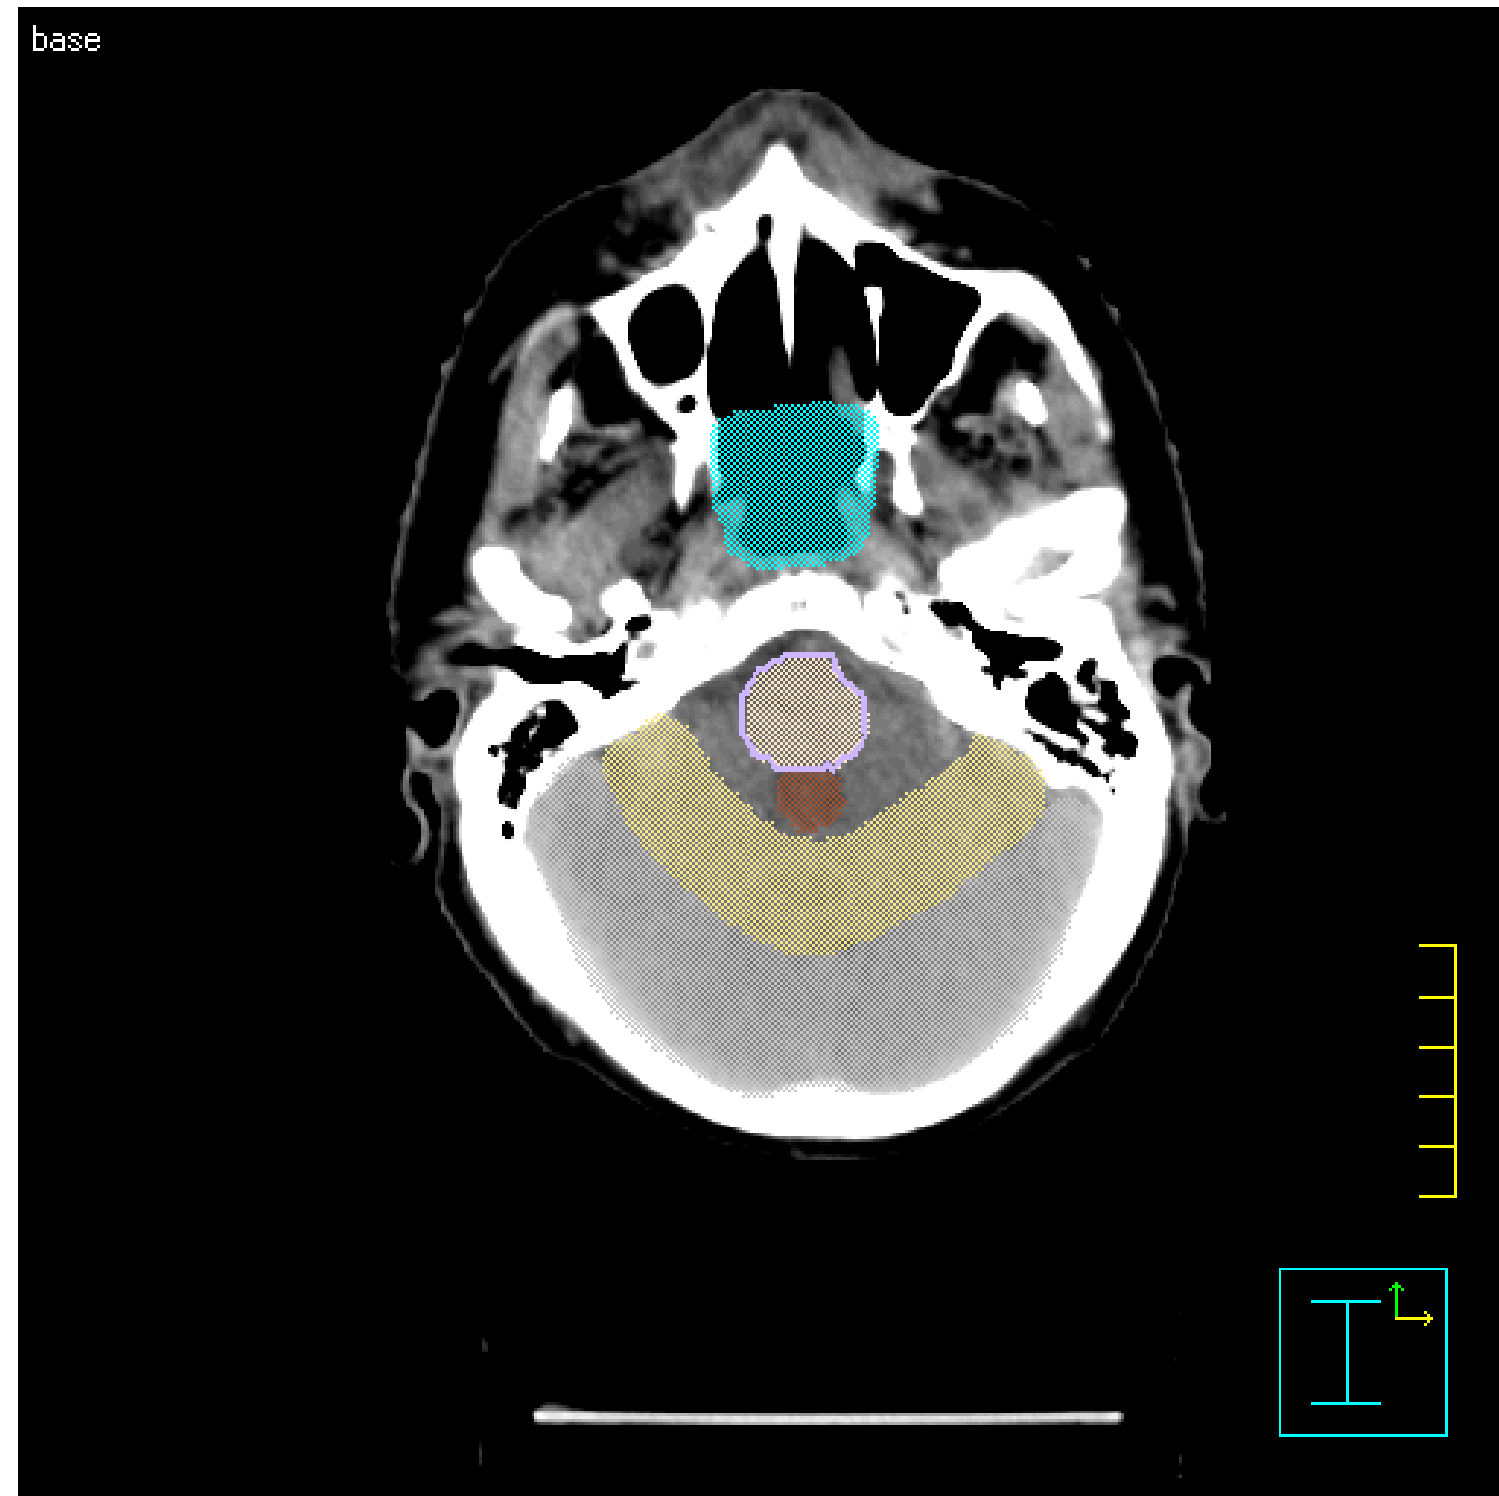

Patient Name: Protocol ID: , Patient ID:

Date / Time: Mon Oct 7 13:47:43 2013

Revision:

MRN:

Comment:

Planner:

Plan Name:

Physician / Physicist:

Institution:

Trial Name:

Pinnacle ID:

Links: [planDB](#)

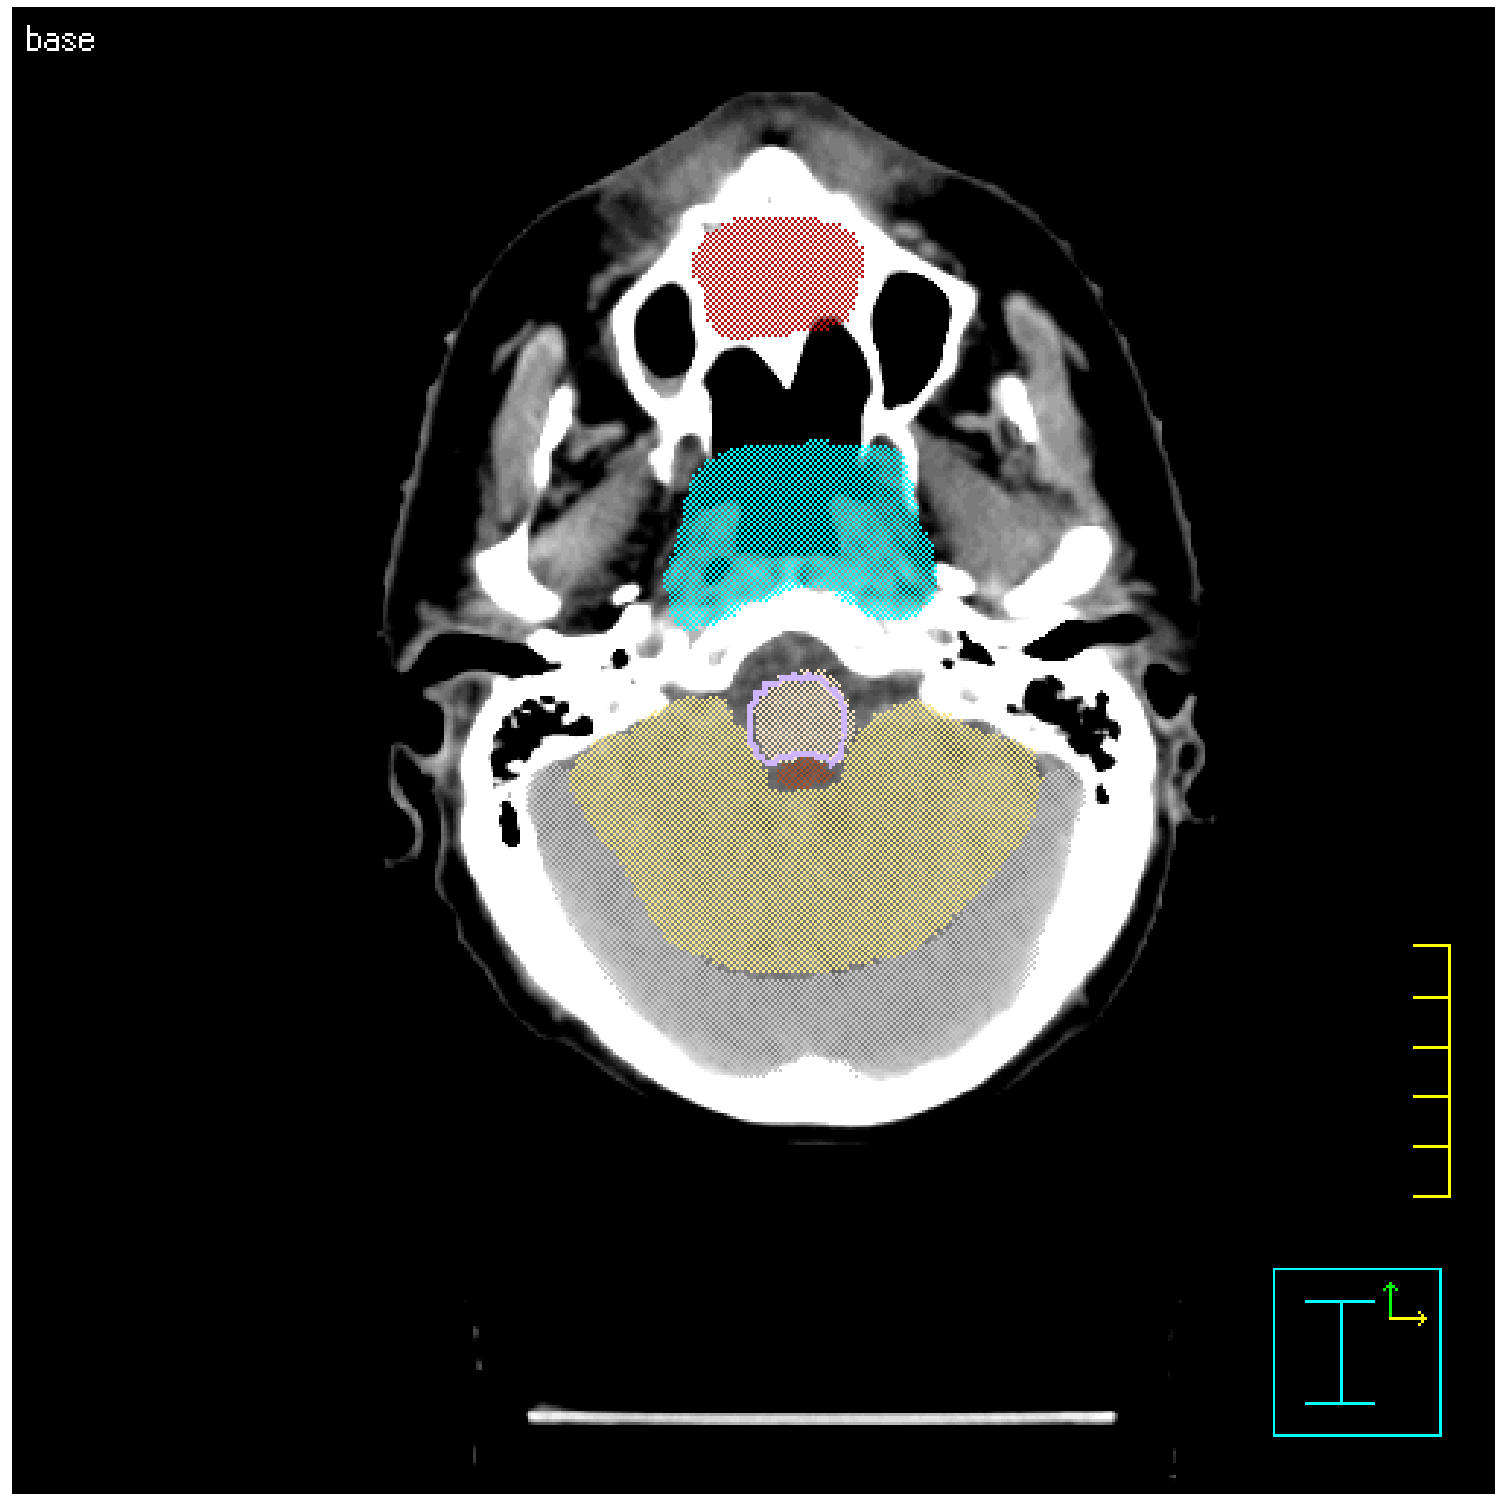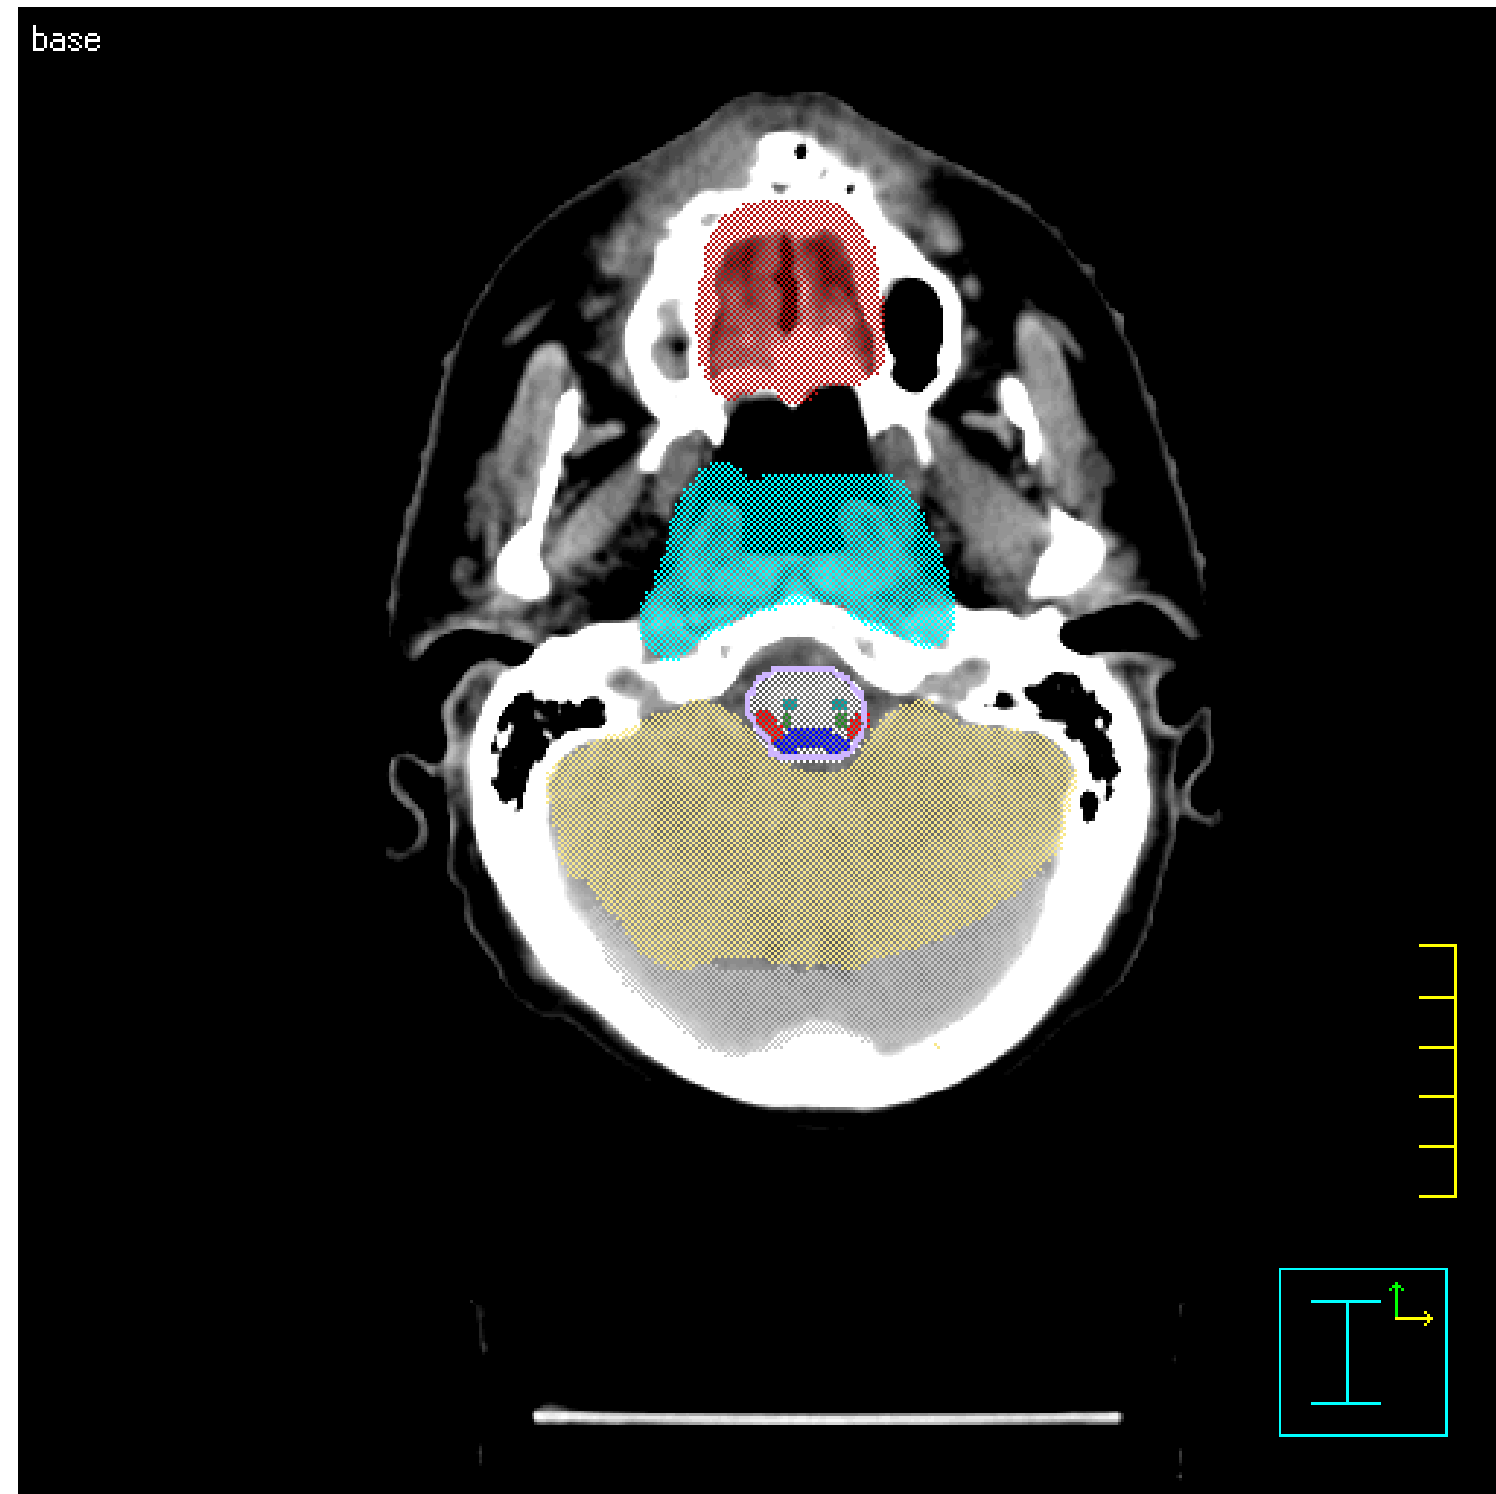

Patient Name: Protocol ID: , Patient ID:

Date / Time: Mon Oct 7 13:47:43 2013

Revision:

MRN:

Comment:

Planner:

Plan Name:

Physician / Physicist:

Institution:

Trial Name:

Pinnacle ID:

Links: [planDB](#)

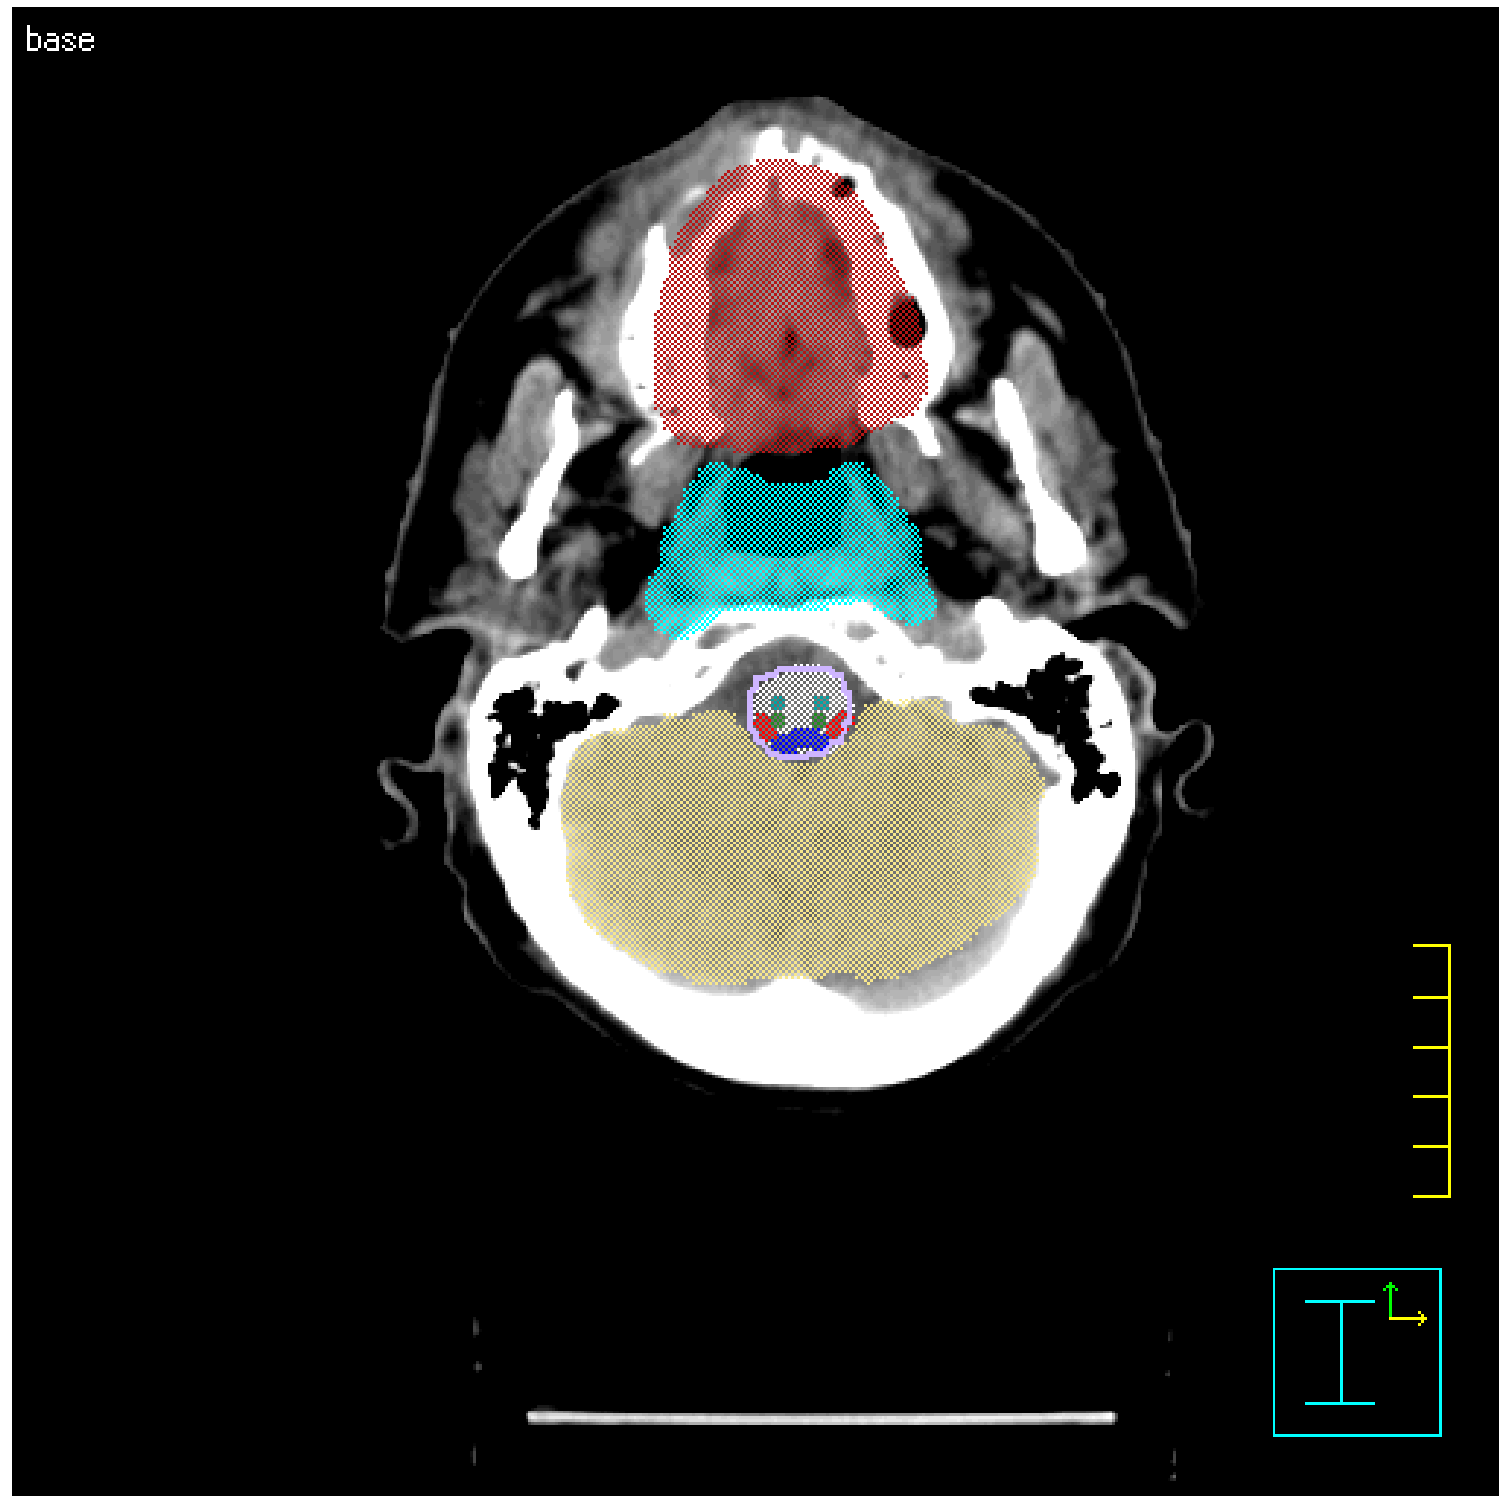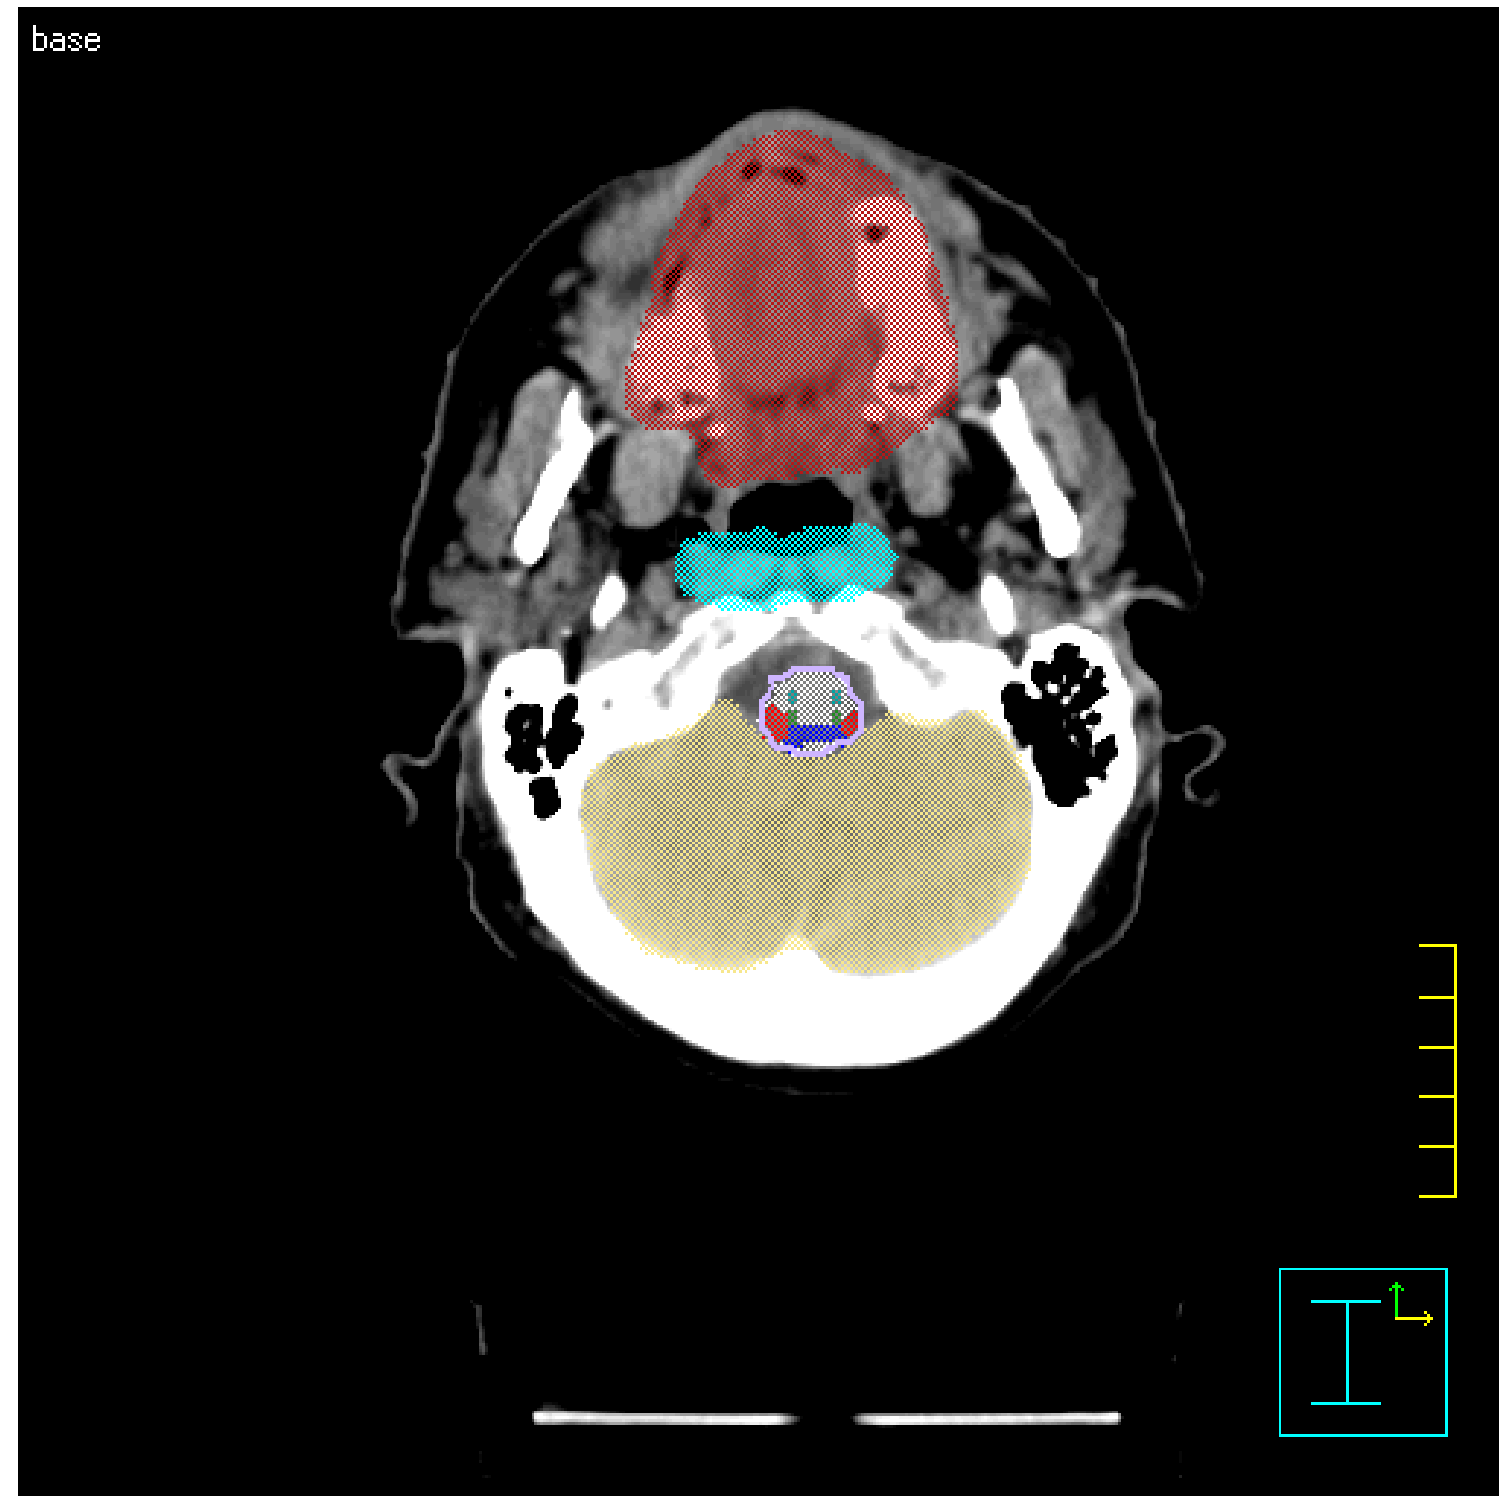

Patient Name: Protocol ID: , Patient ID:

Date / Time: Mon Oct 7 13:47:43 2013

Revision:

MRN:

Comment:

Planner:

Plan Name:

Physician / Physicist:

Institution:

Trial Name:

Pinnacle ID:

Links: [planDB](#)

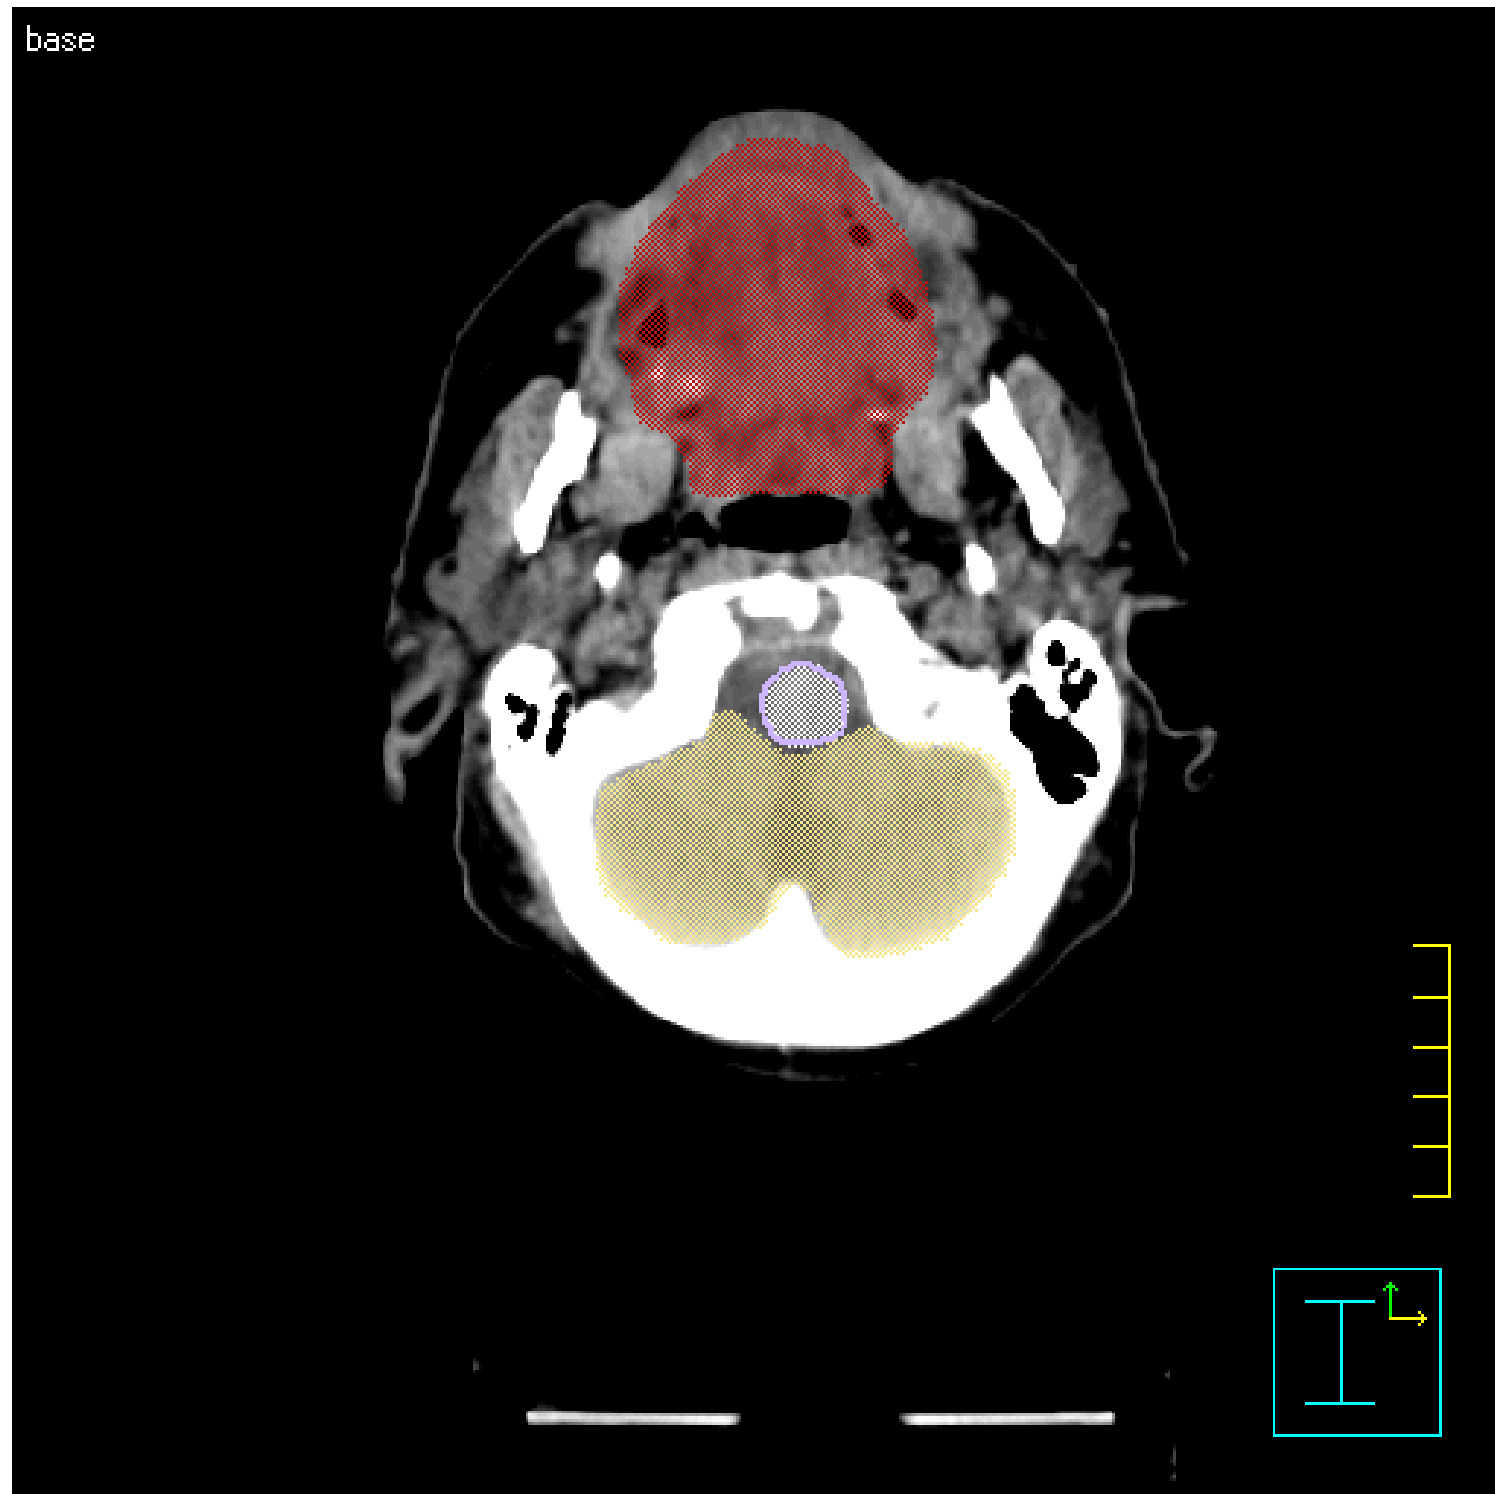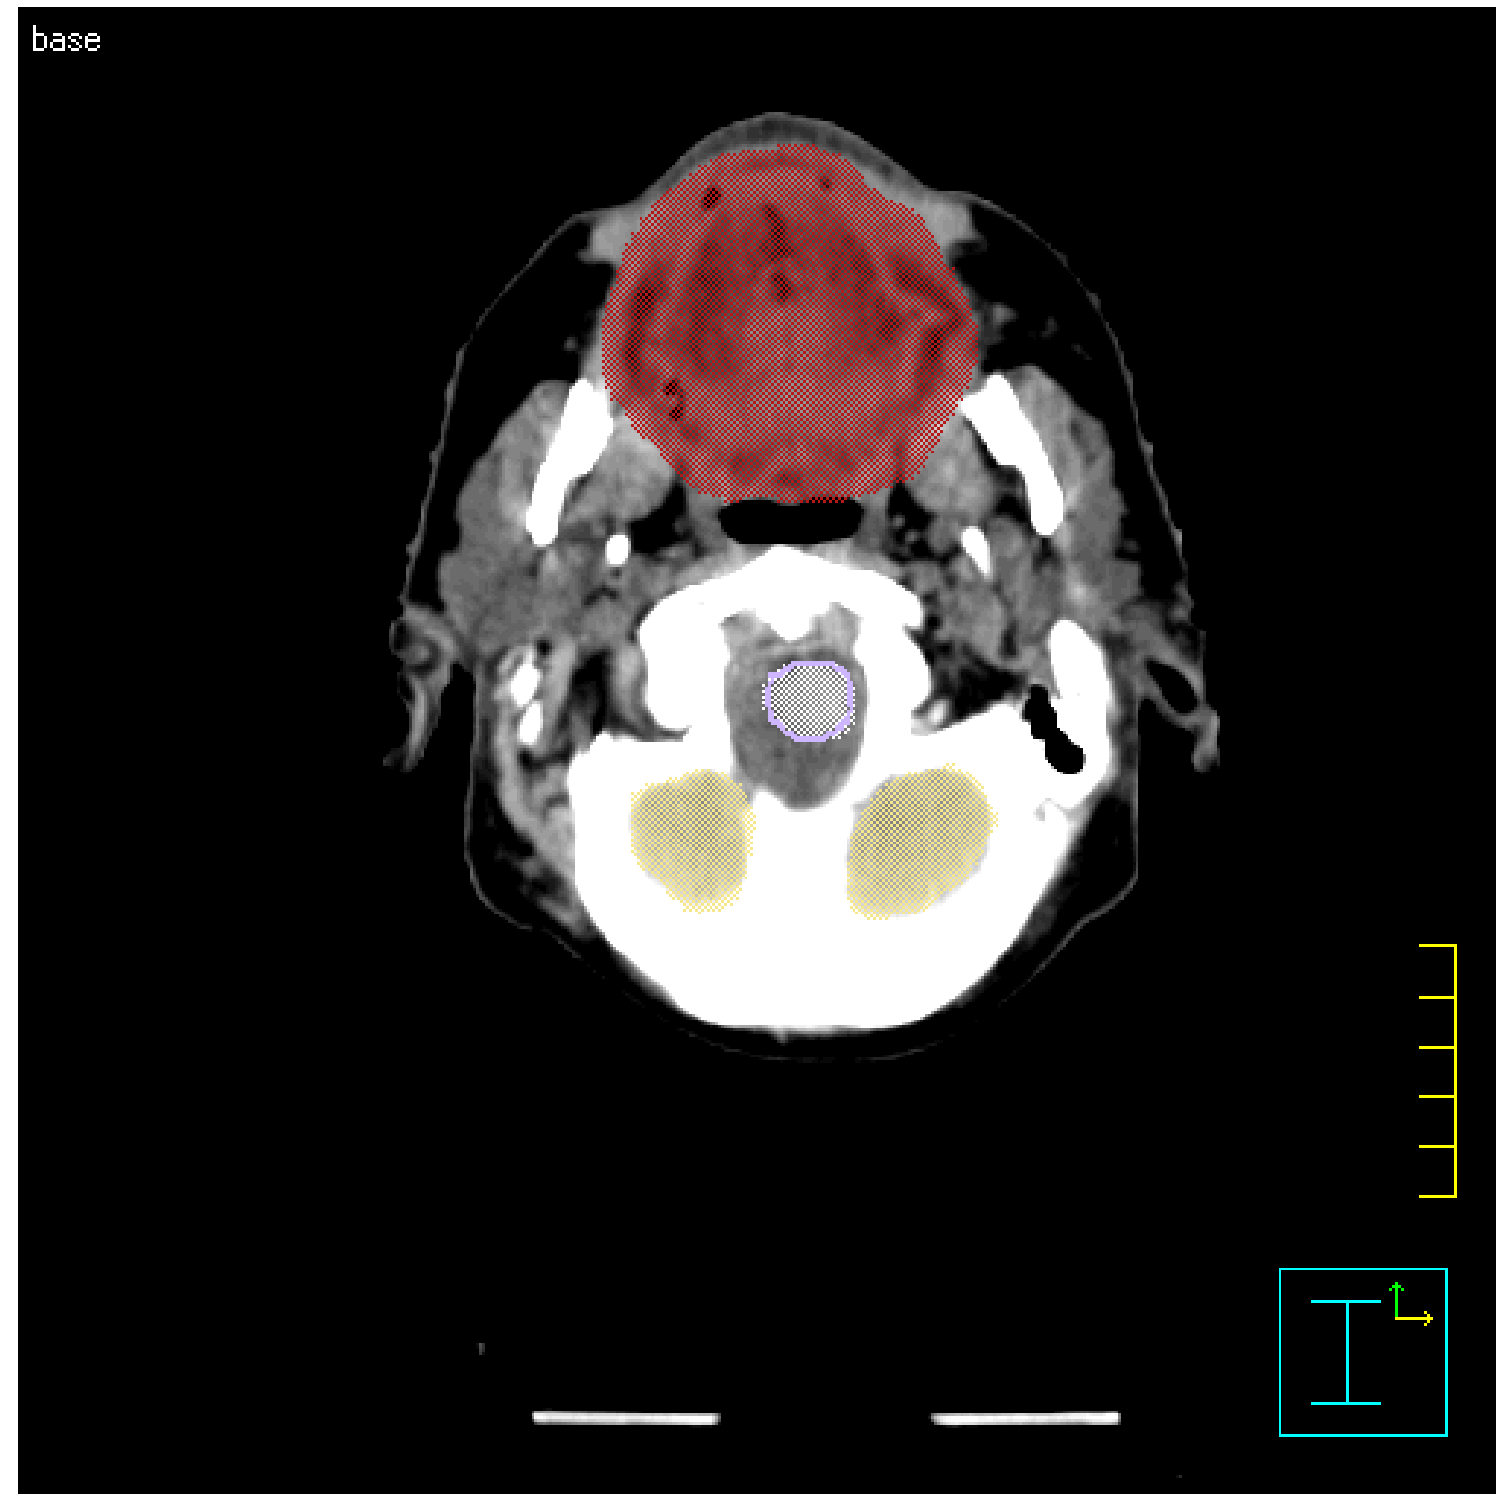



Patient Name: Protocol ID: , Patient ID:

Date / Time: Mon Oct 7 13:47:43 2013

Revision:

MRN:

Comment:

Planner:

Plan Name:

Physician / Physicist:

Institution:

Trial Name:

Pinnacle ID:

Links: [planDB](#)

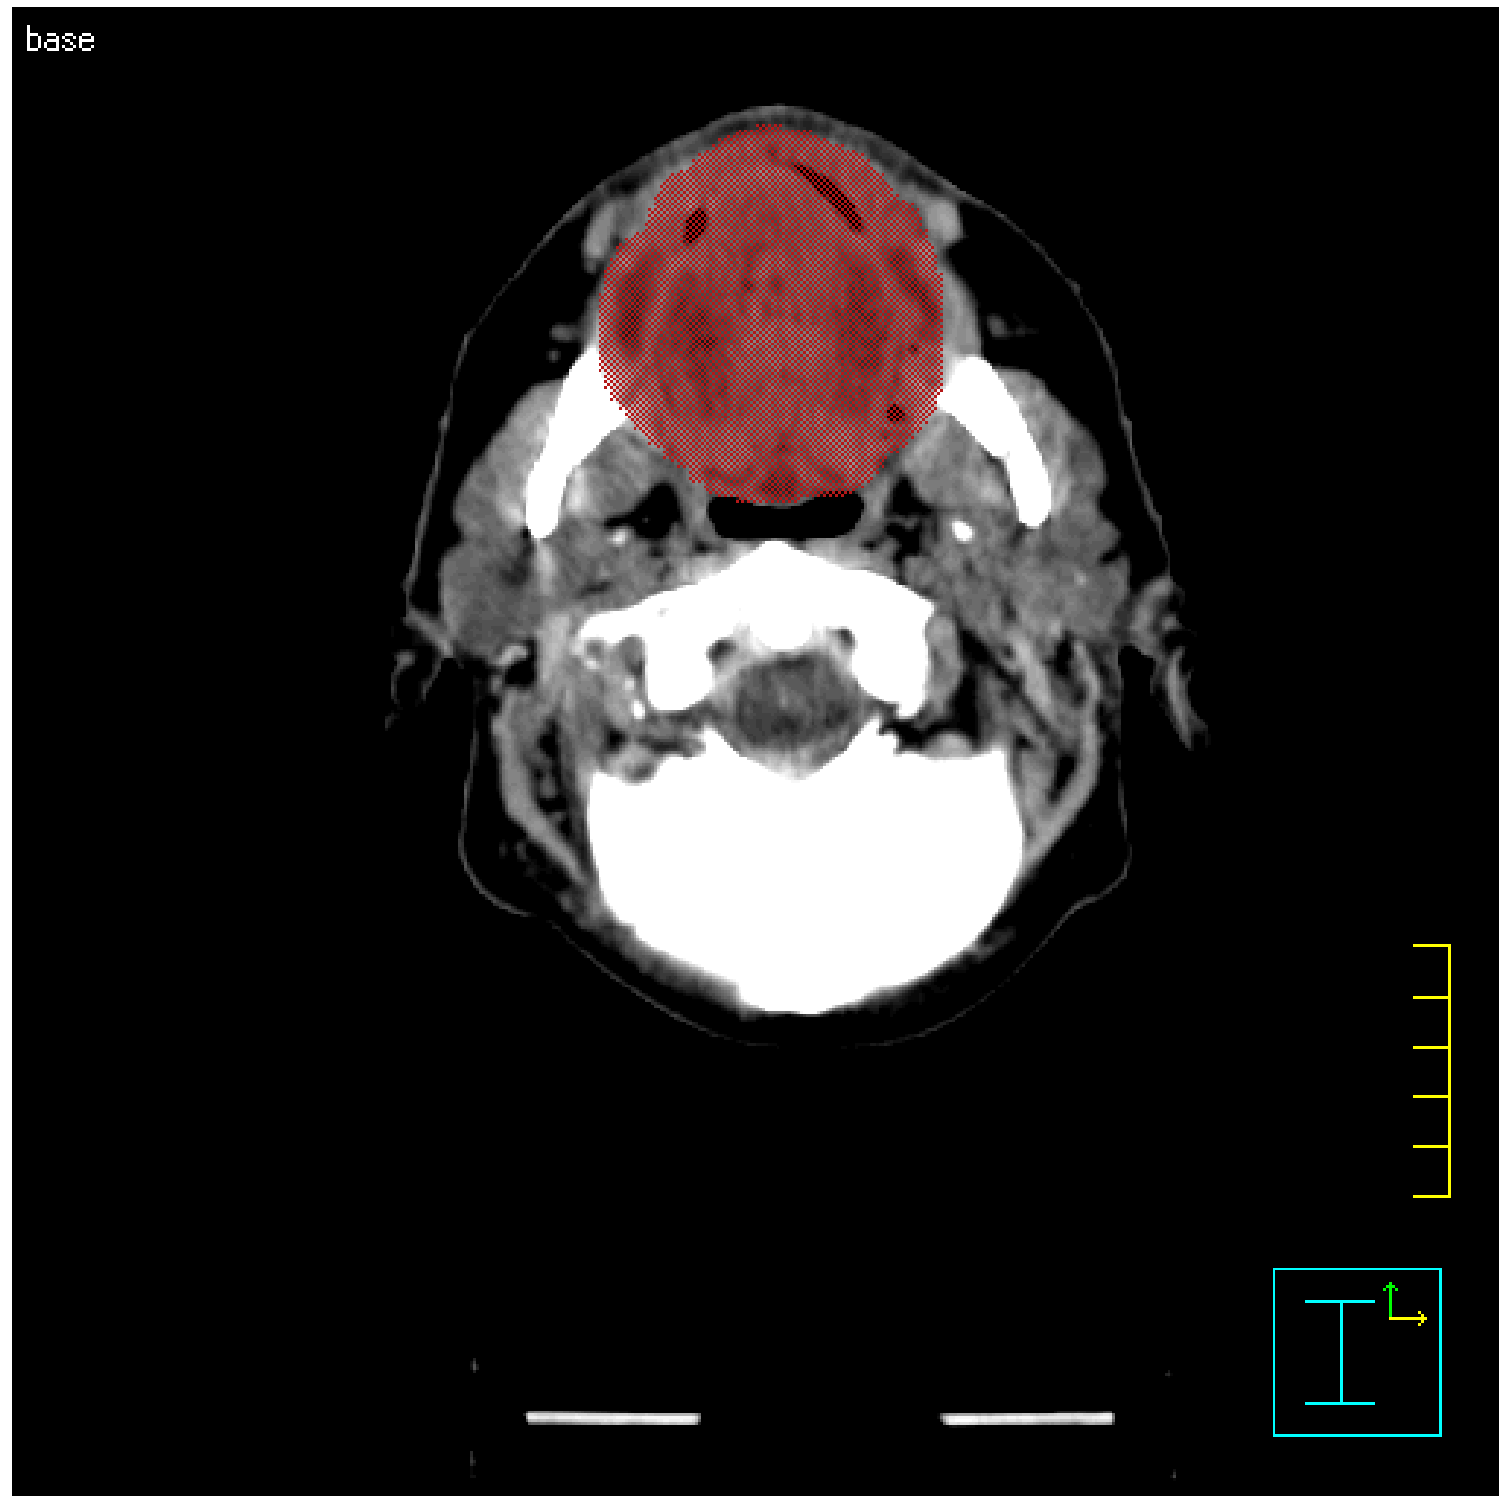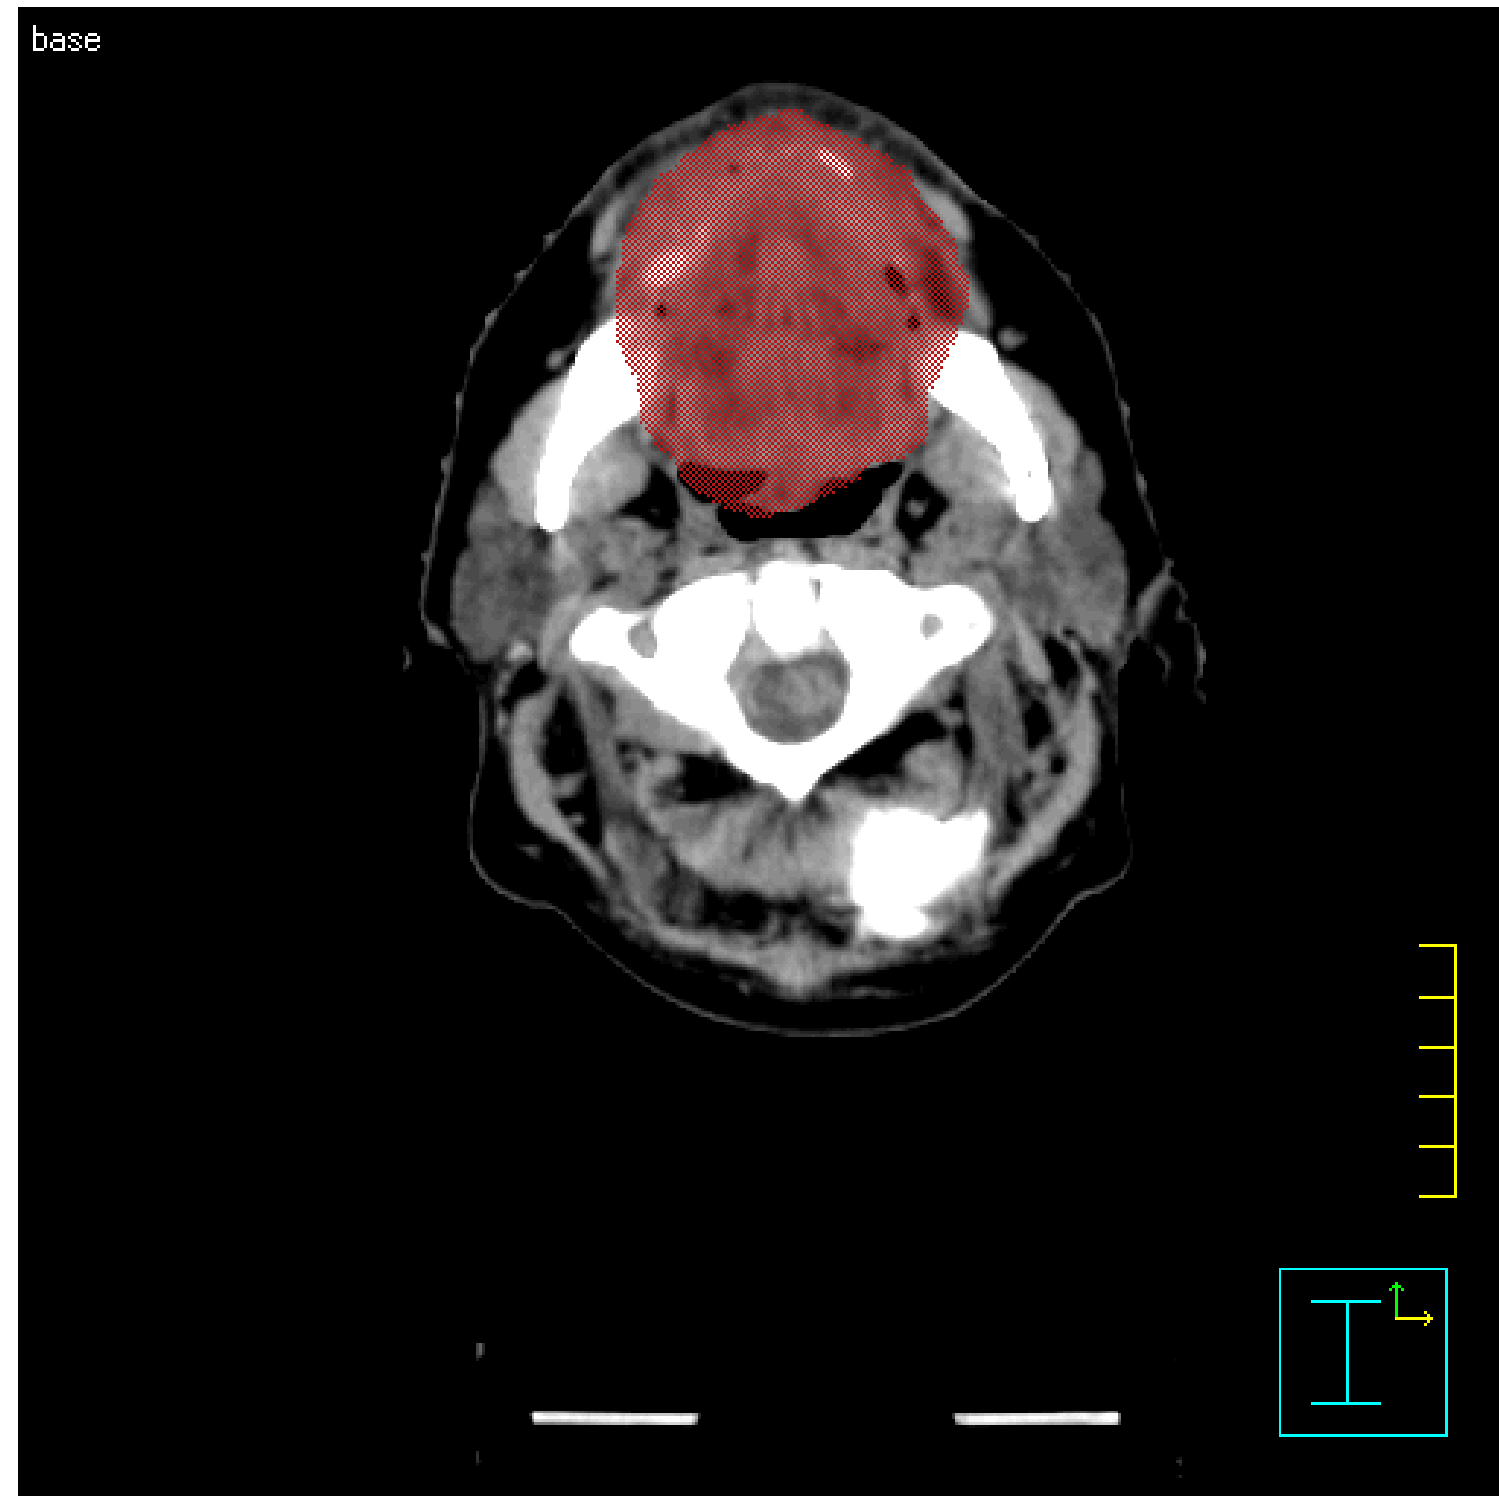

Patient Name: Protocol ID: , Patient ID:

Date / Time: Mon Oct 7 13:47:43 2013

Revision:

MRN:

Comment:

Planner:

Plan Name:

Physician / Physicist:

Institution:

Trial Name:

Pinnacle ID:

Links: [planDB](#)

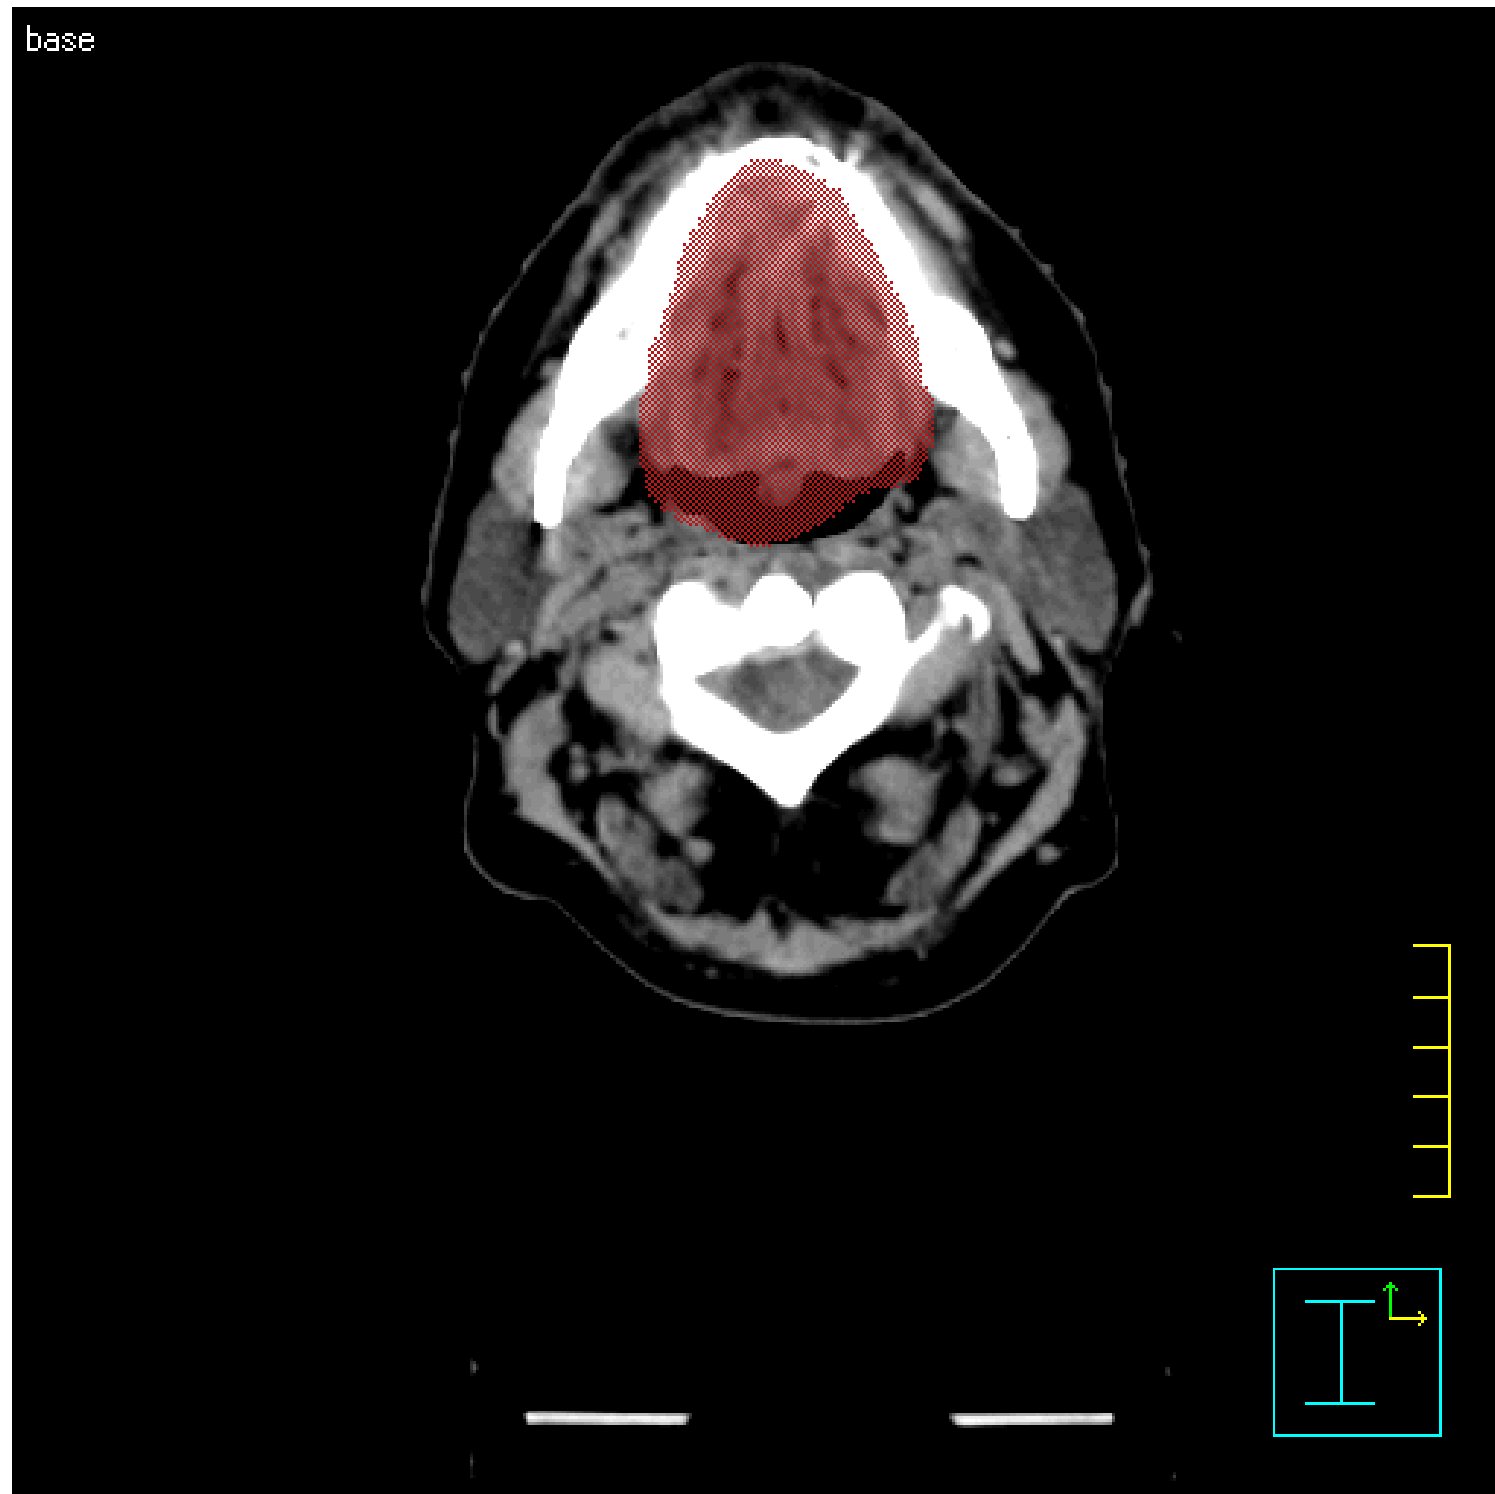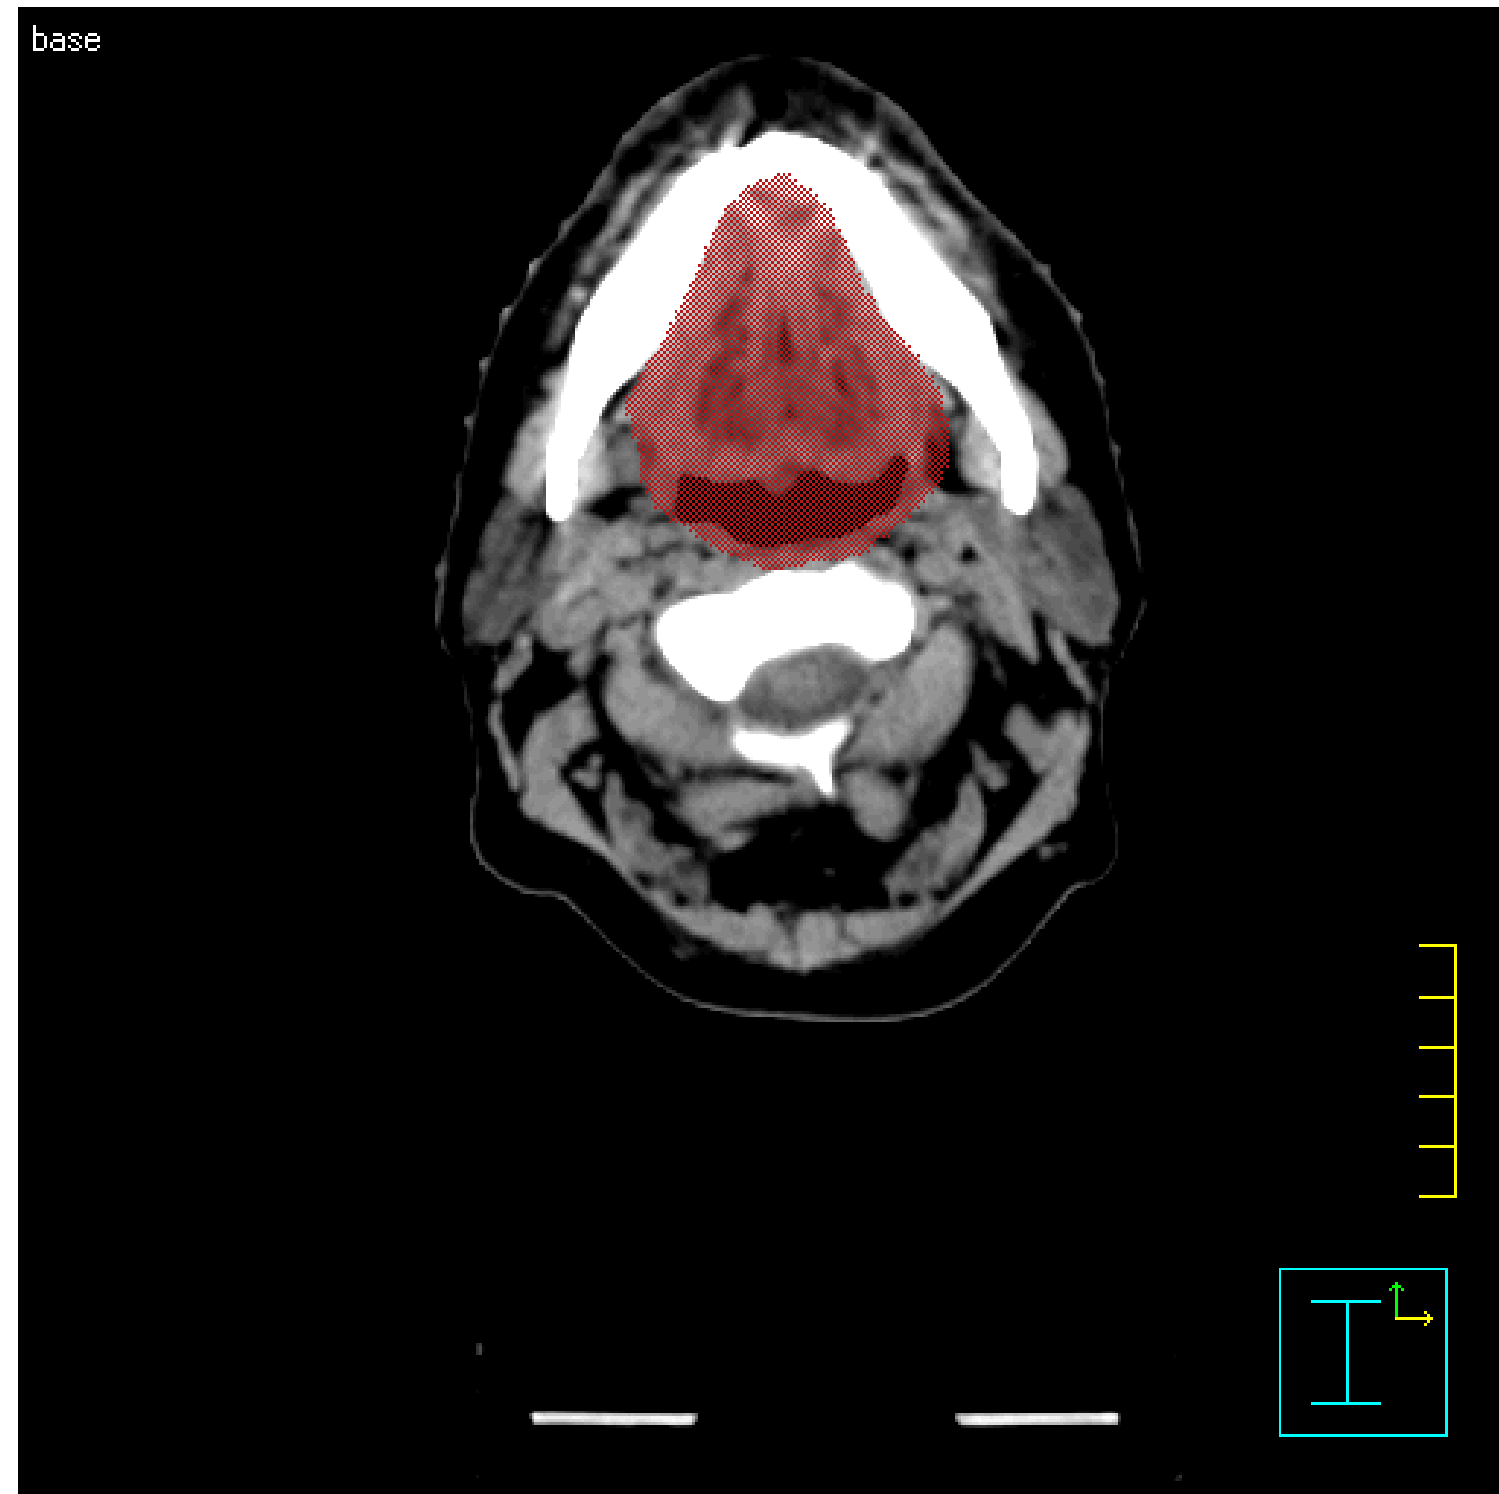

Patient Name: Protocol ID: , Patient ID:

Date / Time: Mon Oct 7 13:47:43 2013

Revision:

MRN:

Comment:

Planner:

Plan Name:

Physician / Physicist:

Institution:

Trial Name:

Pinnacle ID:

Links: [planDB](#)

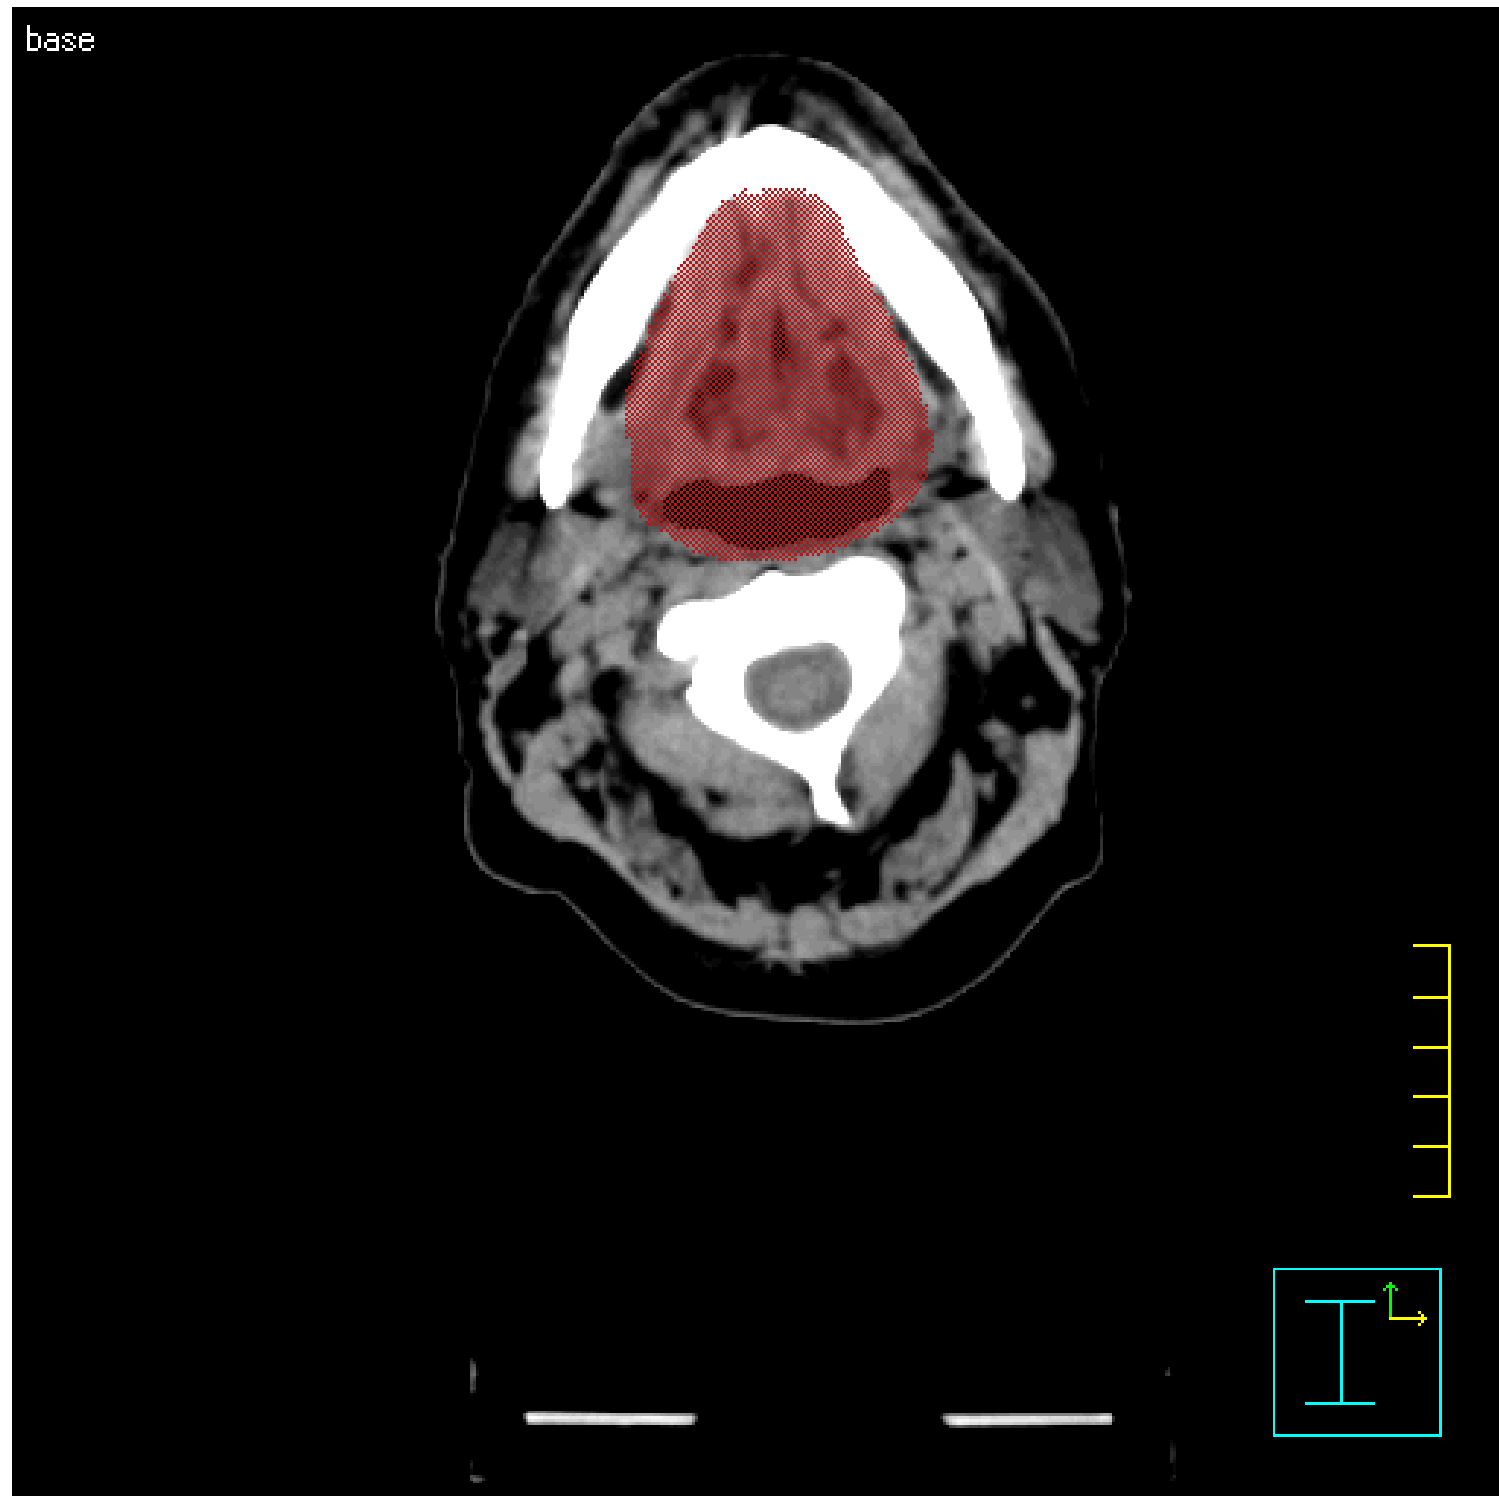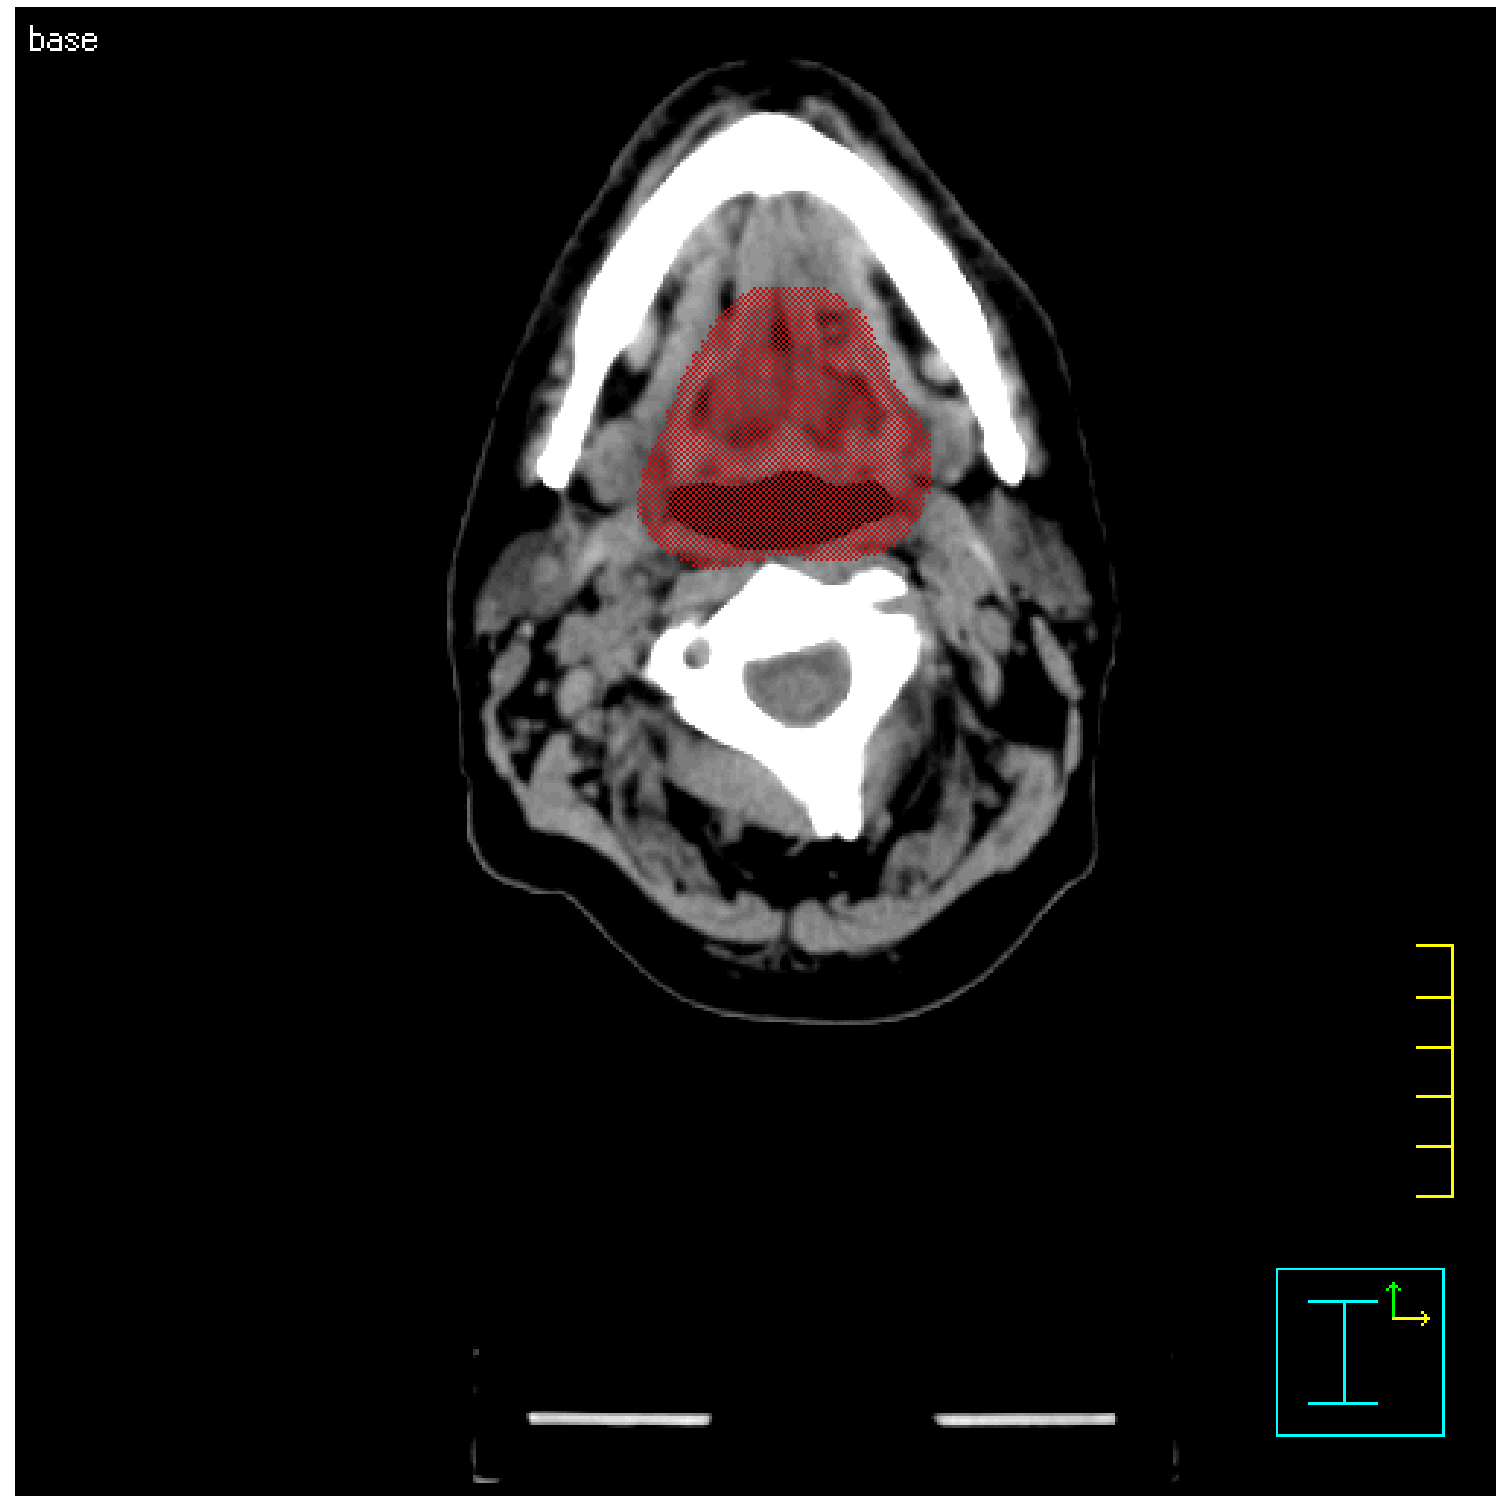

Patient Name: Protocol ID: , Patient ID:

Date / Time: Mon Oct 7 13:47:43 2013

Revision:

MRN:

Comment:

Planner:

Plan Name:

Physician / Physicist:

Institution:

Trial Name:

Pinnacle ID:

Links: [planDB](#)

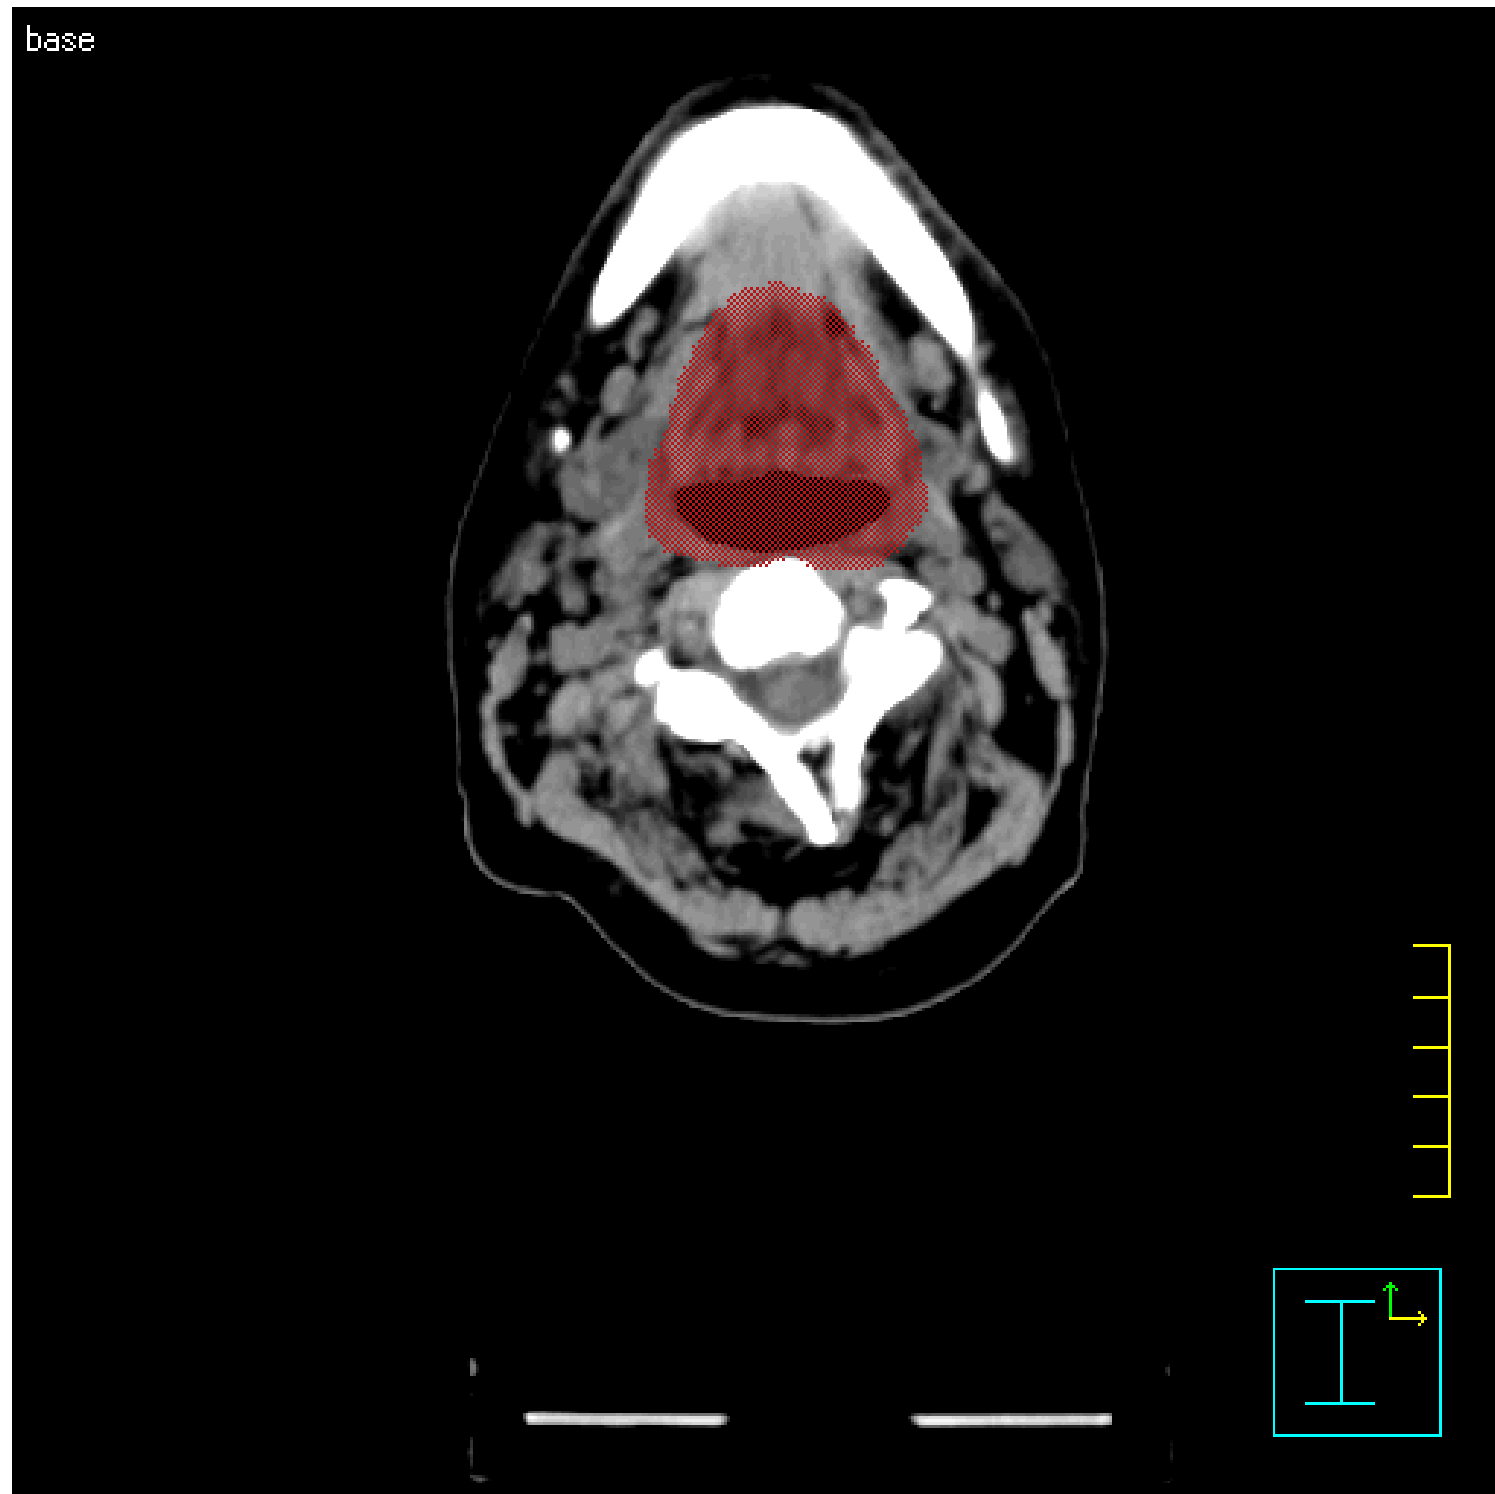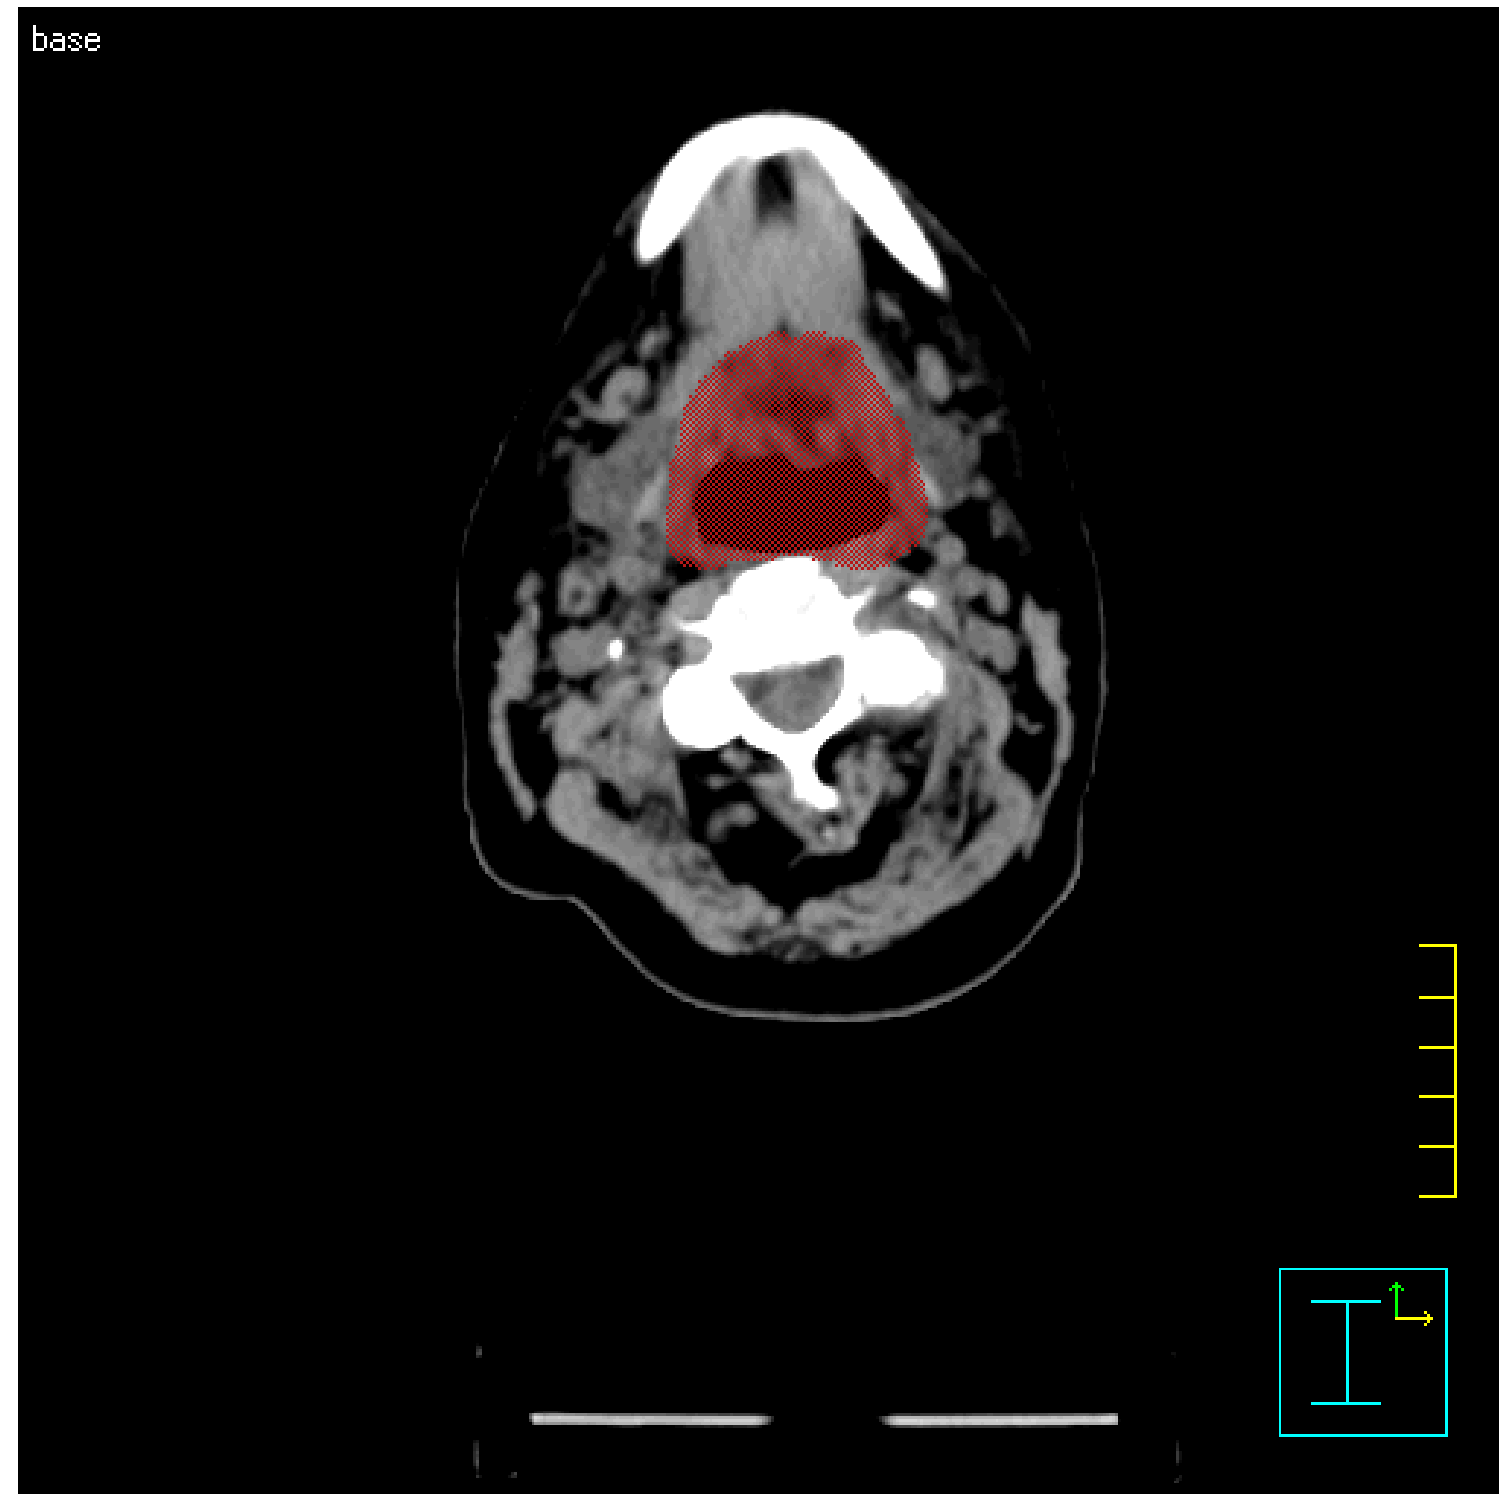

Patient Name: Protocol ID: , Patient ID:

Date / Time: Mon Oct 7 13:47:43 2013

Revision:

MRN:

Comment:

Planner:

Plan Name:

Physician / Physicist:

Institution:

Trial Name:

Pinnacle ID:

Links: [planDB](#)

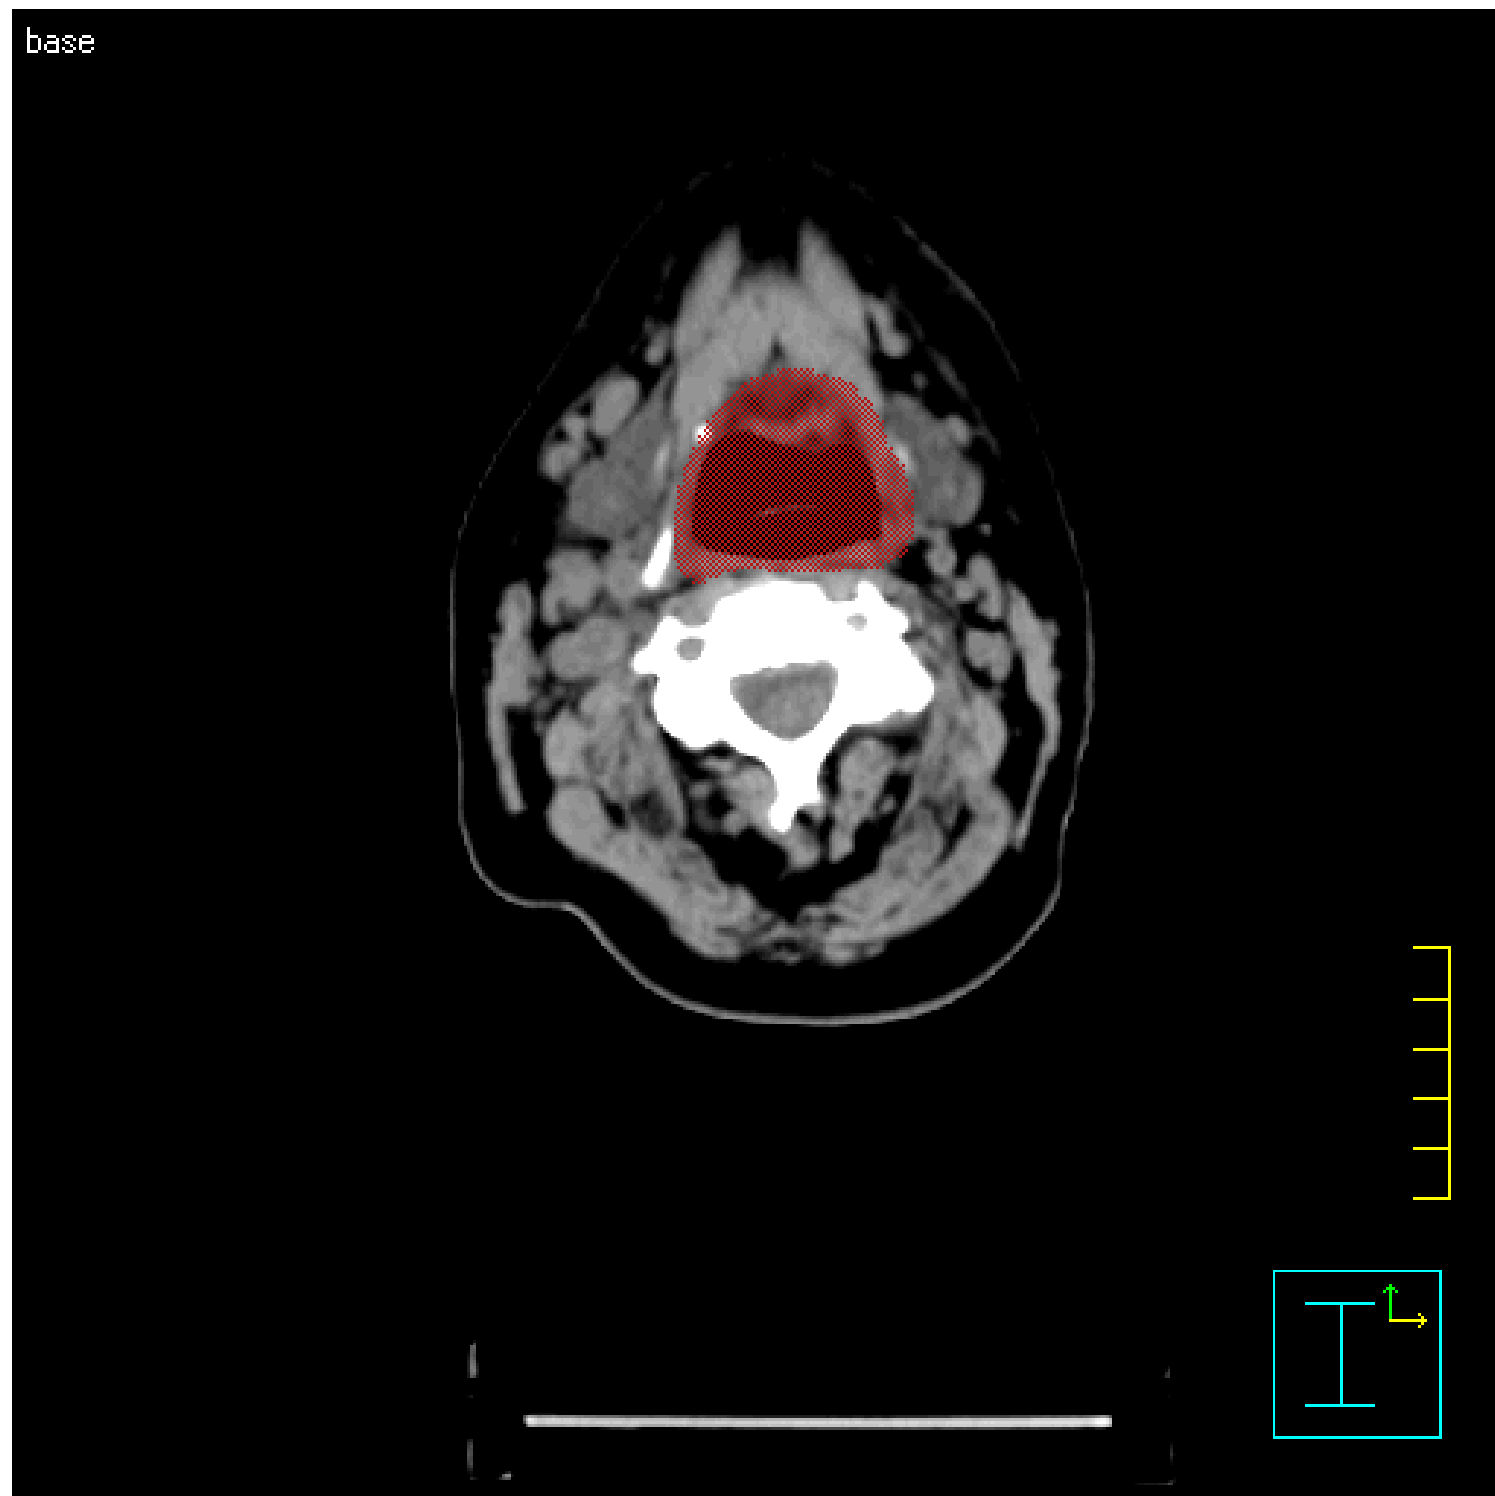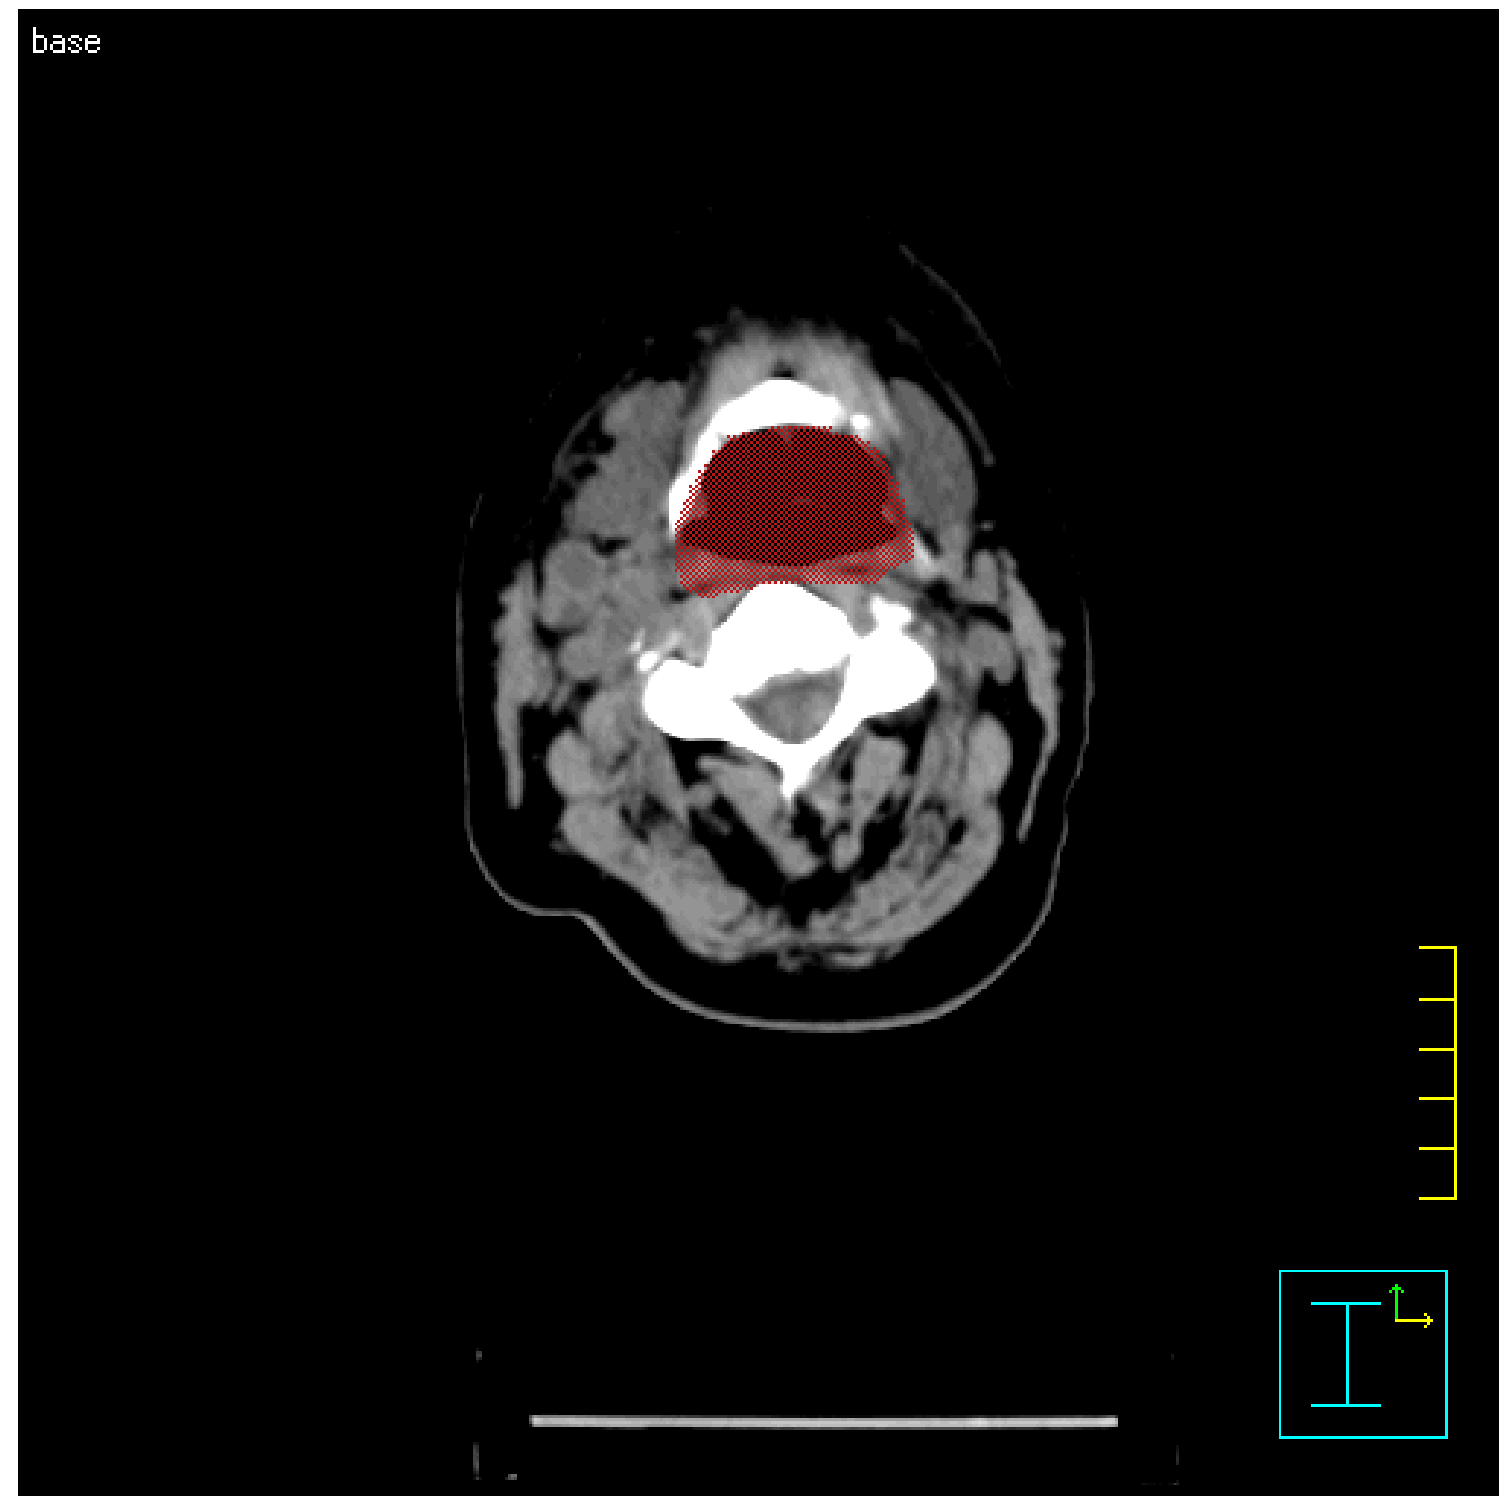

Patient Name: Protocol ID: , Patient ID:

Date / Time: Mon Oct 7 13:47:43 2013

Revision:

MRN:

Comment:

Planner:

Plan Name:

Physician / Physicist:

Institution:

Trial Name:

Pinnacle ID:

Links: [planDB](#)

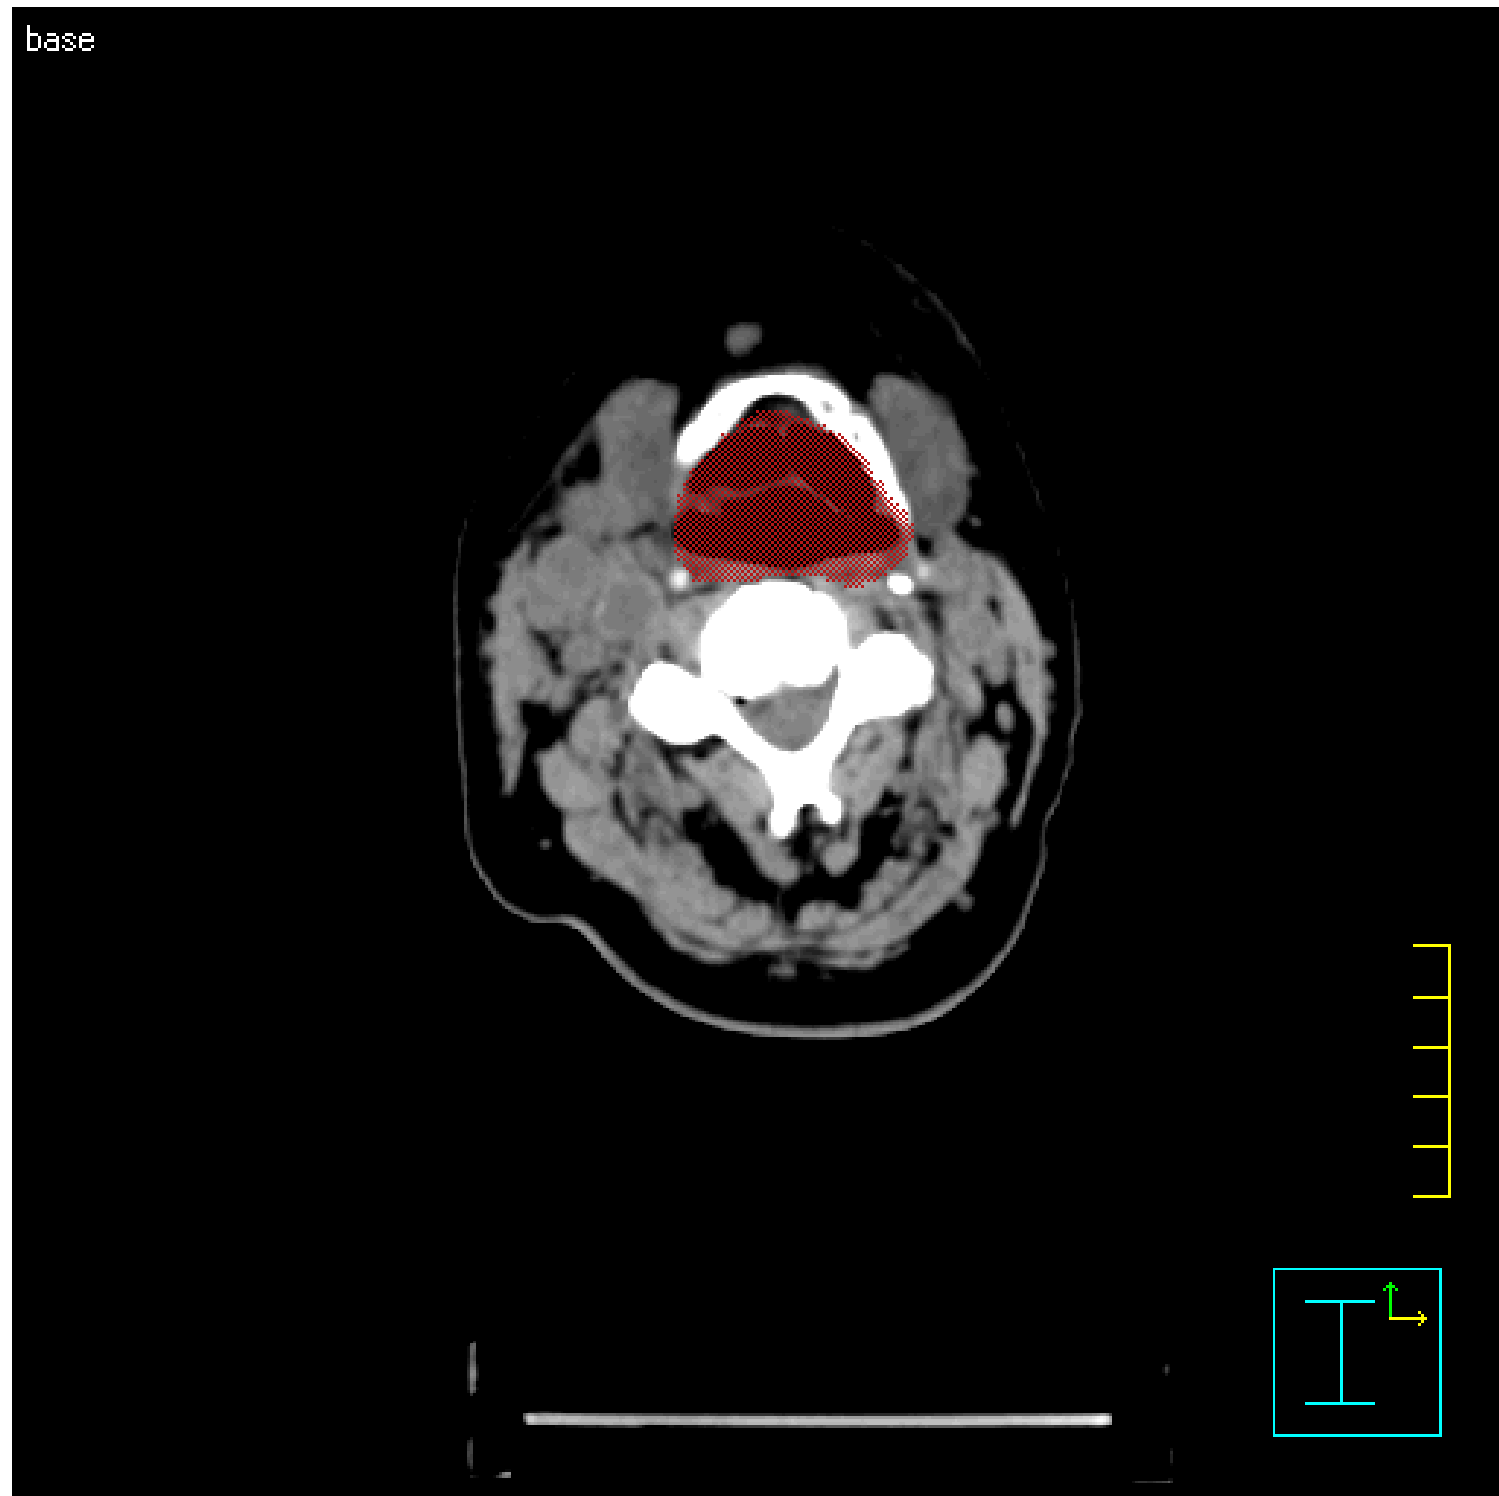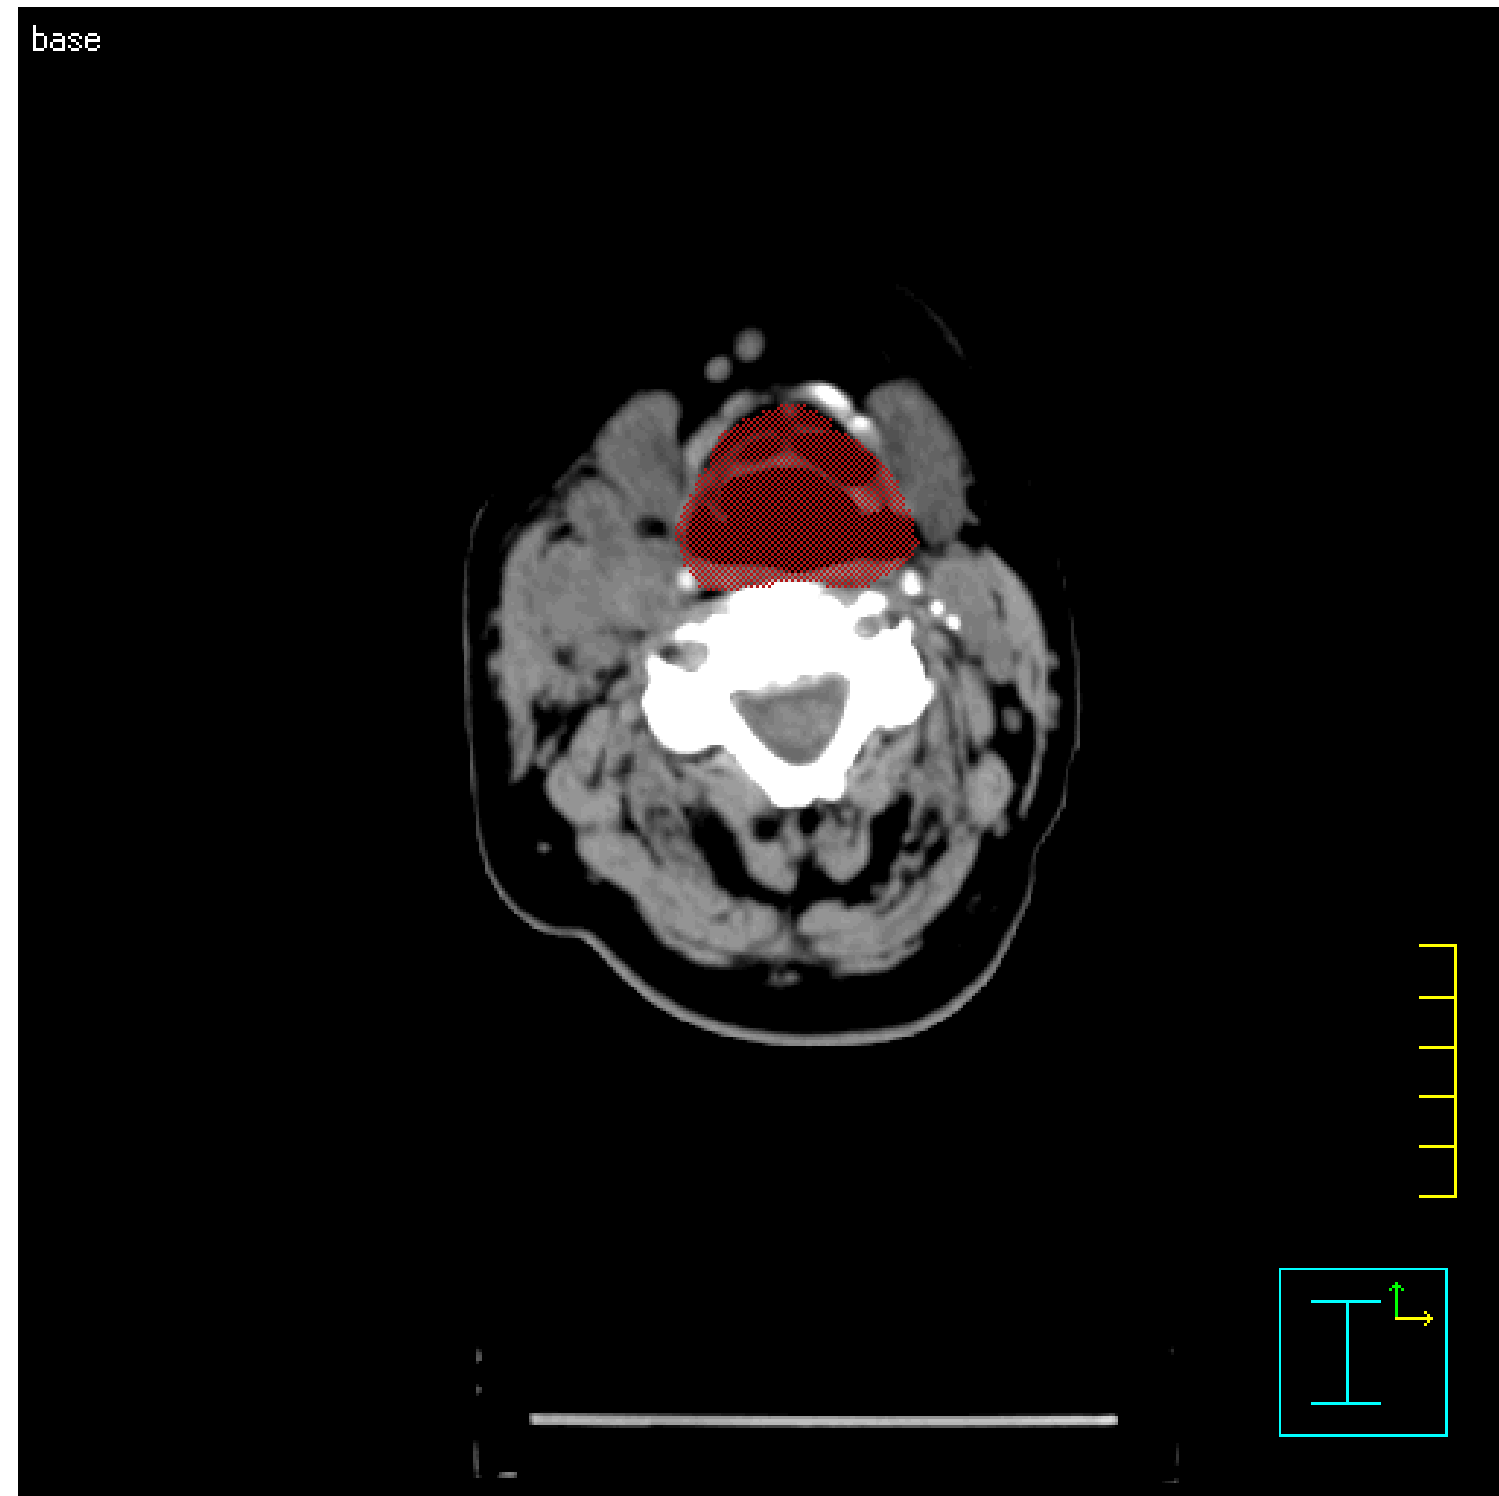

Patient Name: Protocol ID: , Patient ID:

Date / Time: Mon Oct 7 13:47:43 2013

Revision:

MRN:

Comment:

Planner:

Plan Name:

Physician / Physicist:

Institution:

Trial Name:

Pinnacle ID:

Links: [planDB](#)

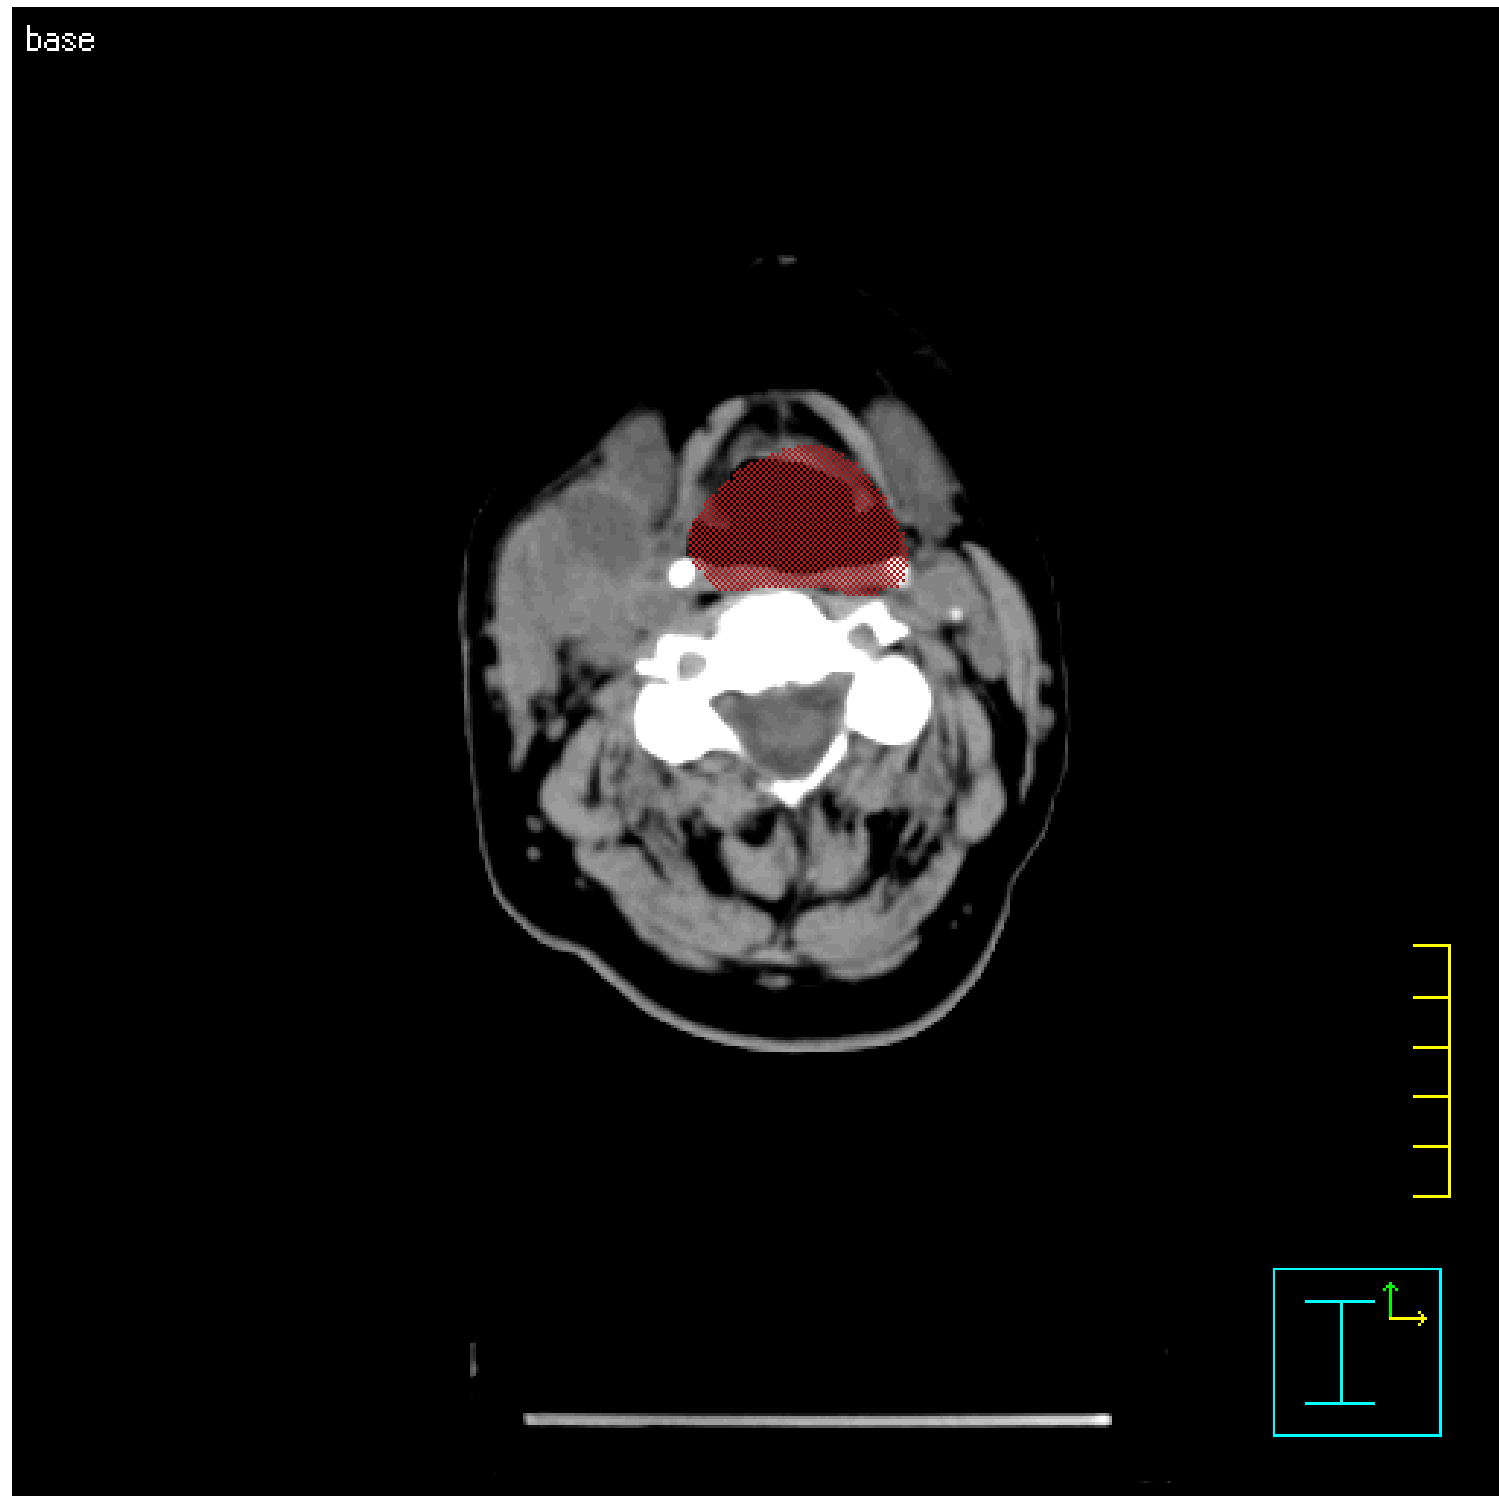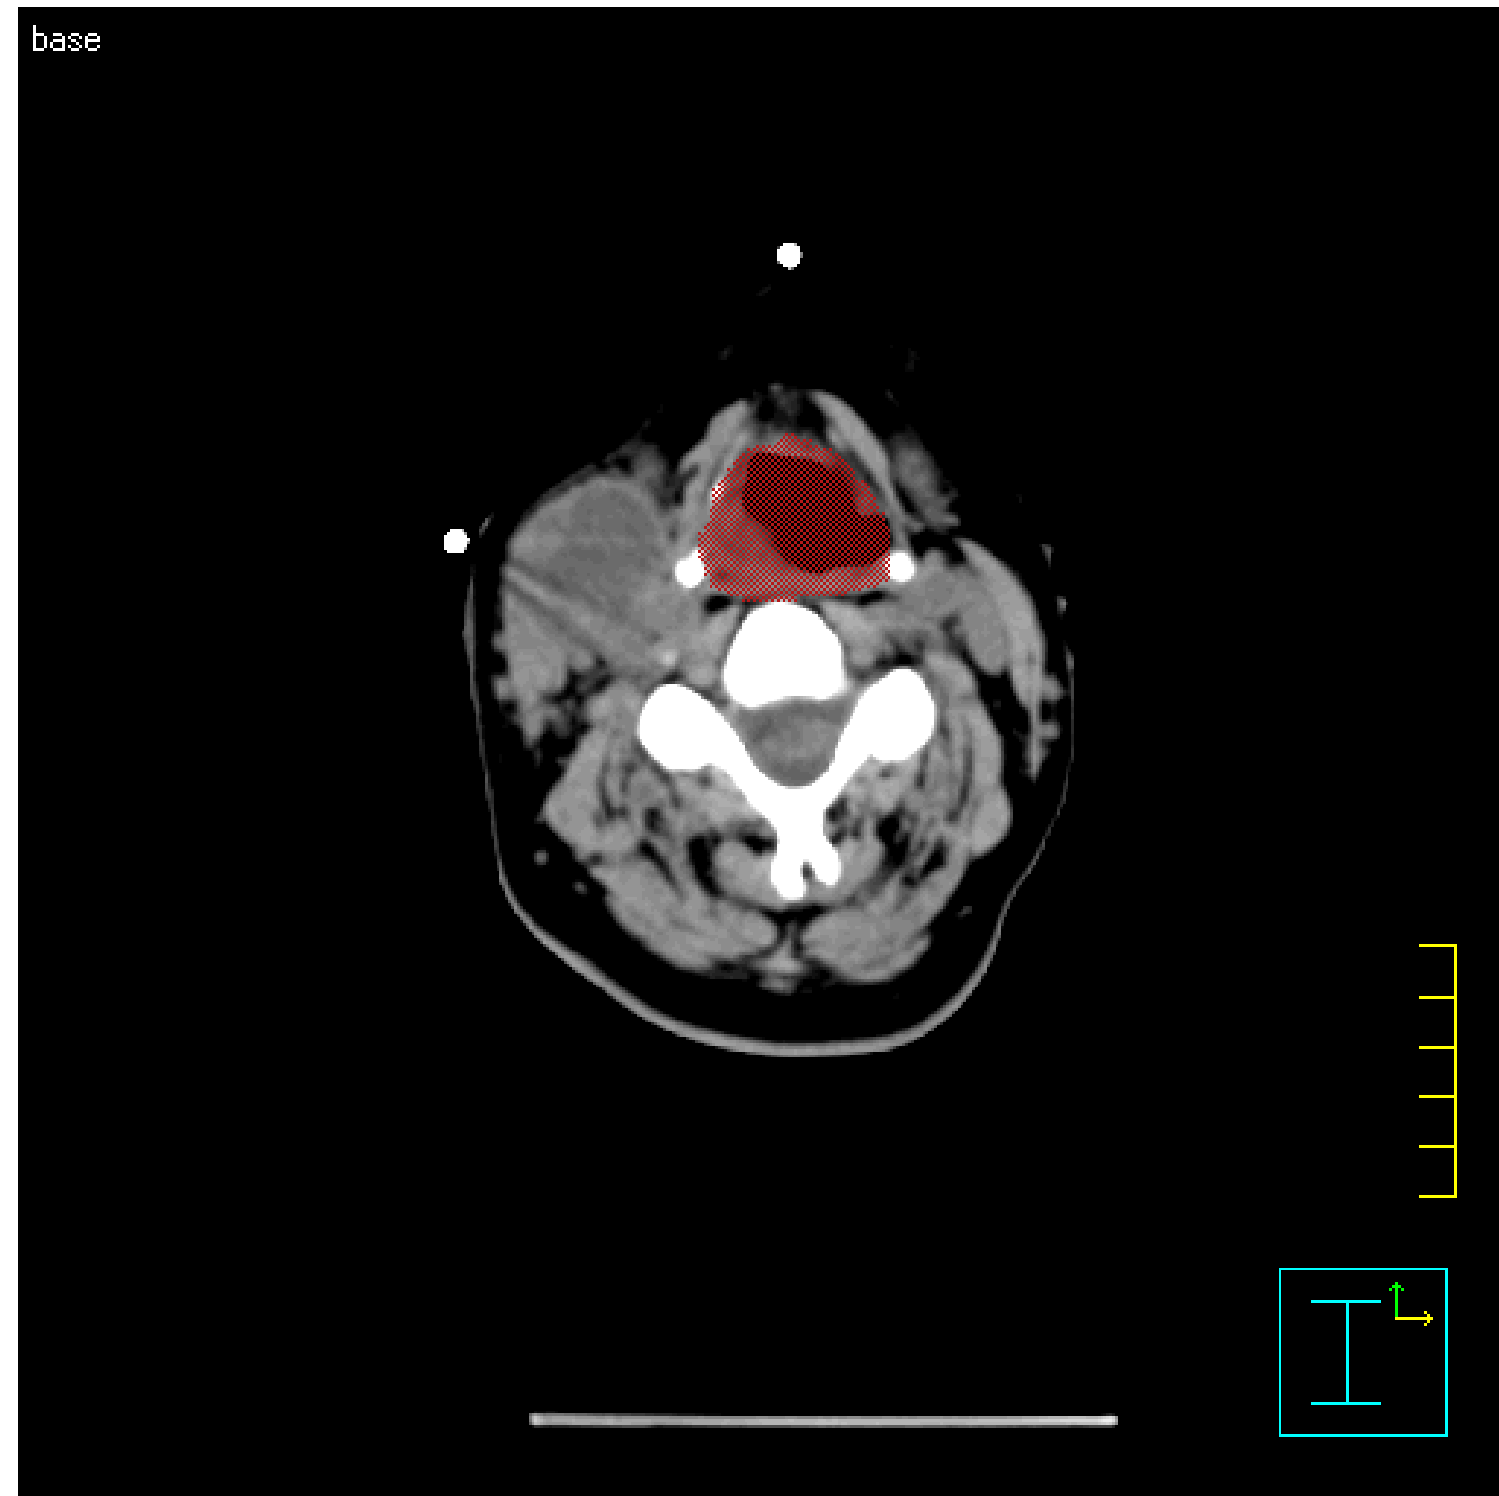

Patient Name: Protocol ID: , Patient ID:

Date / Time: Mon Oct 7 13:47:43 2013

Revision:

MRN:

Comment:

Planner:

Plan Name:

Physician / Physicist:

Institution:

Trial Name:

Pinnacle ID:

Links: [planDB](#)

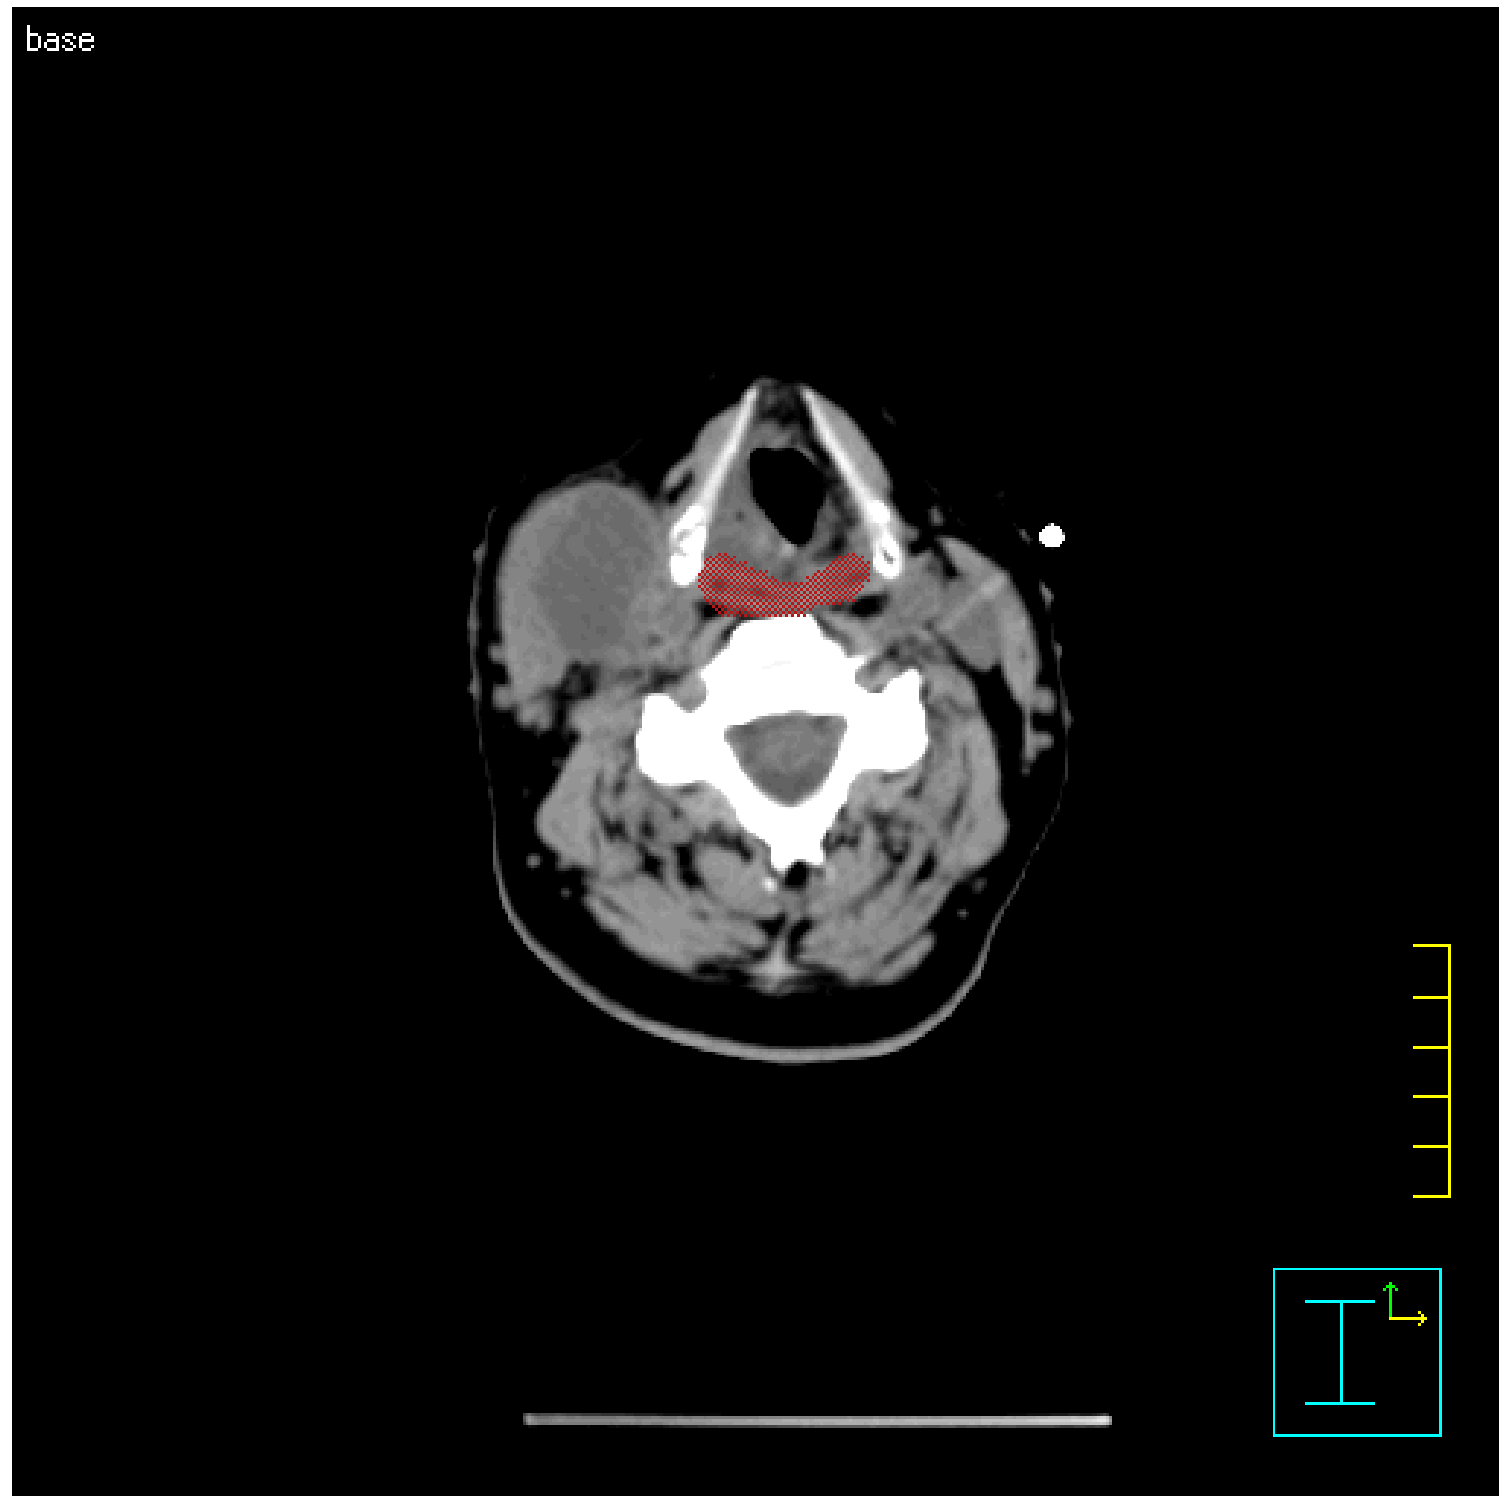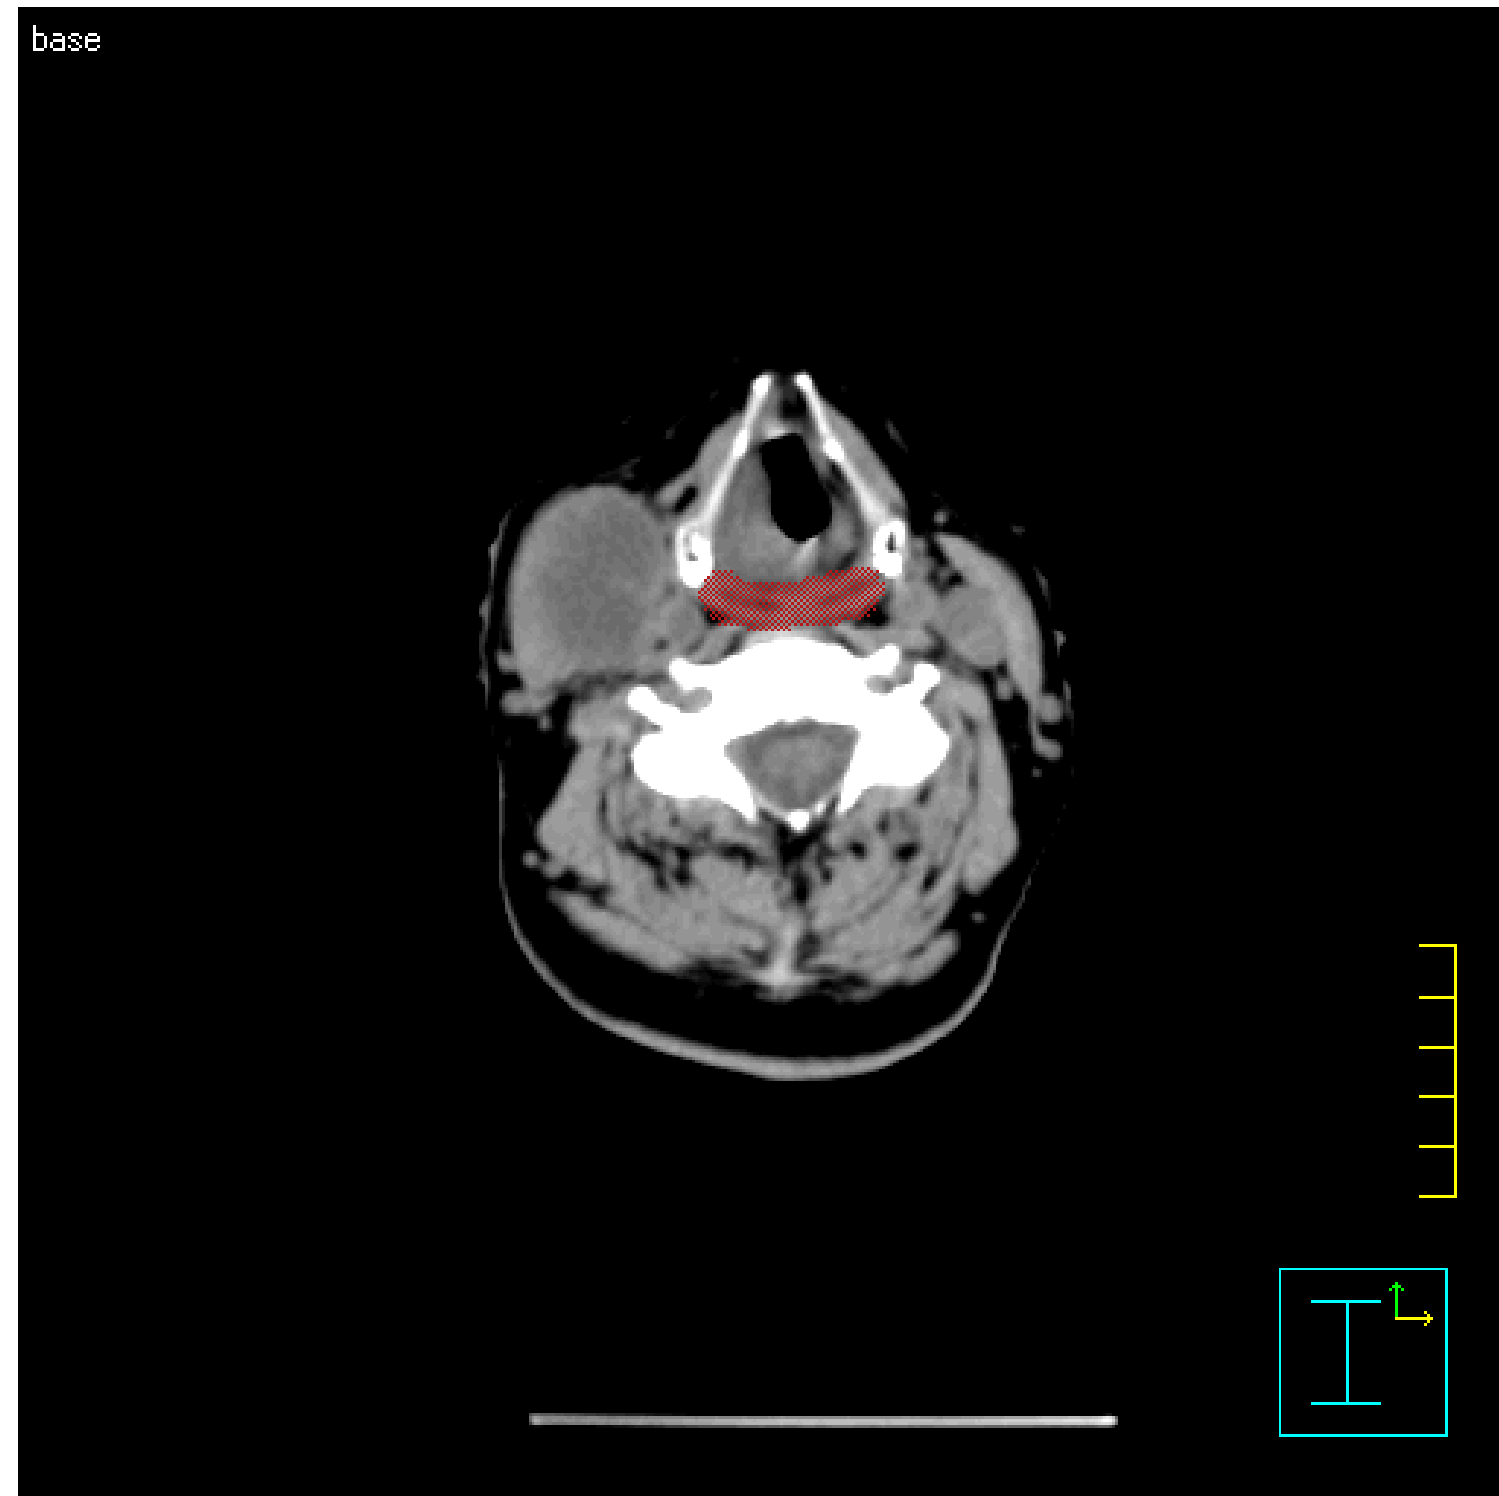



Patient Name: Protocol ID: , Patient ID:

Date / Time: Mon Oct 7 13:47:43 2013

Revision:

MRN:

Comment:

Planner:

Plan Name:

Physician / Physicist:

Institution:

Trial Name:

Pinnacle ID:

Links: [planDB](#)

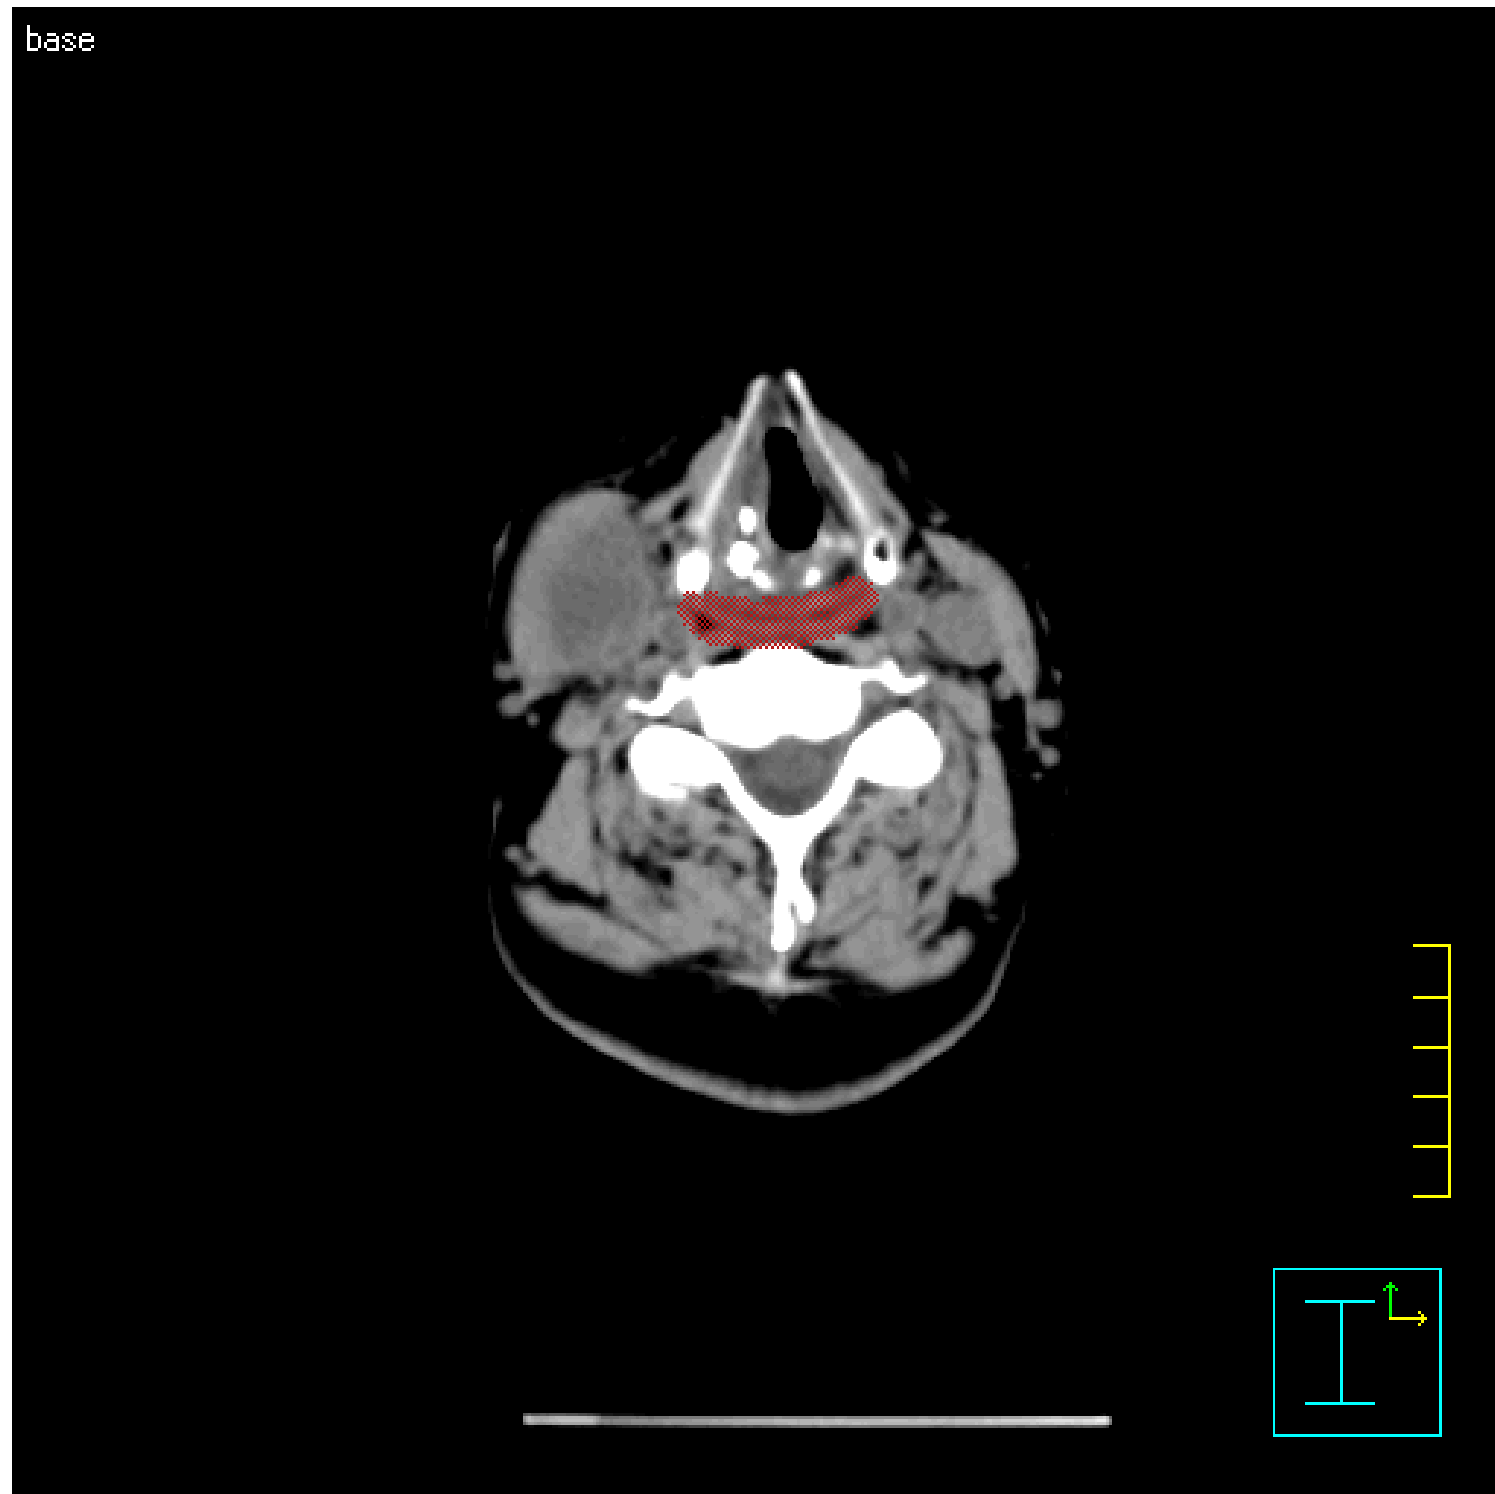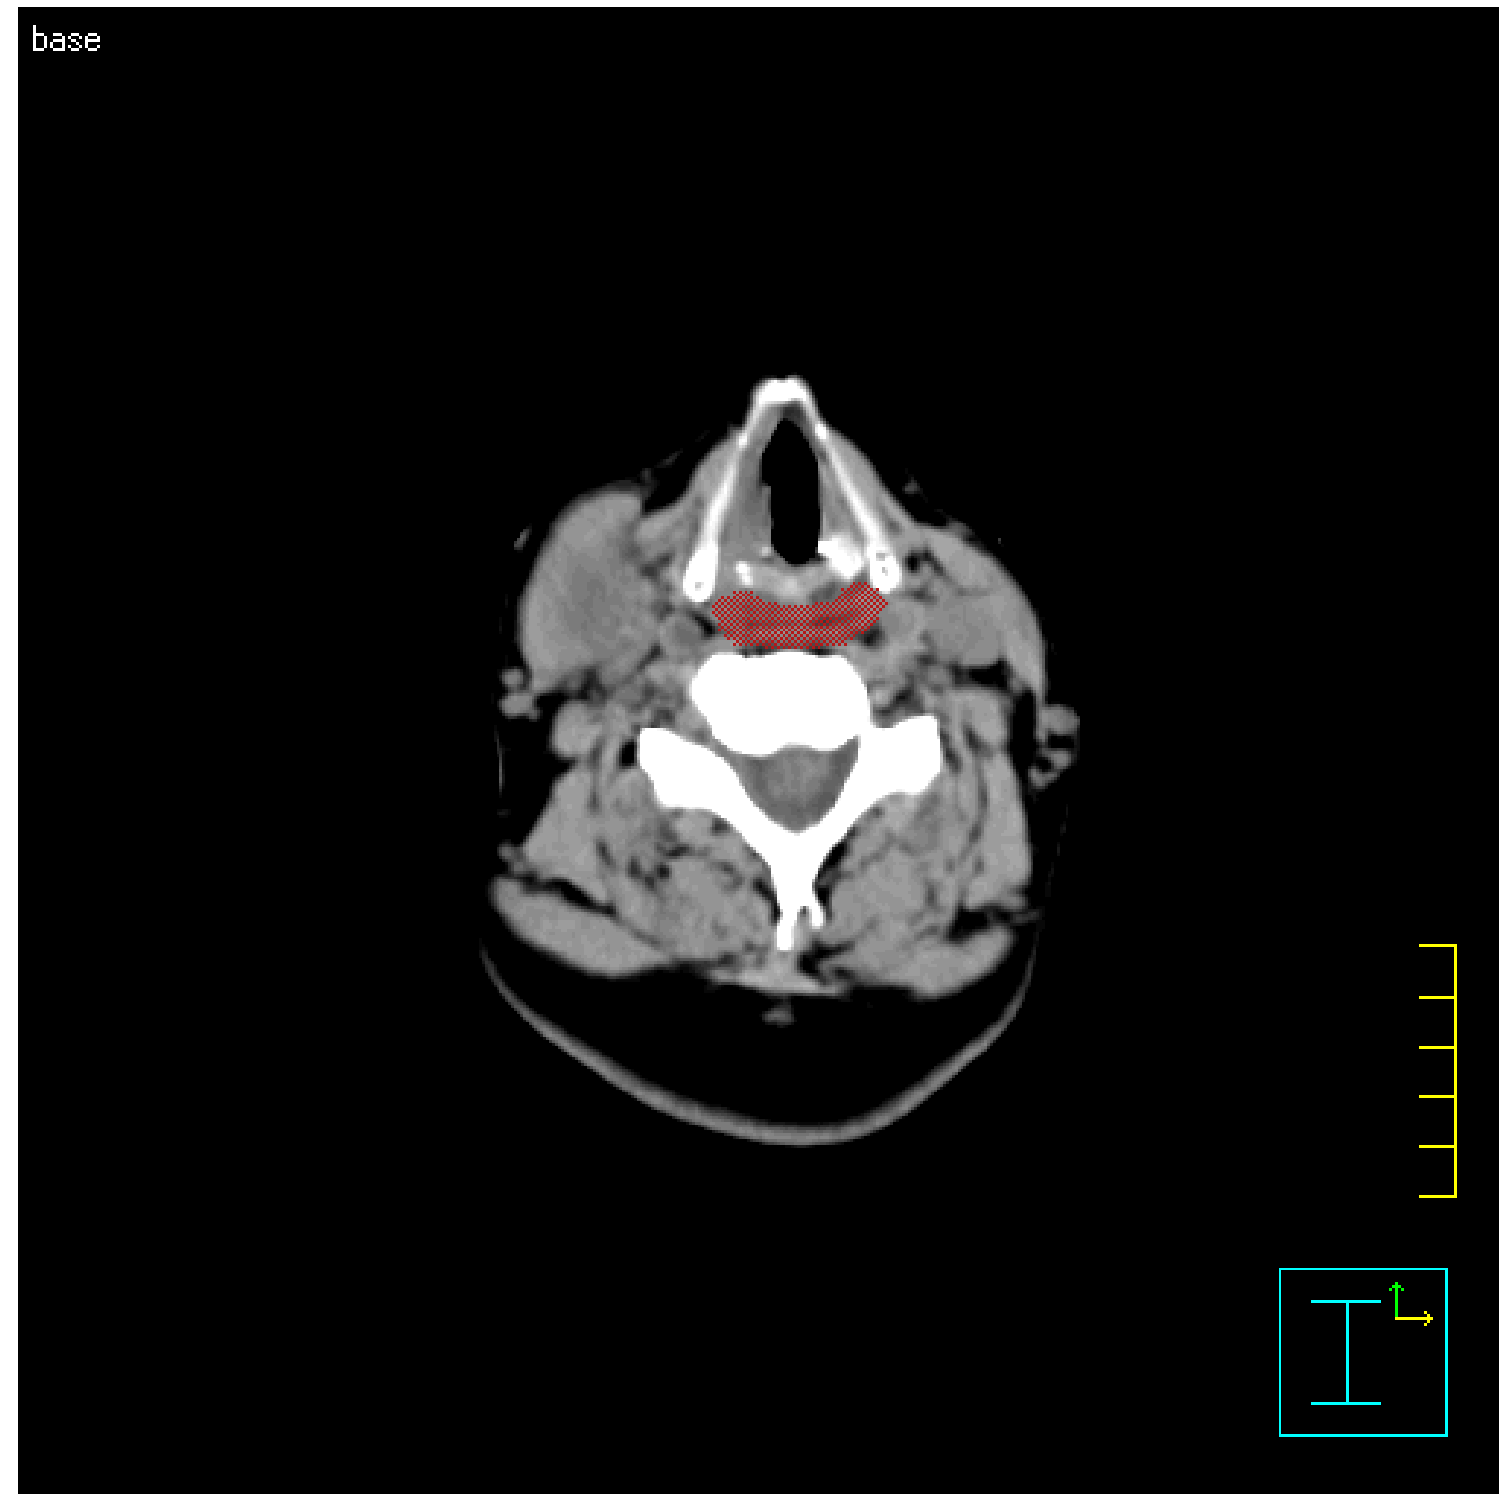

Patient Name: **Protocol ID: , Patient ID:**

Date / Time: Mon Oct 7 13:47:43 2013

Revision:

MRN:

Comment:

Planner:

Plan Name:

Physician / Physicist:

Institution:

Trial Name:

Pinnacle ID:

Links: [planDB](#)

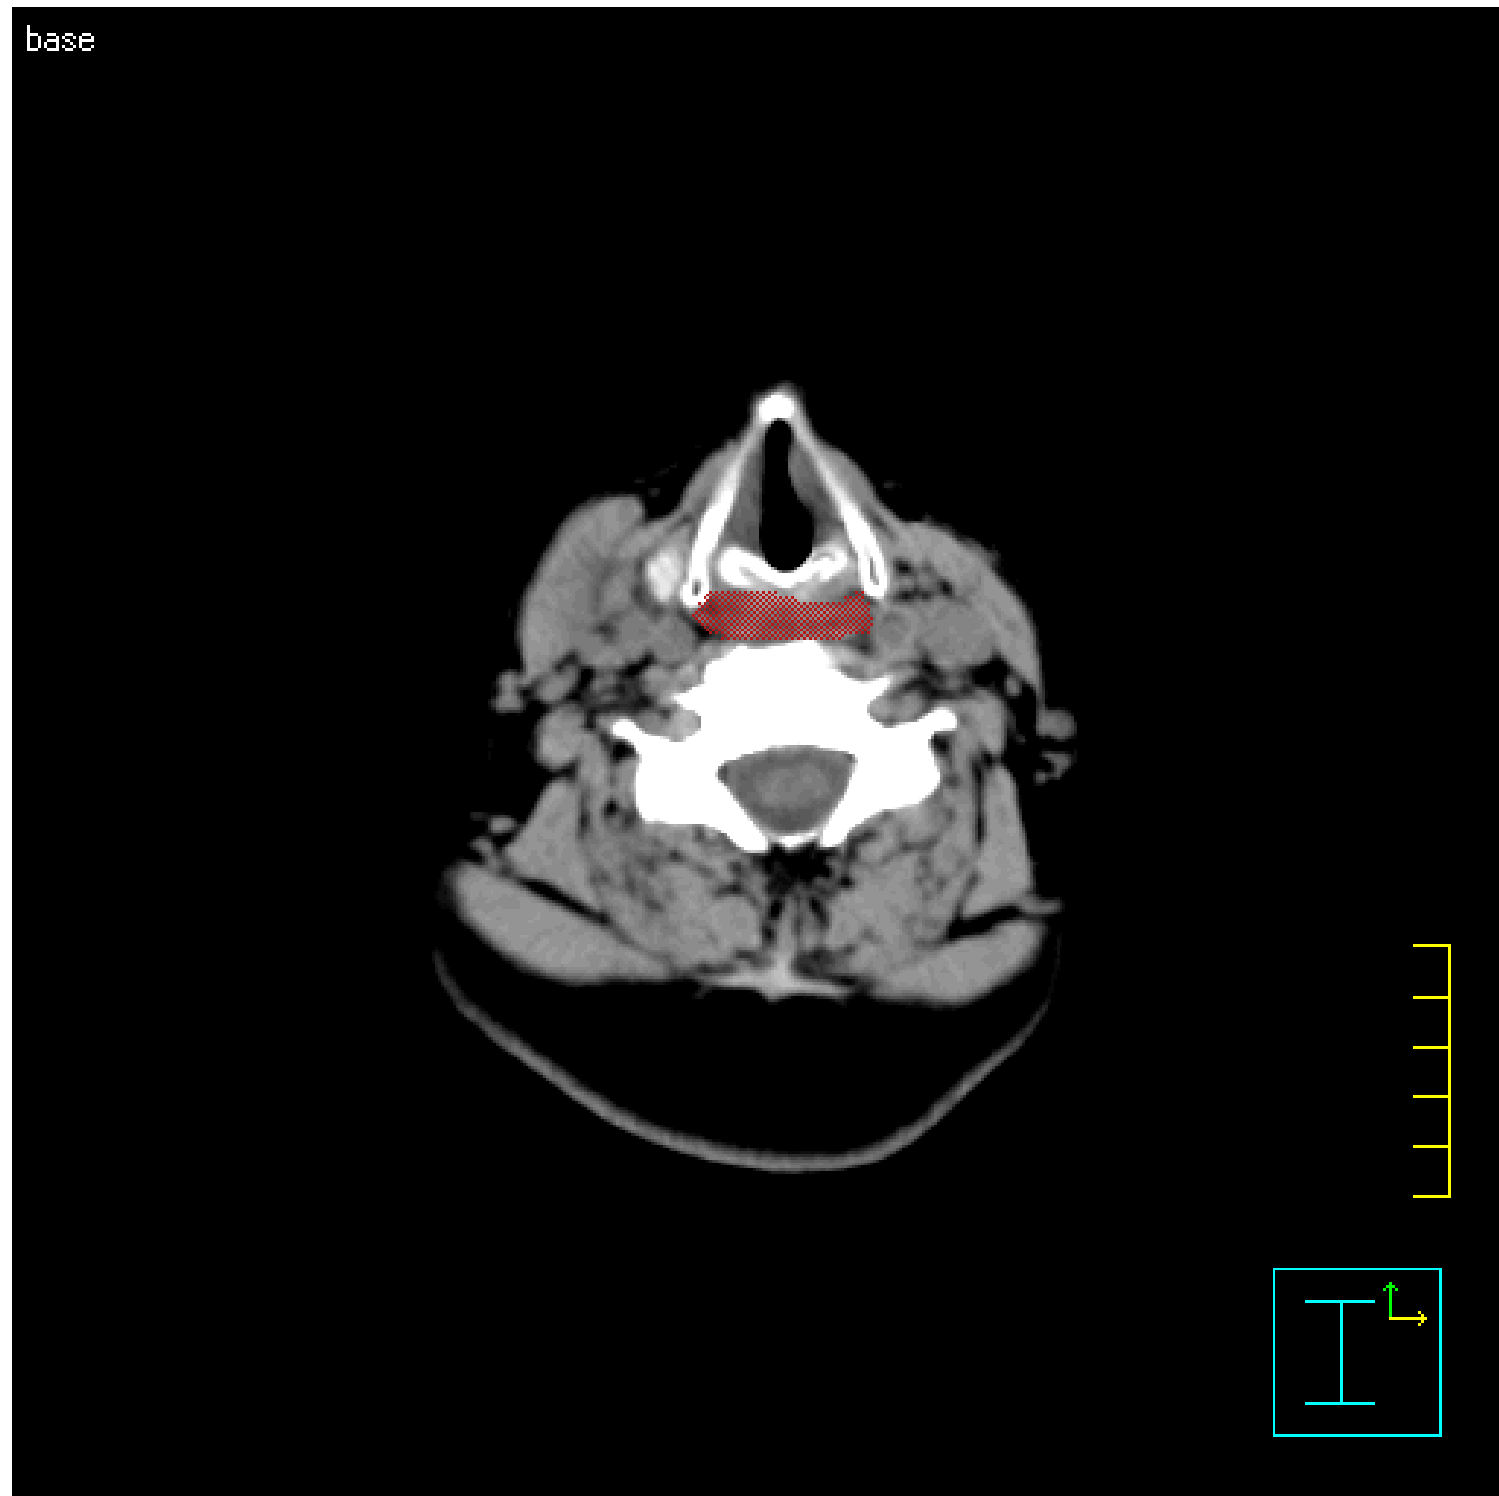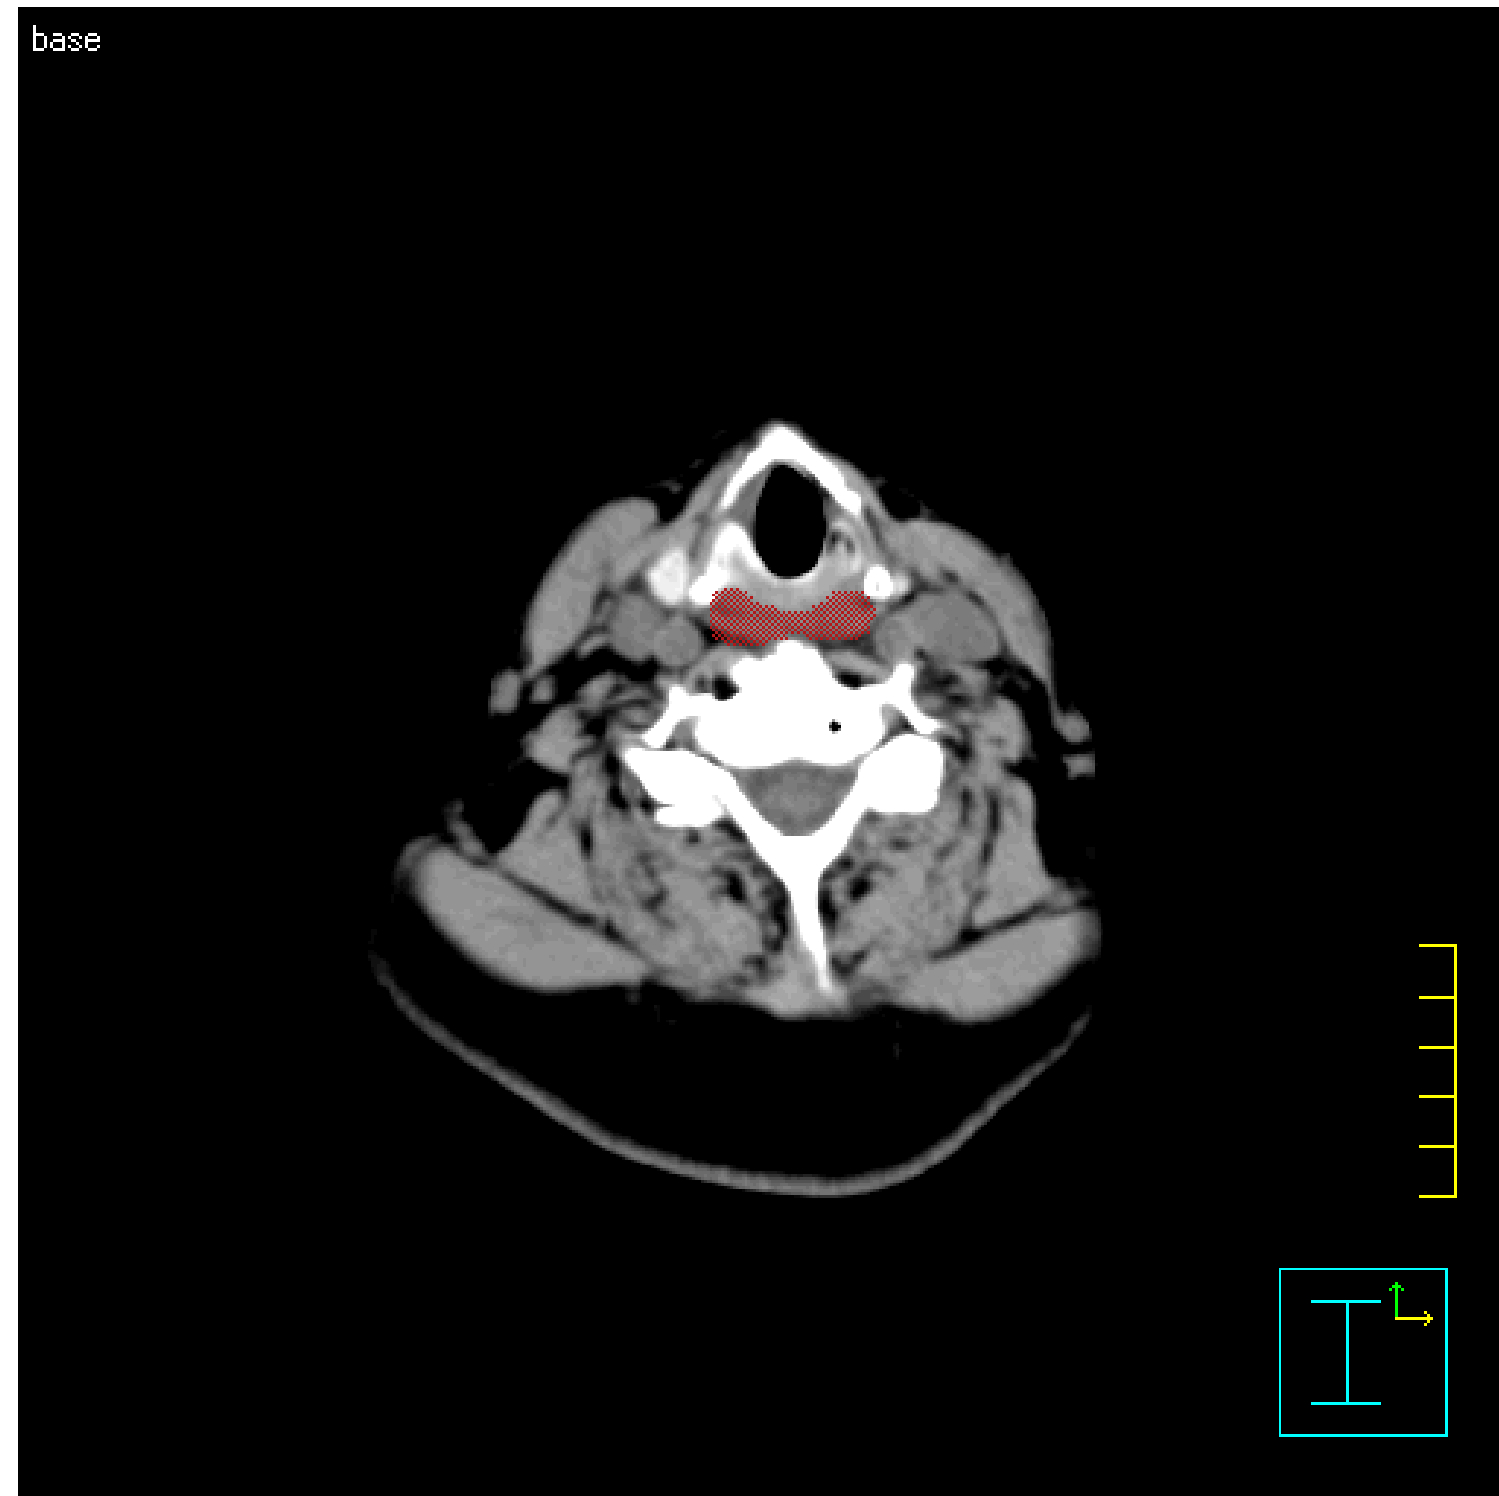

Patient Name: Protocol ID: , Patient ID:

Date / Time: Thu Oct 10 09:44:56 2013

Revision:

MRN:

Comment:

Planner:

Plan Name:

Physician / Physicist:

Institution:

Trial Name:

Pinnacle ID:

Links: [planDB](#)

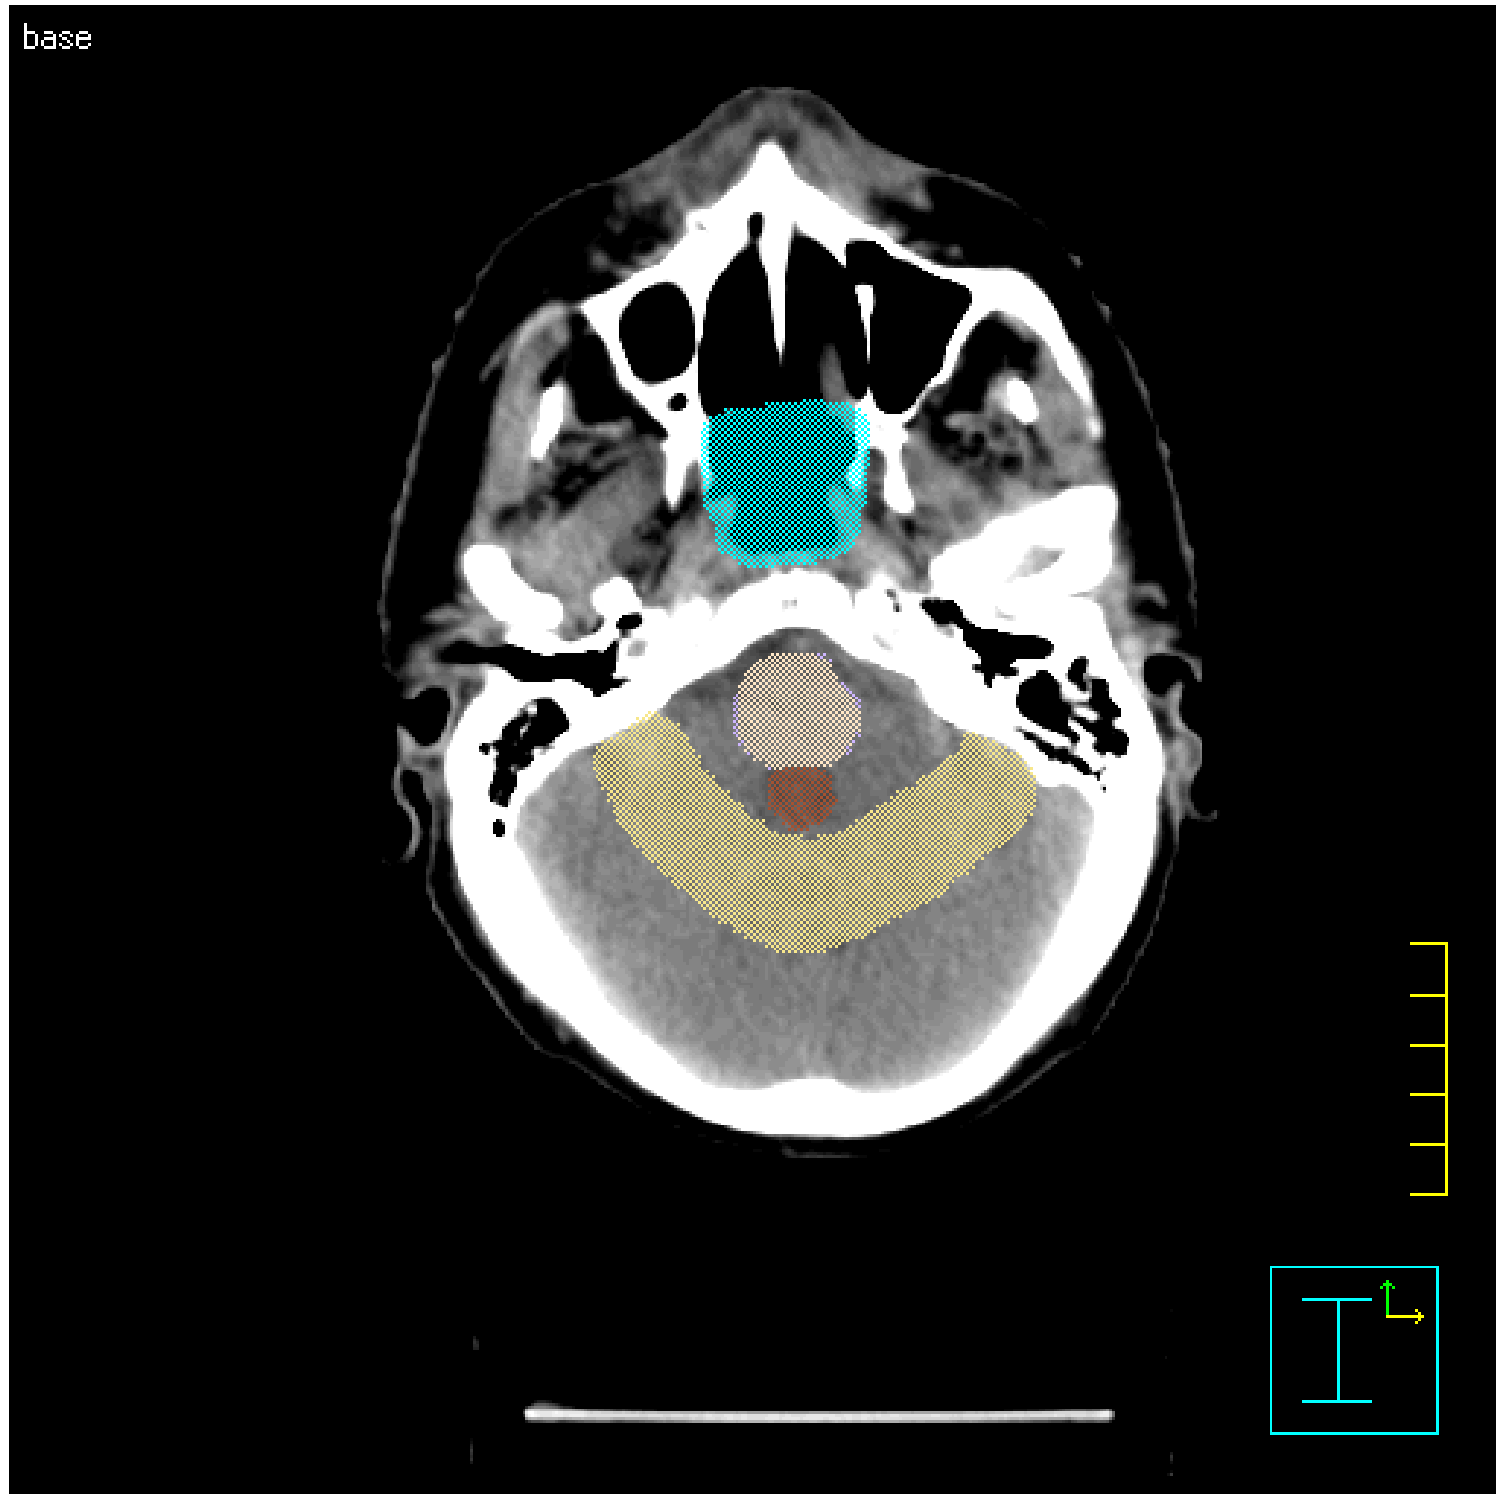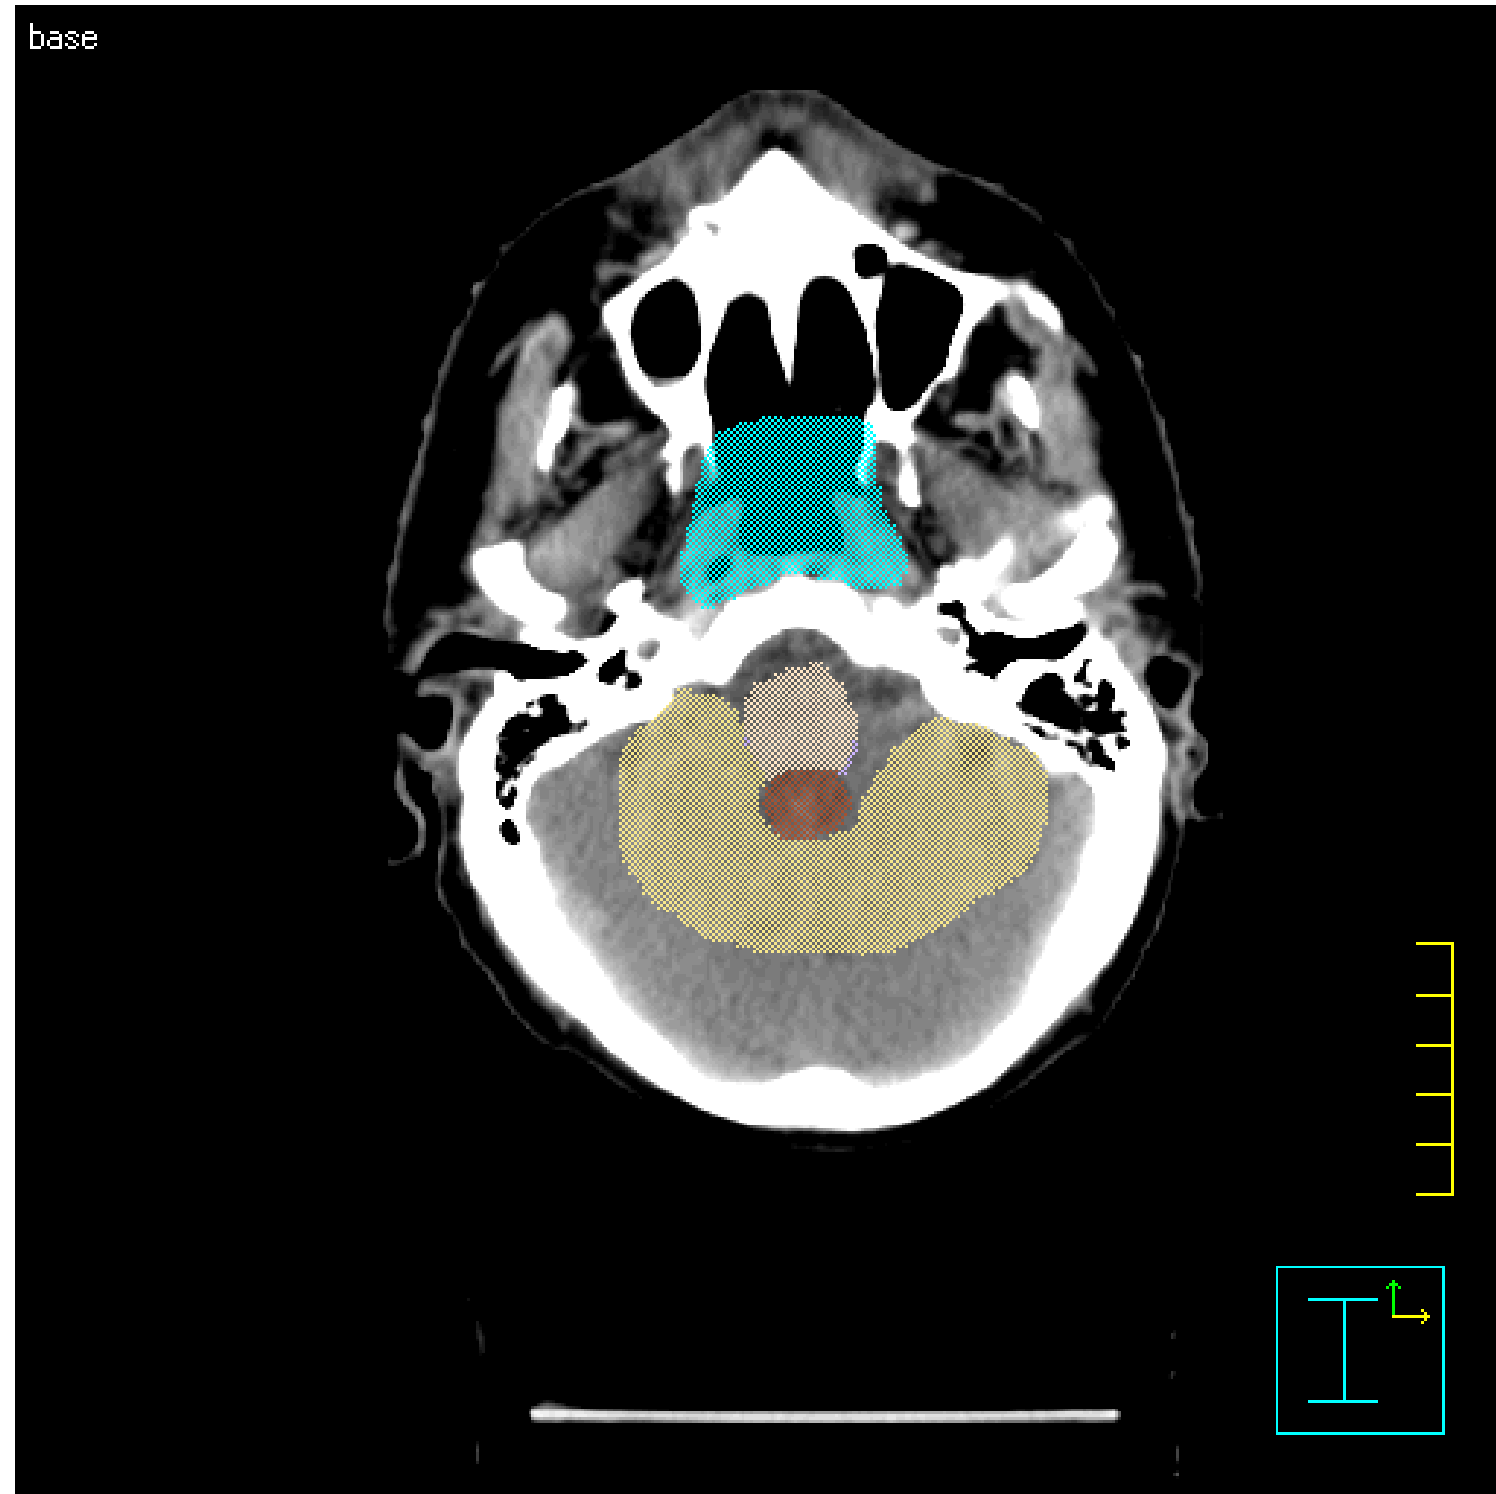

Patient Name: Protocol ID: , Patient ID:

Date / Time: Thu Oct 10 09:44:56 2013

Revision:

MRN:

Comment:

Planner:

Plan Name:

Physician / Physicist:

Institution:

Trial Name:

Pinnacle ID:

Links: [planDB](#)

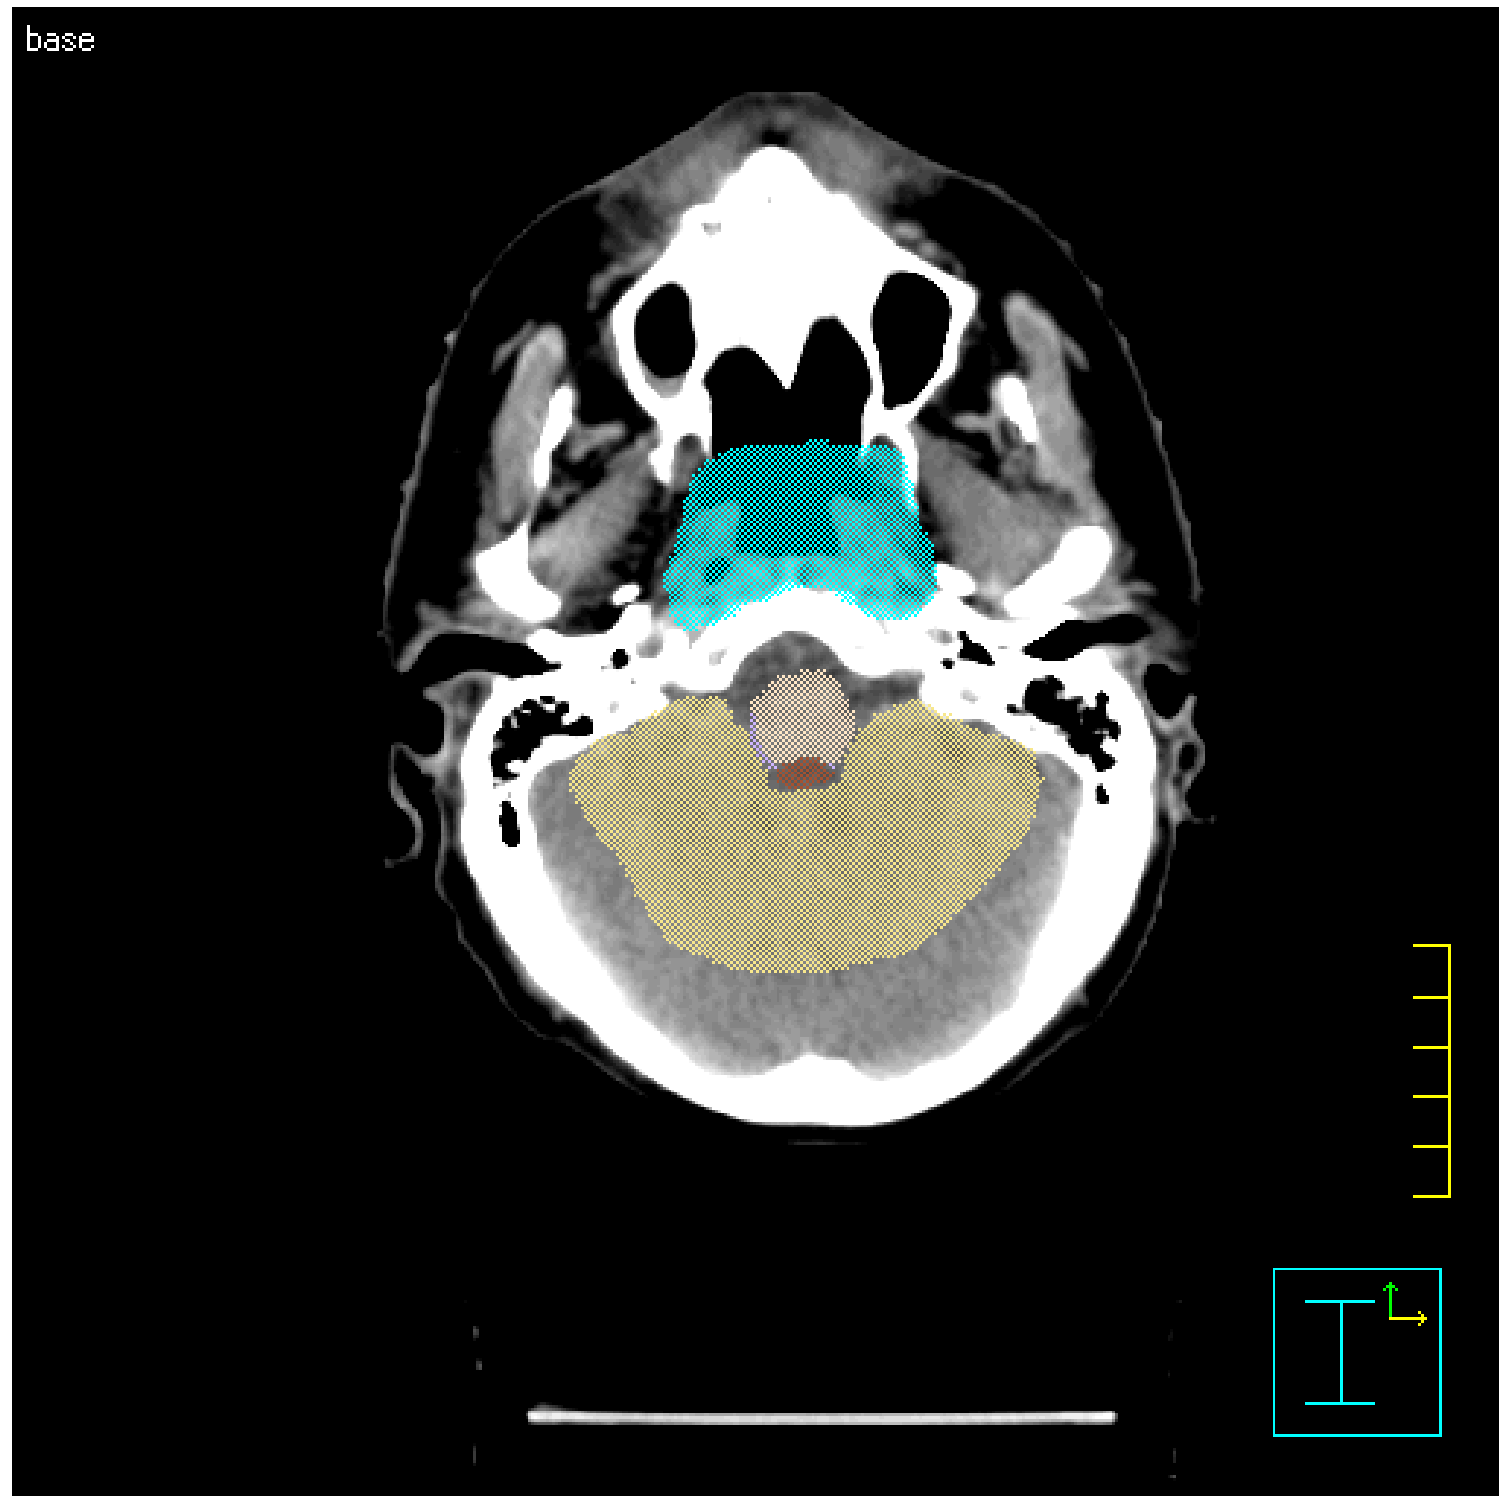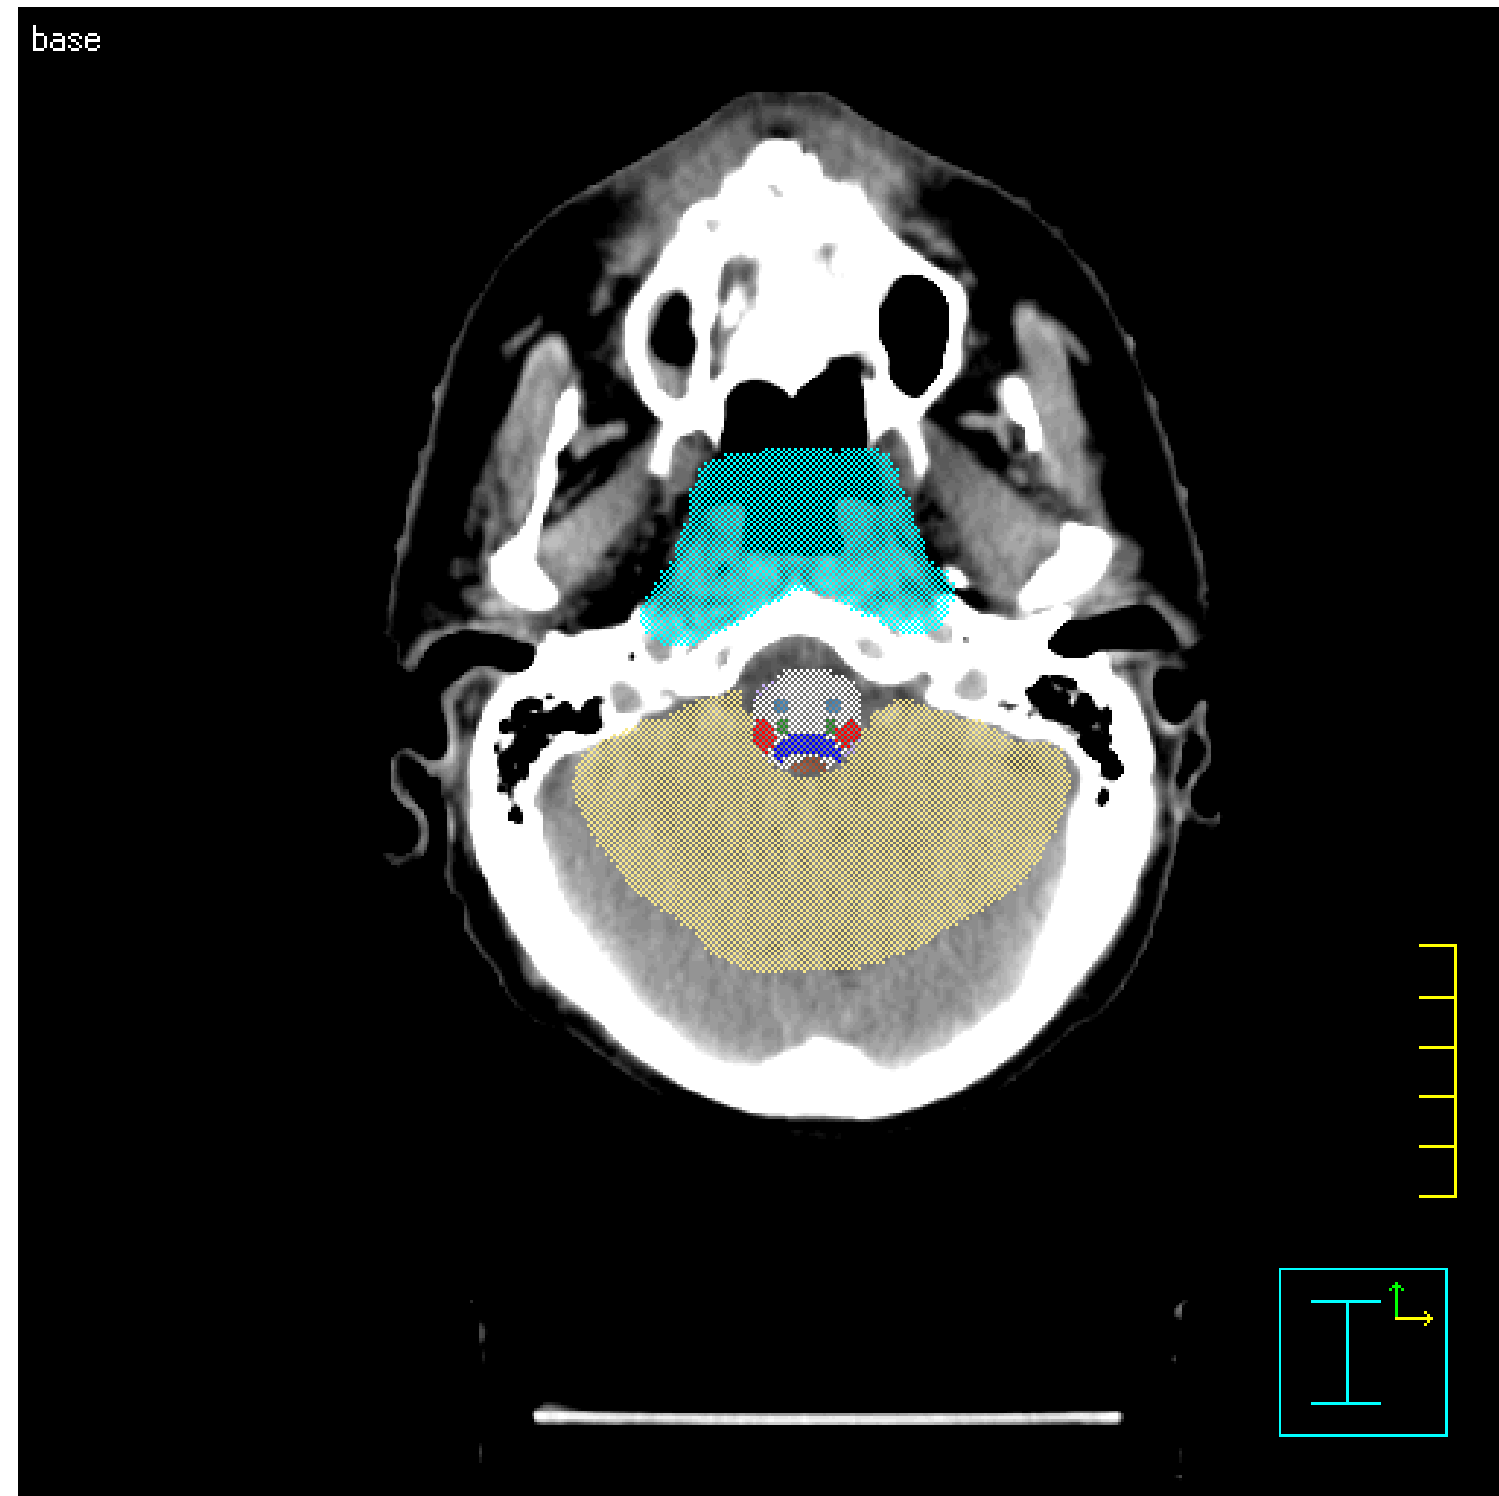

Patient Name: Protocol ID: , Patient ID:

Date / Time: Thu Oct 10 09:44:56 2013

Revision:

MRN:

Comment:

Planner:

Plan Name:

Physician / Physicist:

Institution:

Trial Name:

Pinnacle ID:

Links: [planDB](#)

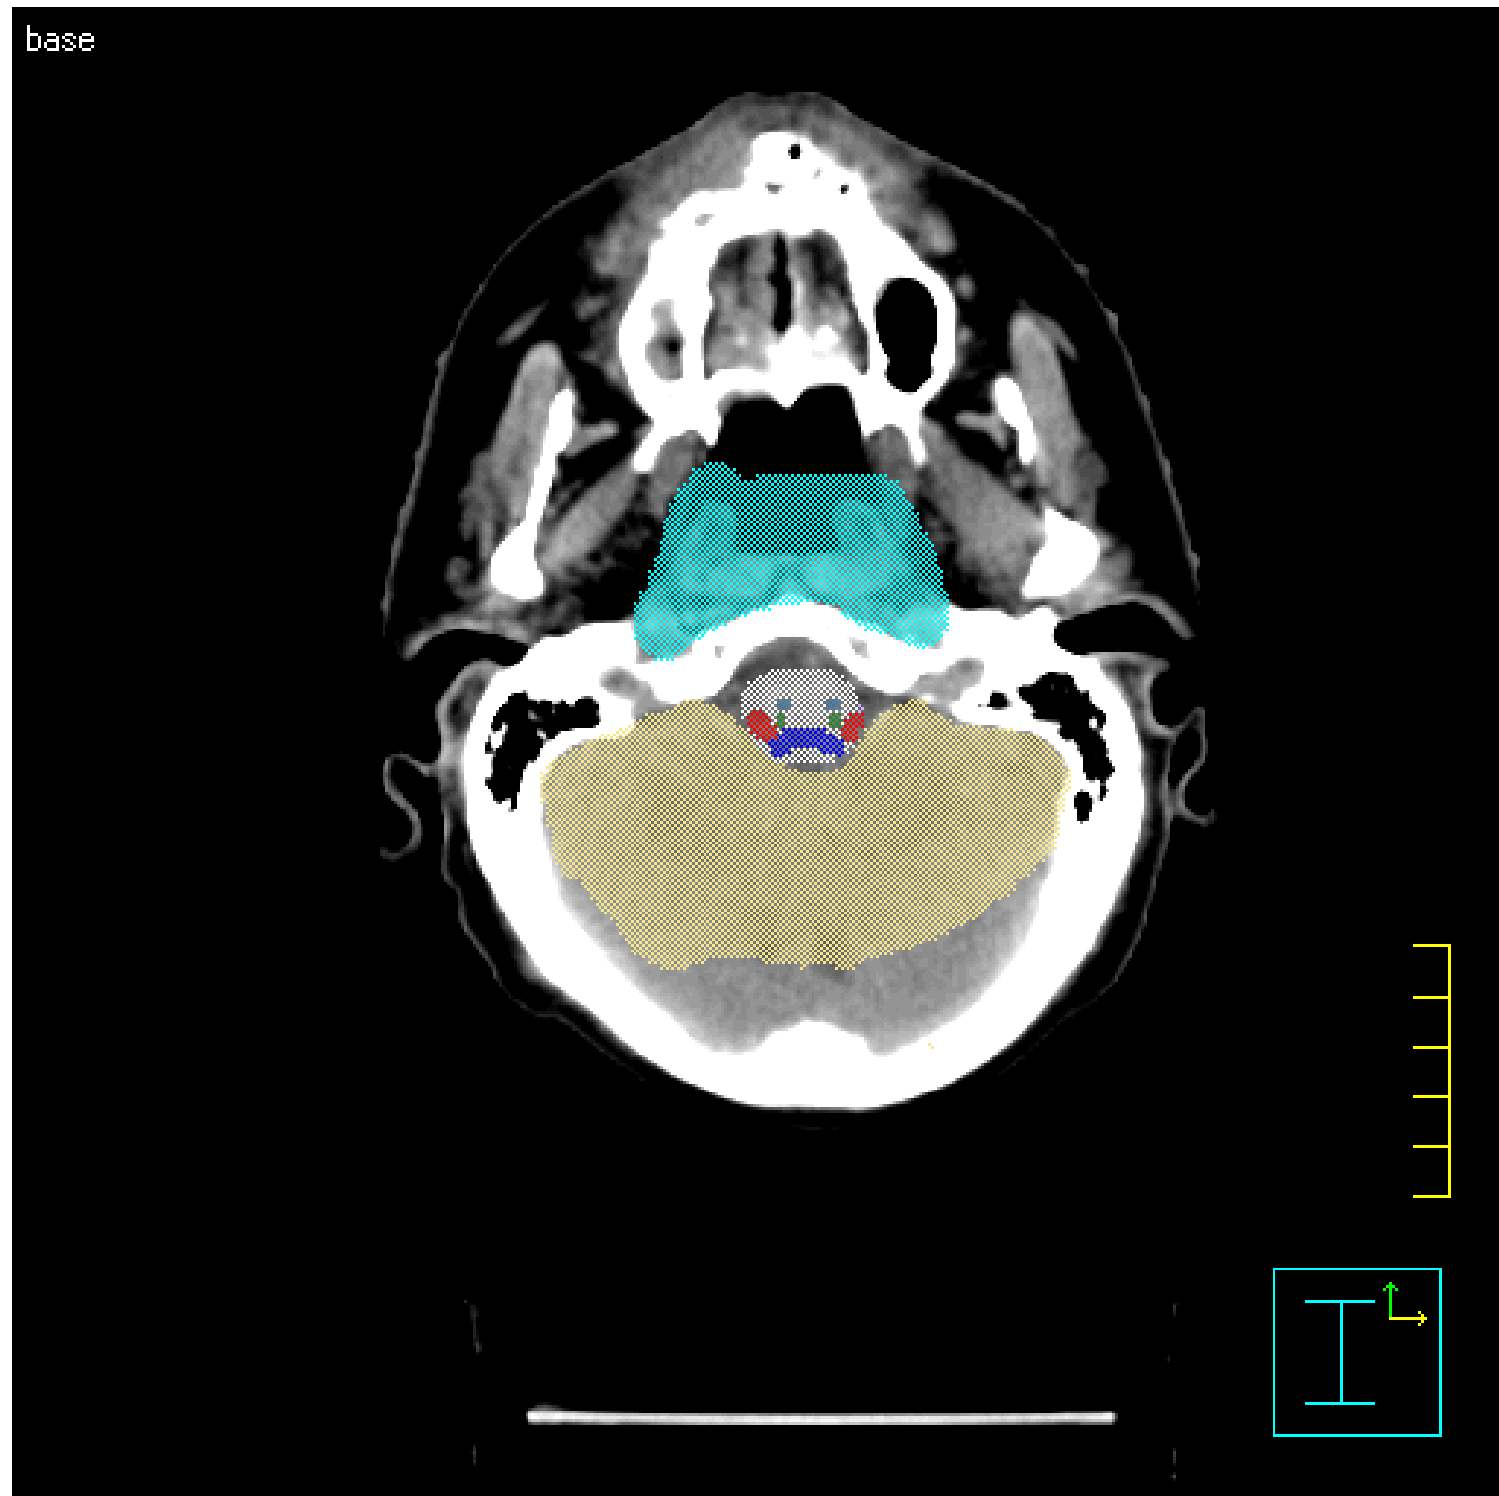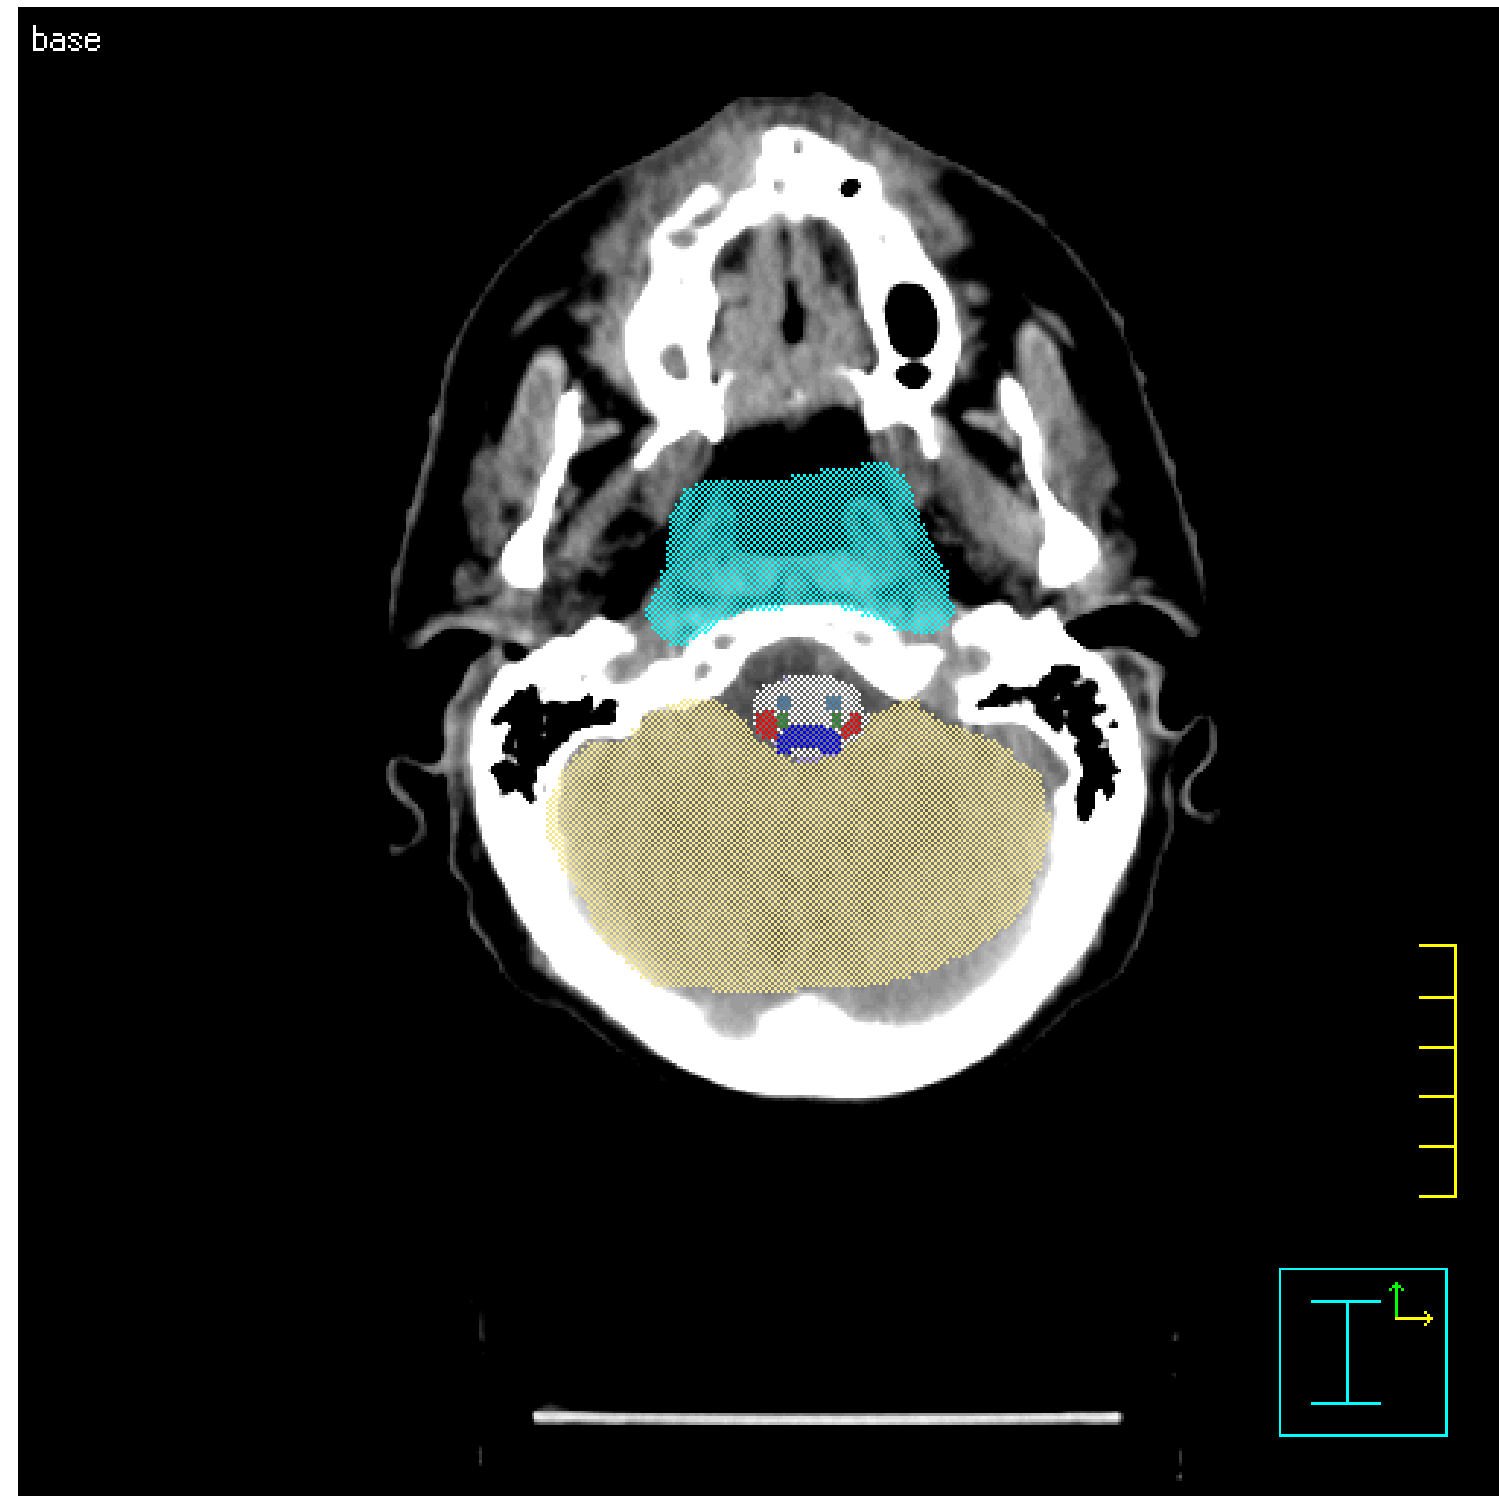

Patient Name: Protocol ID: , Patient ID:

Date / Time: Thu Oct 10 09:44:56 2013

Revision:

MRN:

Comment:

Planner:

Plan Name:

Physician / Physicist:

Institution:

Trial Name:

Pinnacle ID:

Links: [planDB](#)

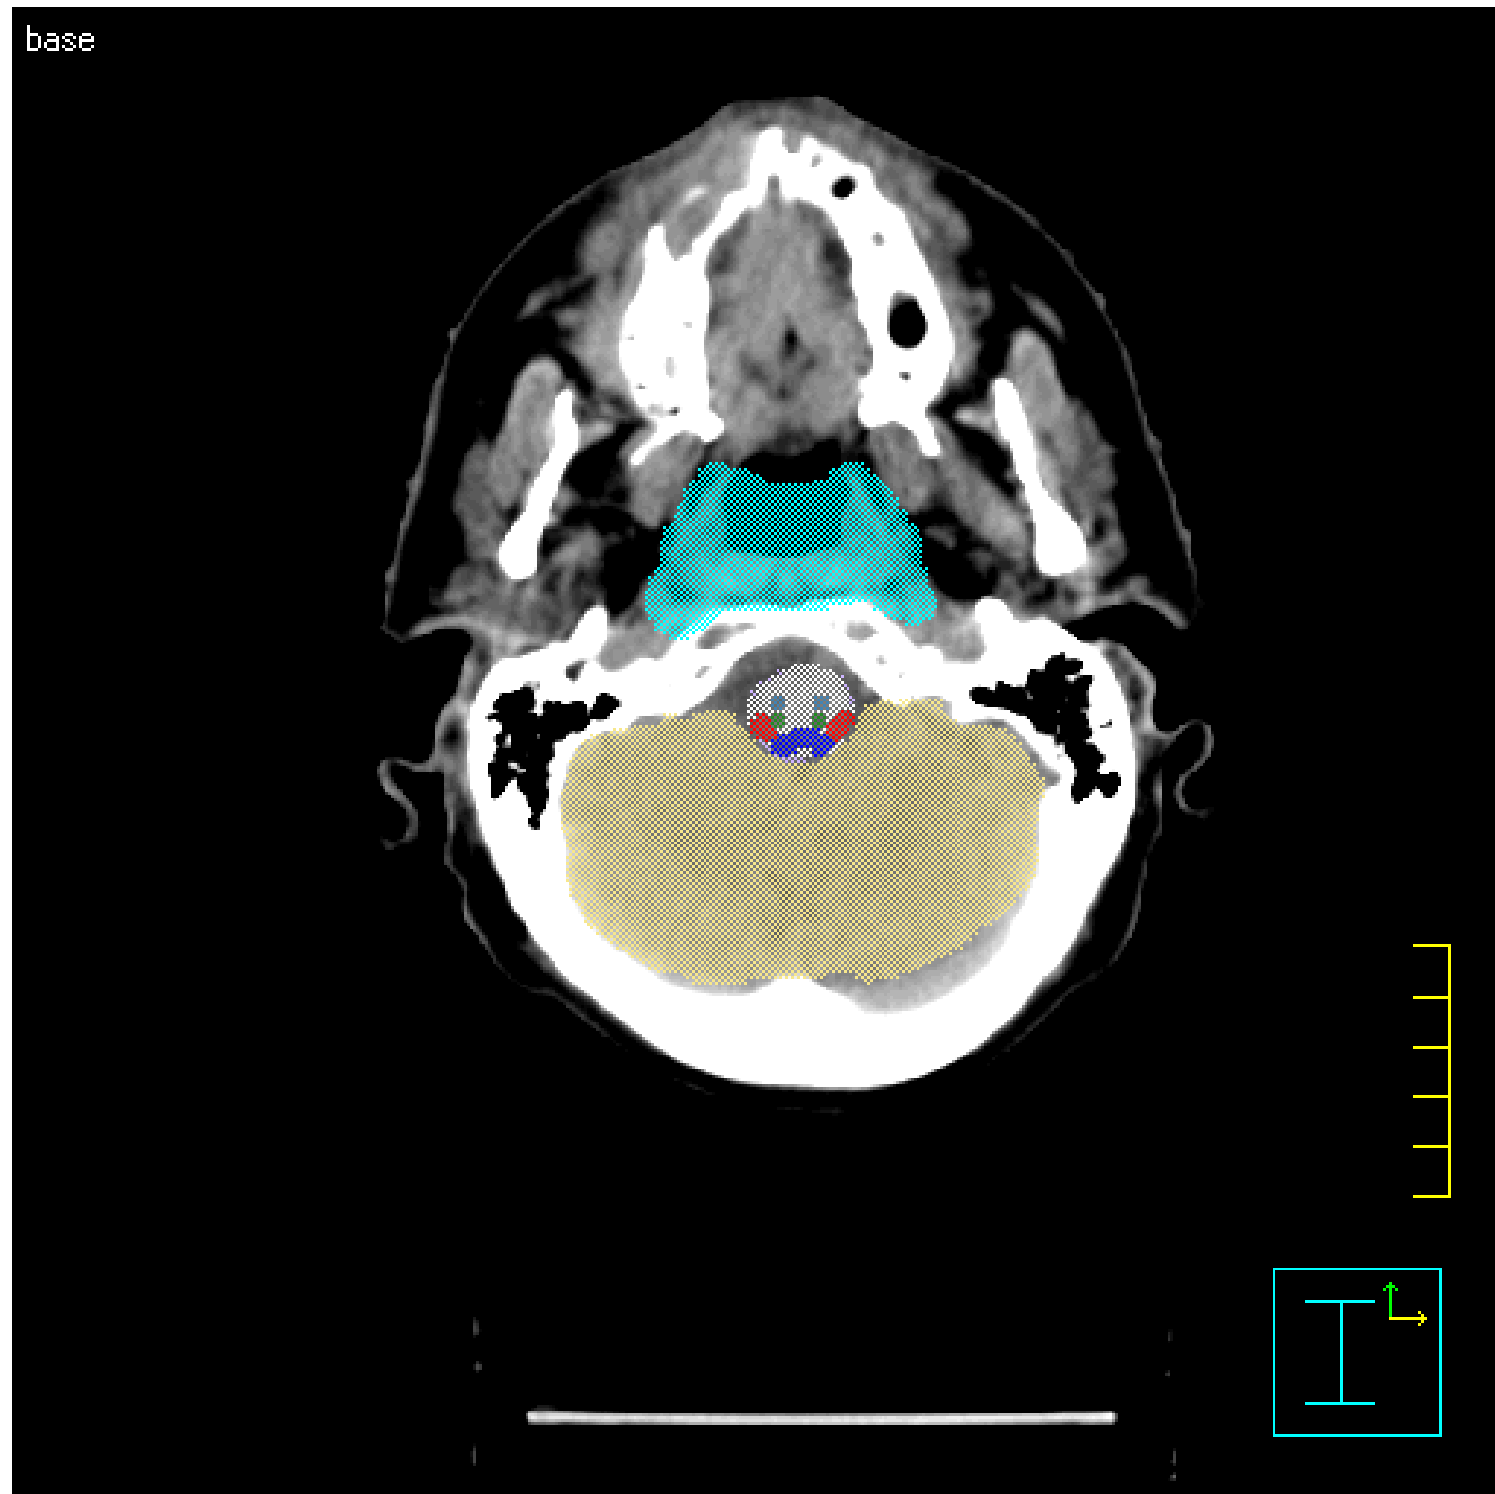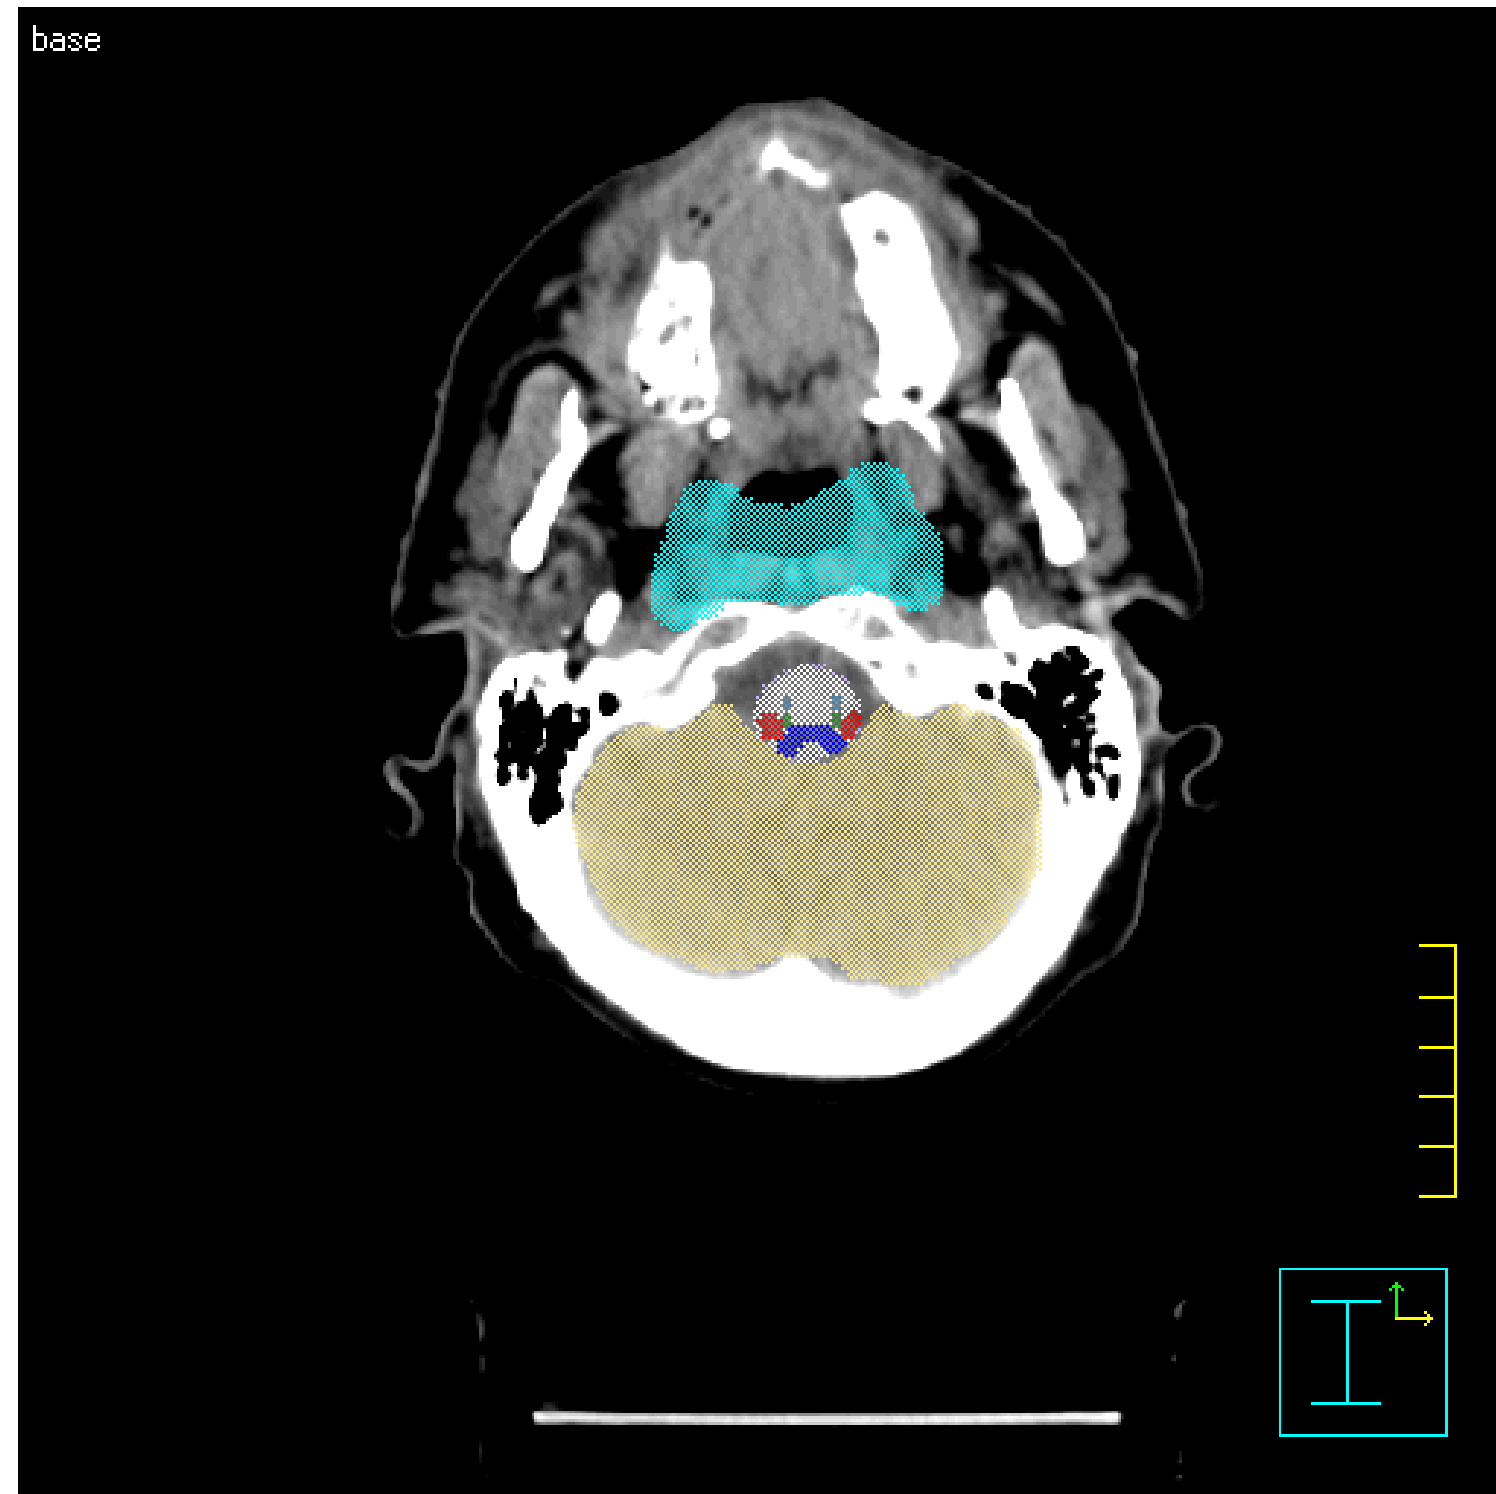

Patient Name: Protocol ID: , Patient ID:

Date / Time: Thu Oct 10 09:44:56 2013

Revision:

MRN:

Comment:

Planner:

Plan Name:

Physician / Physicist:

Institution:

Trial Name:

Pinnacle ID:

Links: [planDB](#)

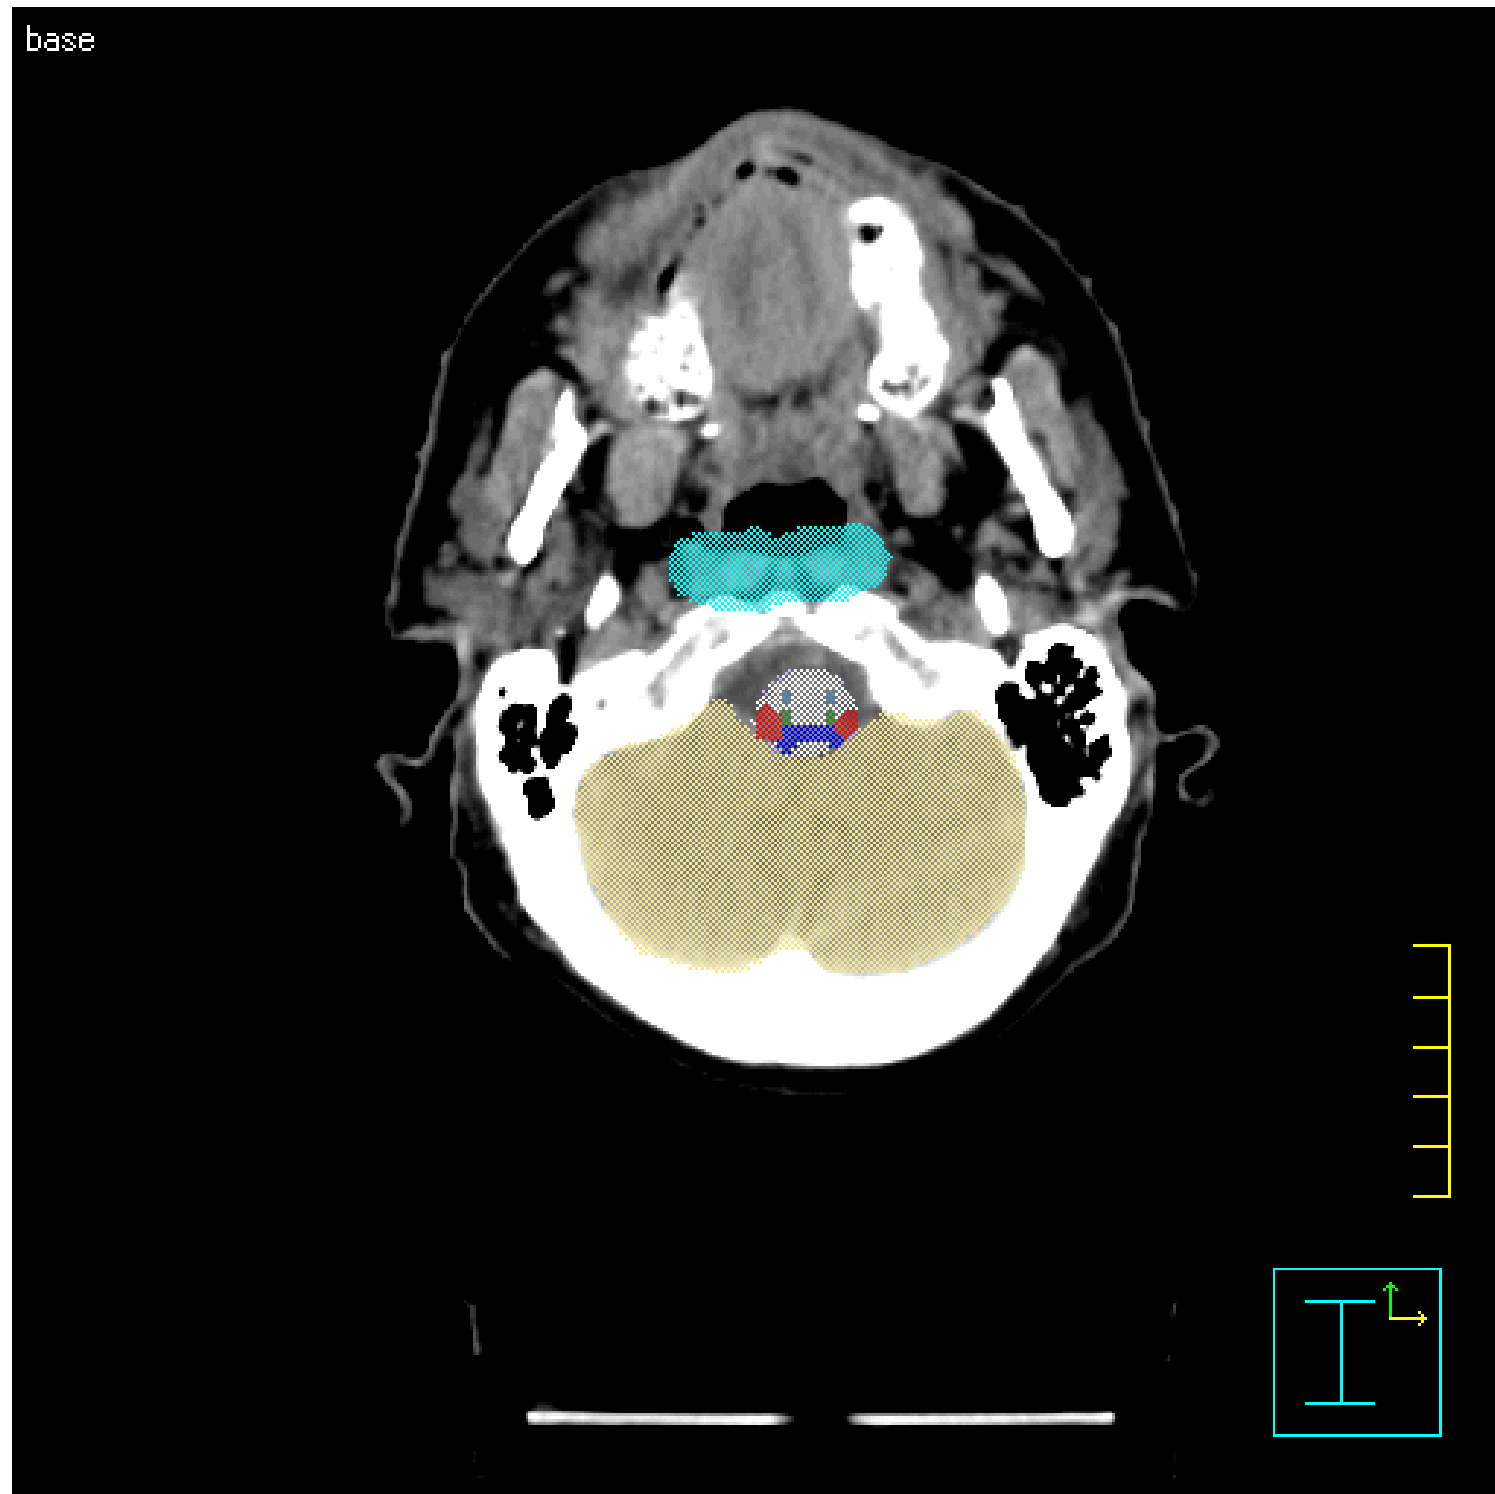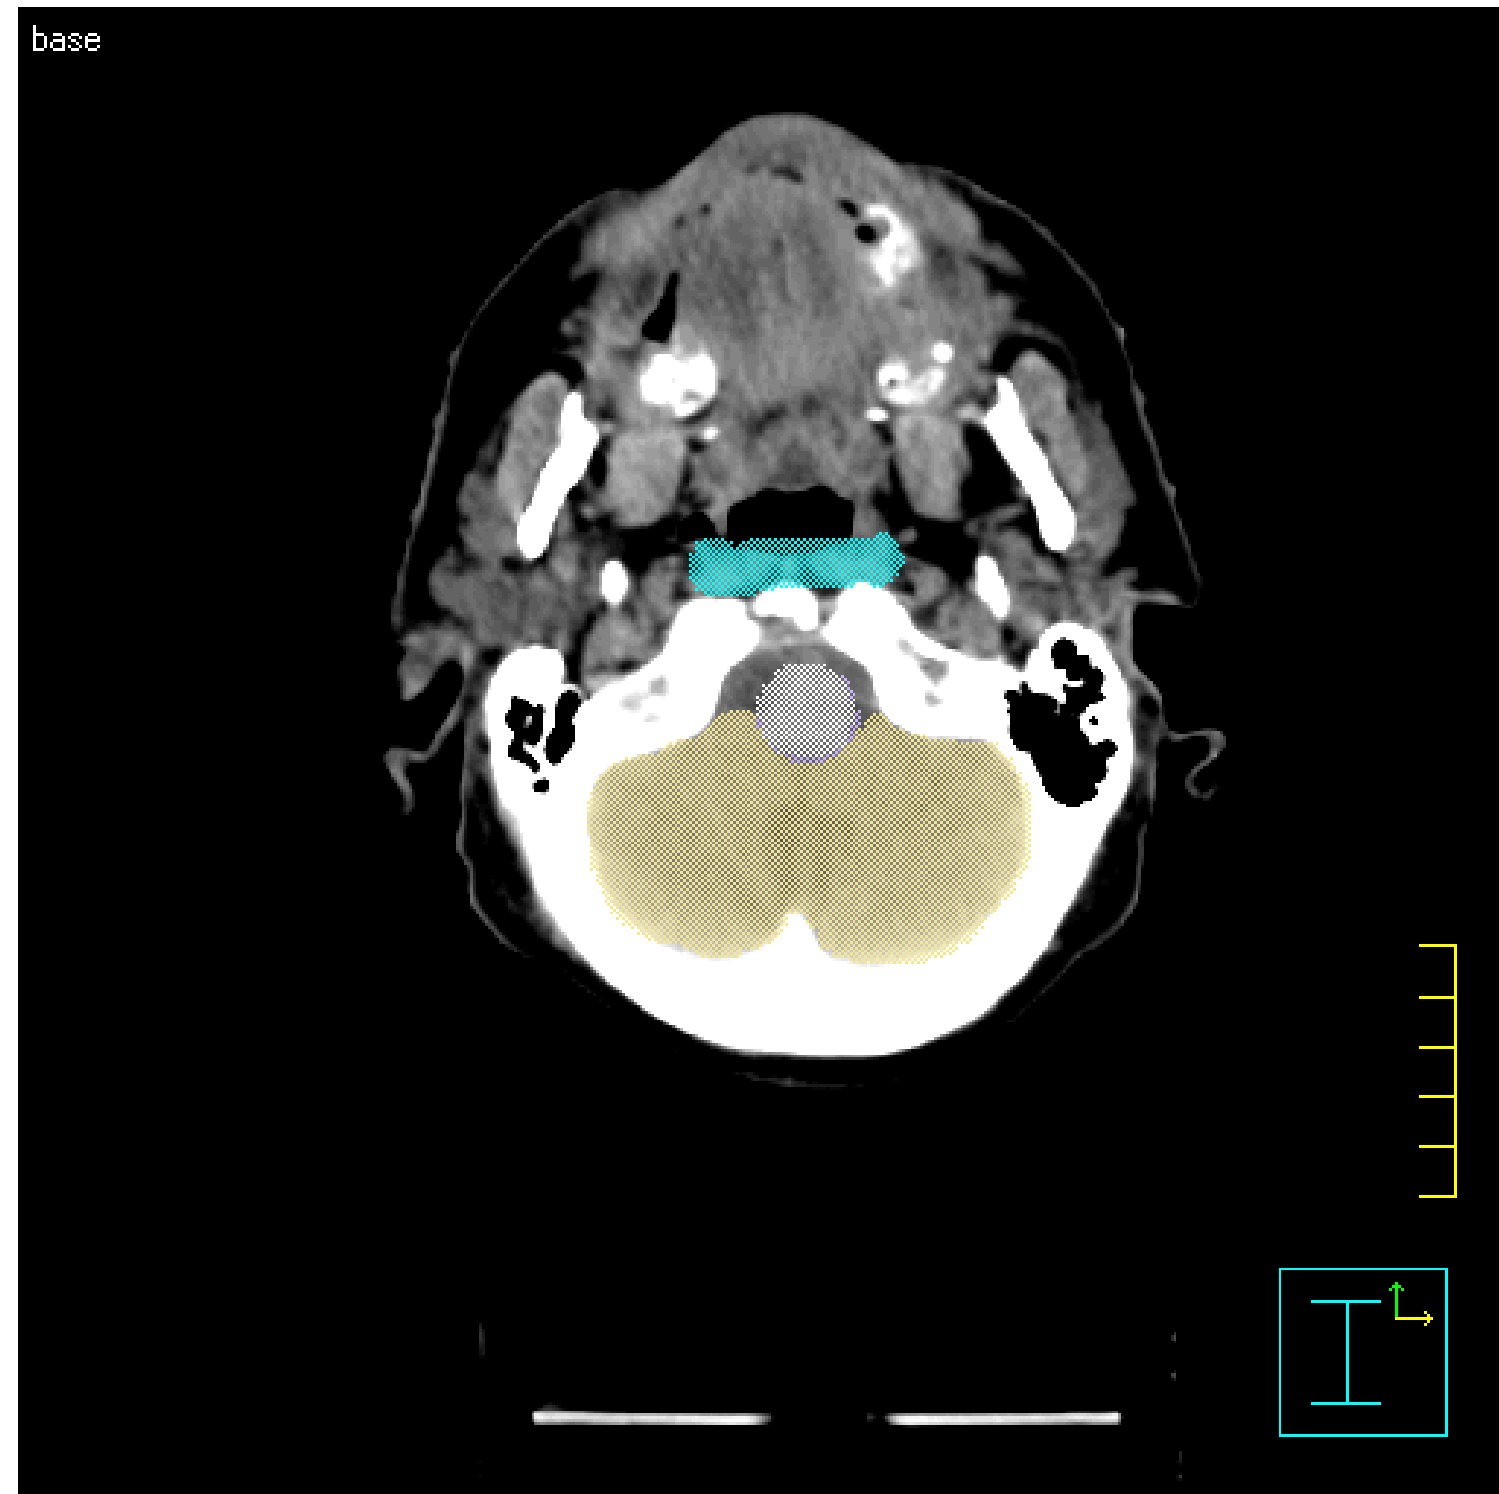

Patient Name: Protocol ID: , Patient ID:

Date / Time: Thu Oct 10 09:44:56 2013

Revision:

MRN:

Comment:

Planner:

Plan Name:

Physician / Physicist:

Institution:

Trial Name:

Pinnacle ID:

Links: [planDB](#)

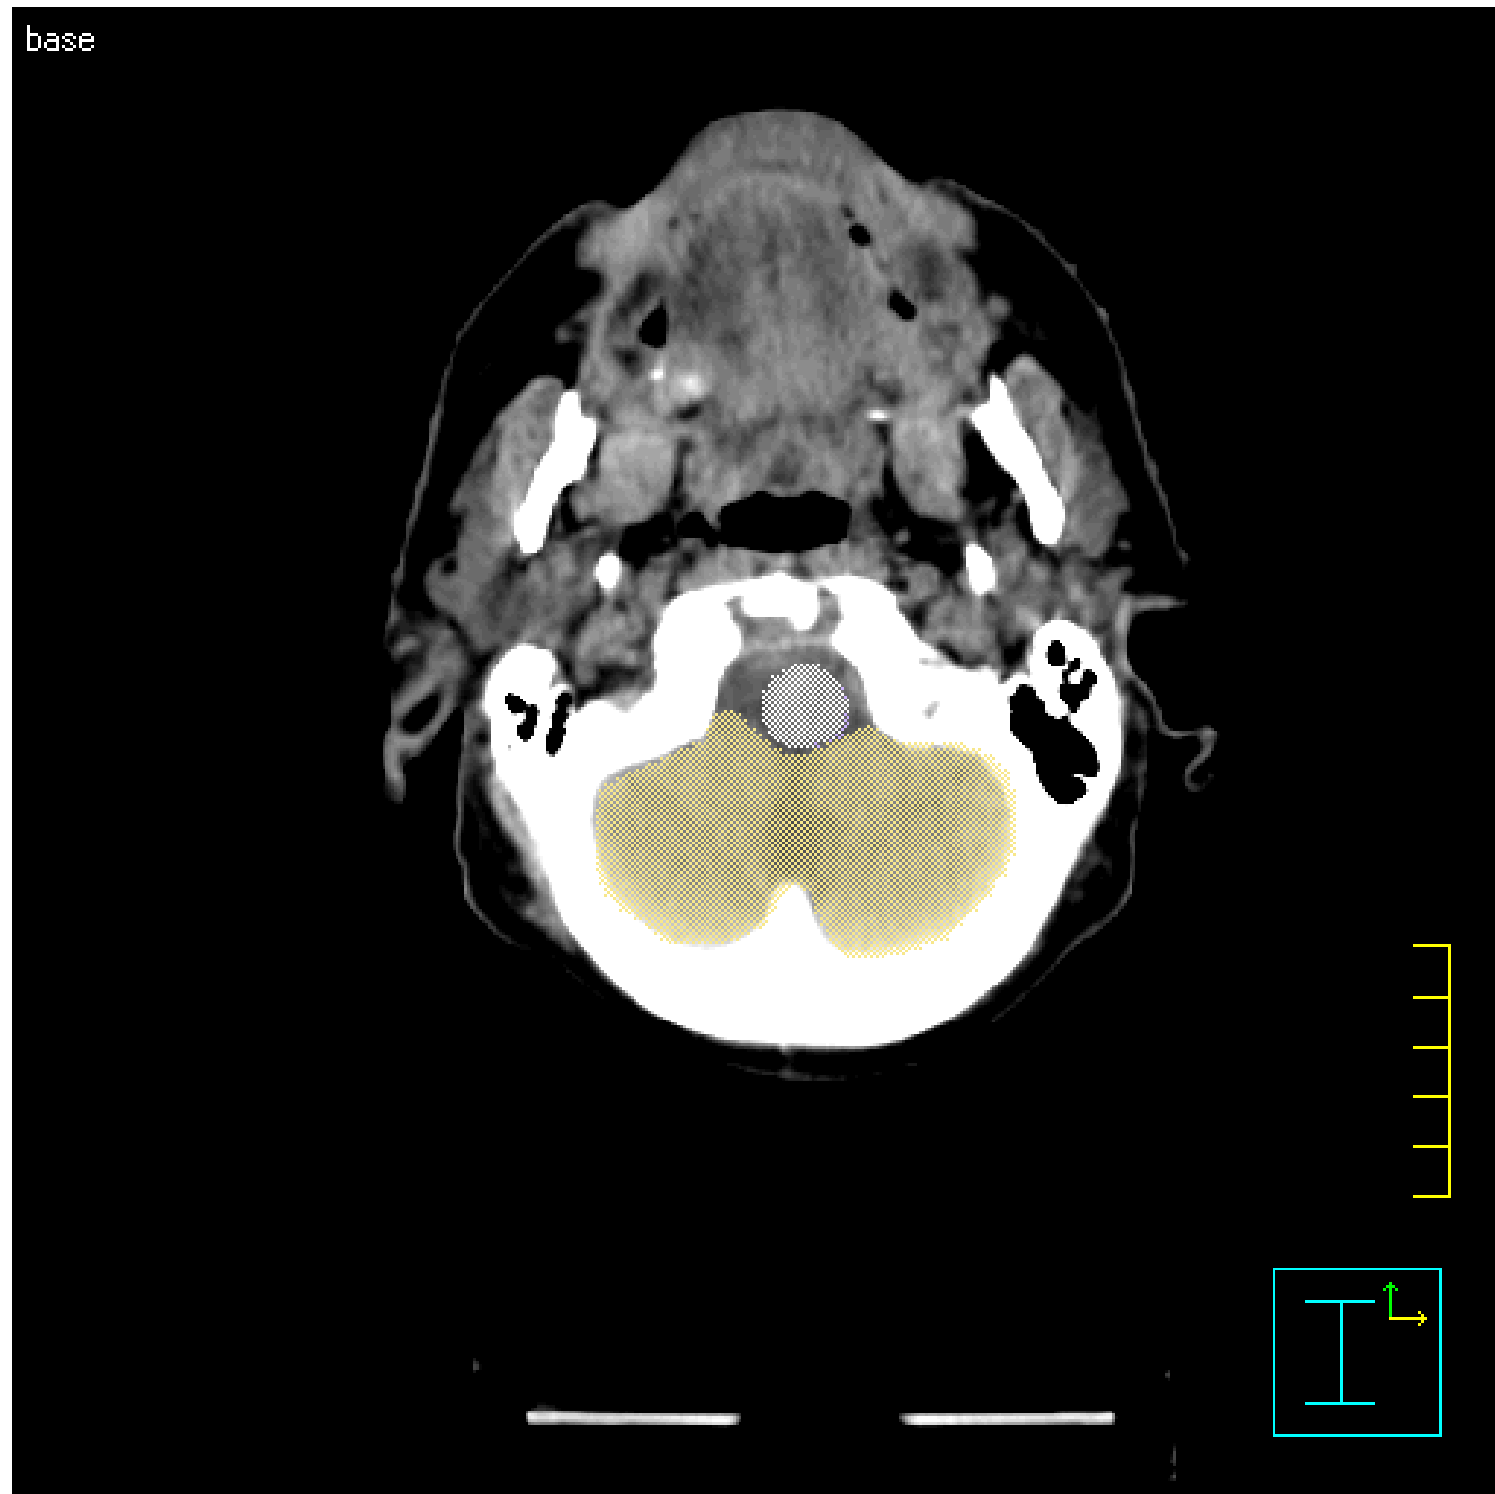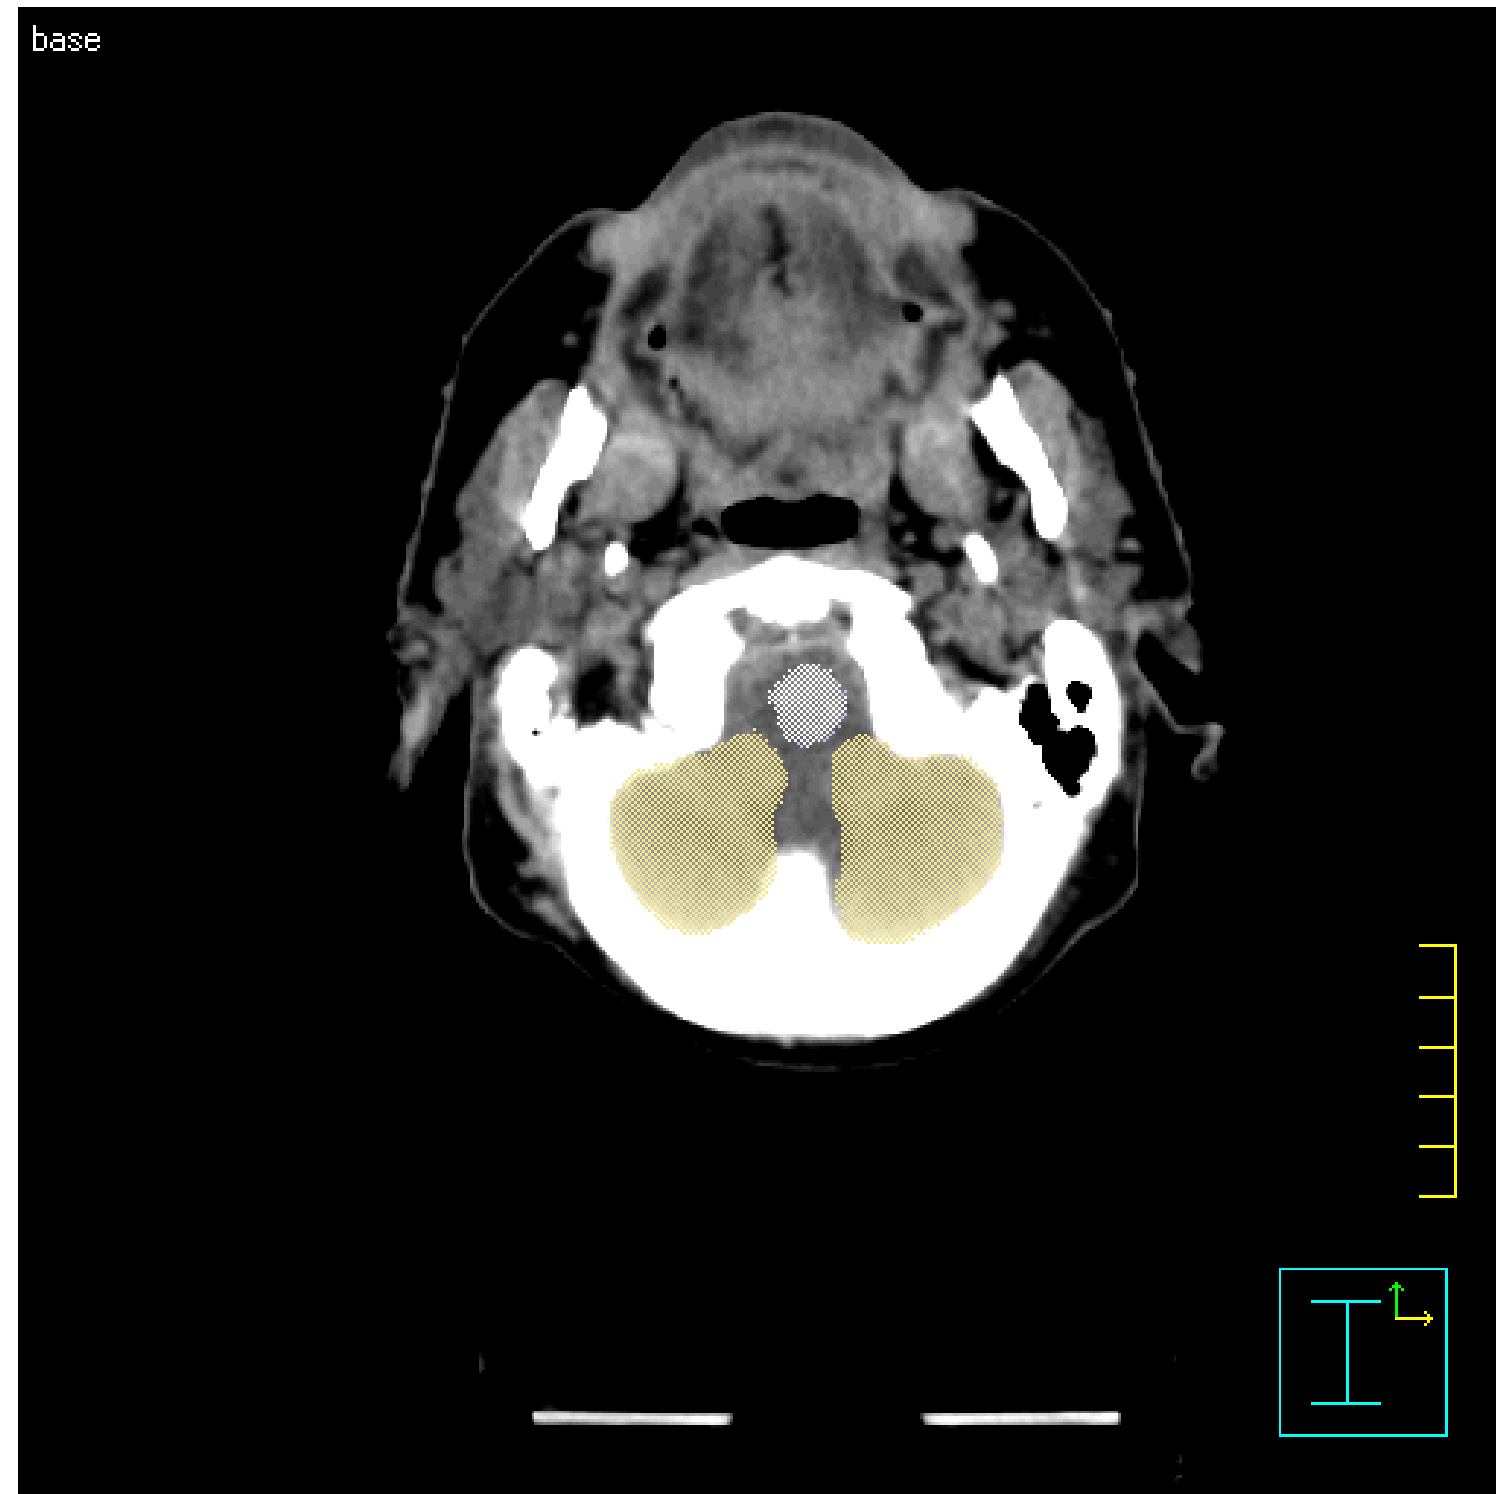



Patient Name: **Protocol ID: , Patient ID:**

Date / Time: Thu Oct 10 09:44:56 2013

Revision:

MRN:

Comment:

Planner:

Plan Name:

Physician / Physicist:

Institution:

Trial Name:

Pinnacle ID:

Links: [planDB](#)

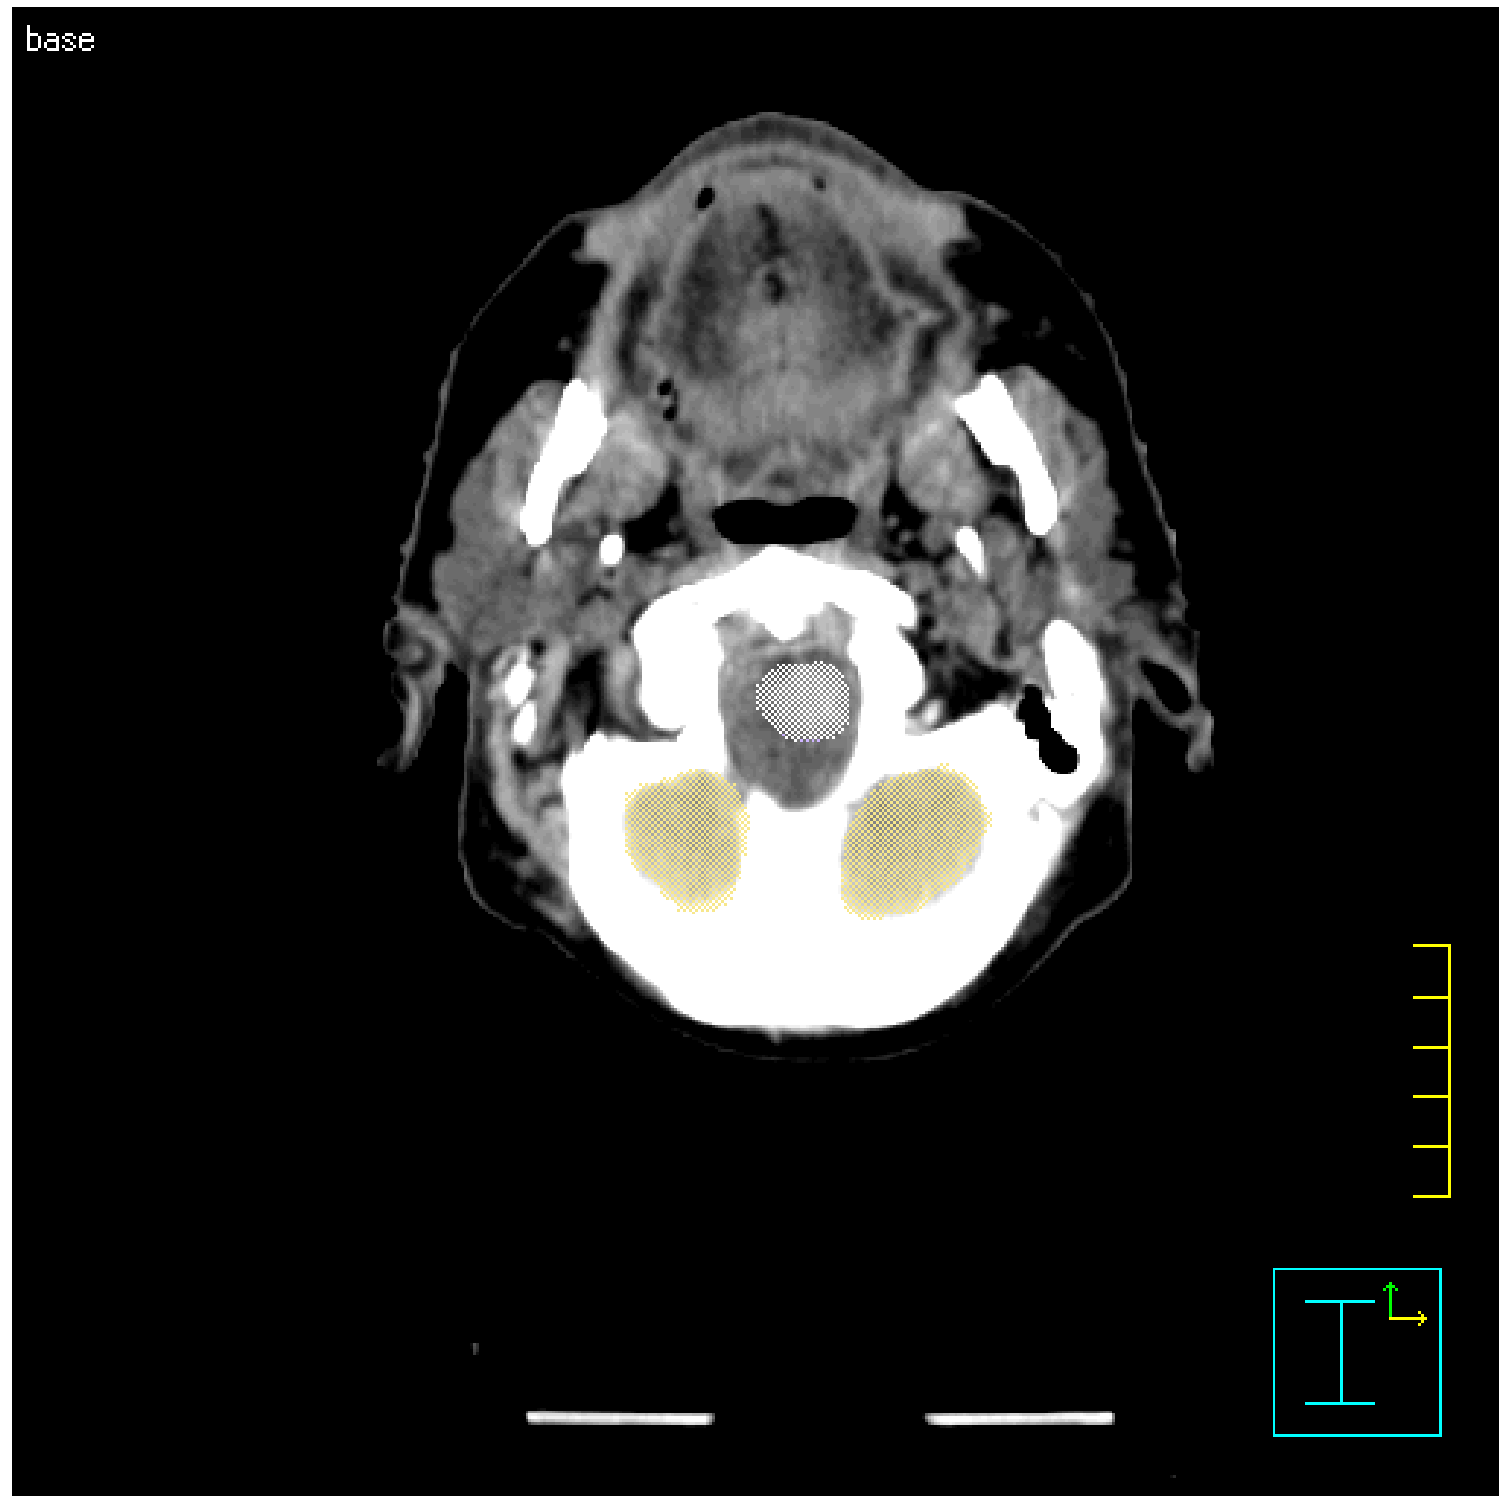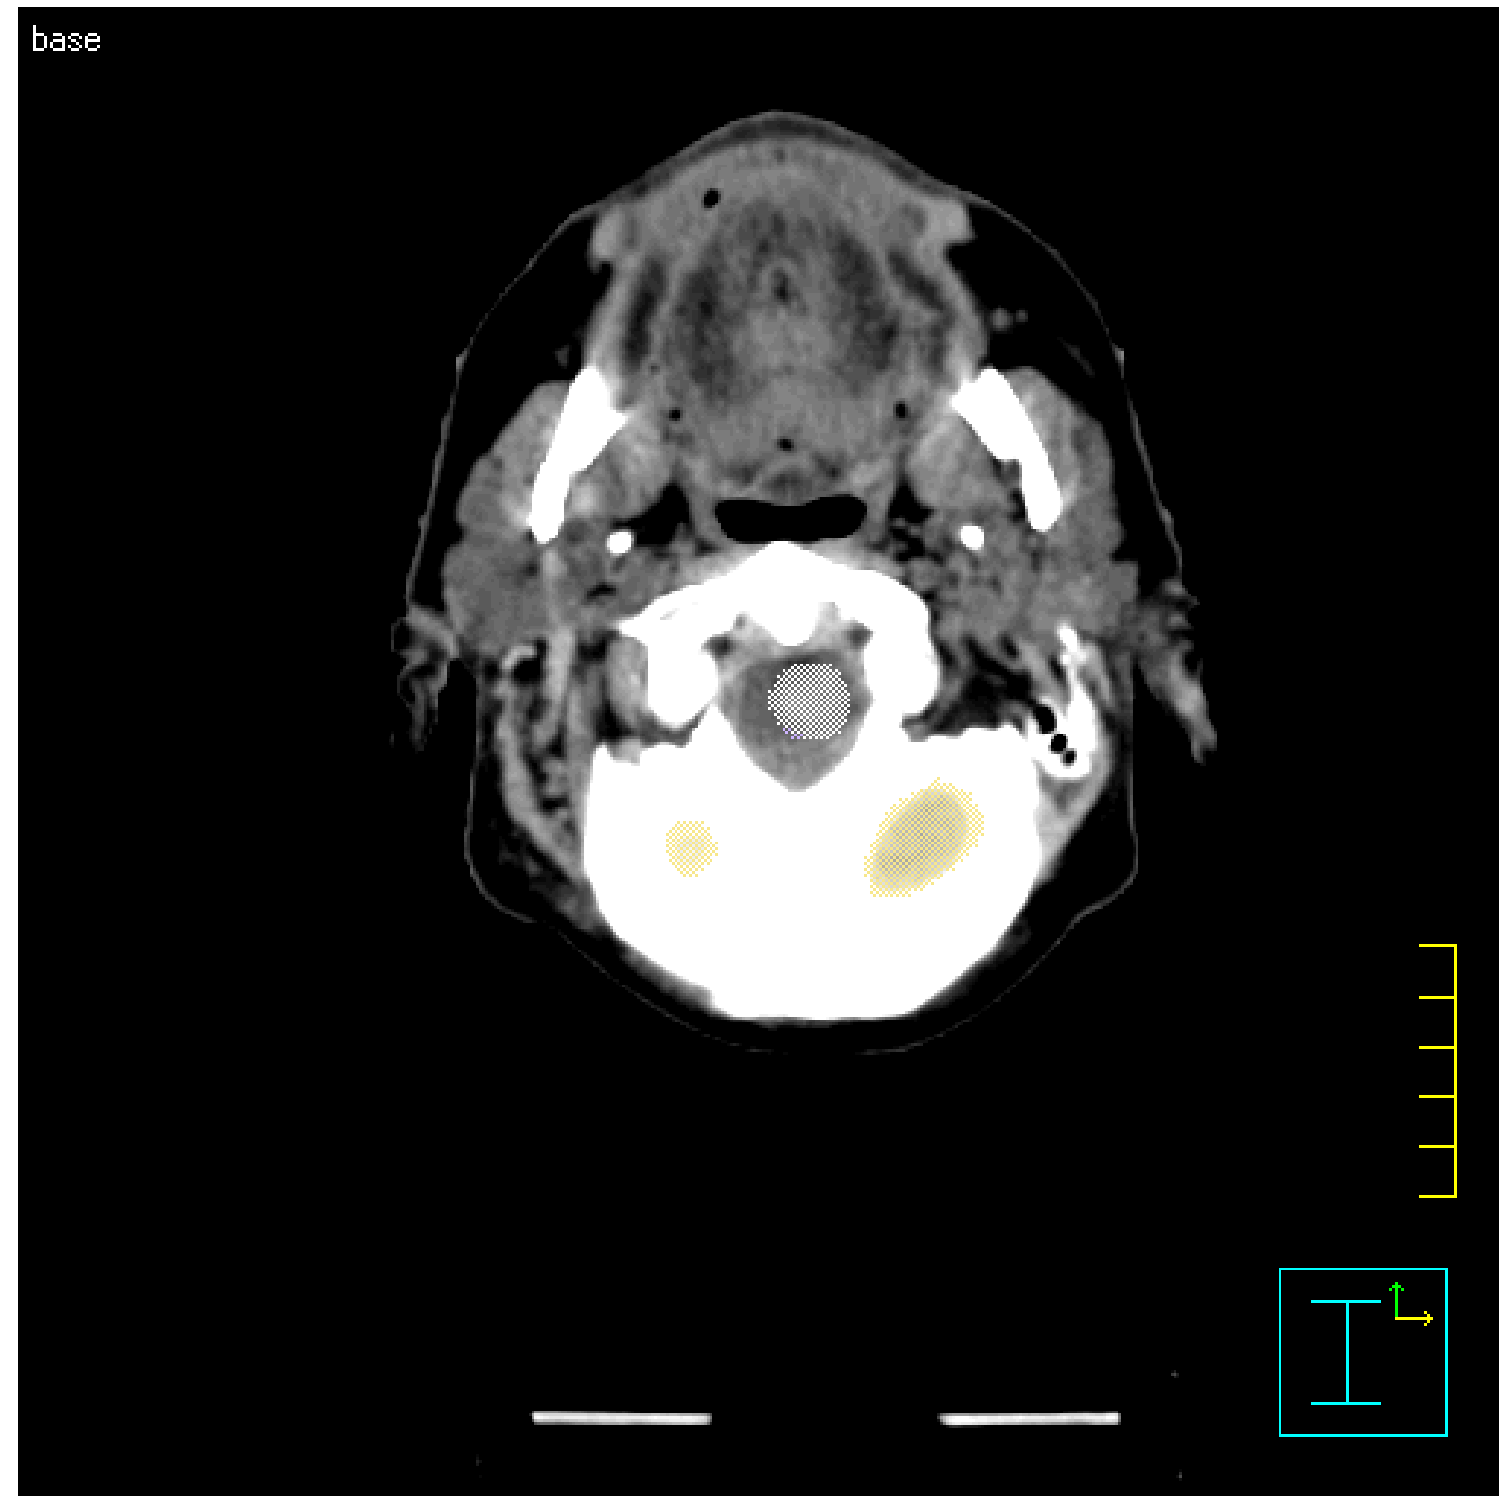

Supplement: NIHMS580936-supplement-02.pdf [file NIHMS580936-supplement-02.pdf]
